# Supplementary material for: Dehydrative allylation of P–H species under metal-free conditions
Source: Royal Society of Chemistry journal article supplement (doi:10.1039/d1gc00191d), 2021-01-01

## Supplementary Information

### Dehydrative allylation of P-H species under metal-free conditions

Xiaobo Yang,<sup>a</sup> Bowen Li,<sup>a</sup> Huicong Xing,<sup>a</sup> Ju Qiu,<sup>a</sup> Teck-Peng Loh,<sup>ab</sup> and Peizhong Xie<sup>a\*</sup>

<sup>a</sup> School of Chemistry and Molecular Engineering, Nanjing Tech University, Nanjing 211816, P. R. China.

<sup>b</sup> Division of Chemistry and Biological Chemistry, School of Physical and Mathematical Sciences, Nanyang Technological University, Singapore 637371.

E-mail: [peizhongxie@njtech.edu.cn](mailto:peizhongxie@njtech.edu.cn)

## Contents

|                                                                                                      |     |
|------------------------------------------------------------------------------------------------------|-----|
| 1. General information.....                                                                          | S1  |
| 2. General procedure.....                                                                            | S1  |
| 2.1 General procedure for preparation of 3a-3ak.....                                                 | S1  |
| 2.2 Procedure for gram scale reactions.....                                                          | S1  |
| 2.3 Preliminary protocol applications.....                                                           | S2  |
| 3. Control experiments.....                                                                          | S3  |
| 3.1 The interaction between P-H species and B(C <sub>6</sub> F <sub>5</sub> ) <sub>3</sub> .....     | S3  |
| 3.2 The interaction between allylic alcohol and B(C <sub>6</sub> H <sub>5</sub> ) <sub>3</sub> ..... | S4  |
| 4. Analytical data for all new compounds.....                                                        | S4  |
| 5. References.....                                                                                   | S20 |
| 6. NMR spectra for new compounds.....                                                                | S21 |

# 1. General information

Unless otherwise noted, all commercially available compounds were used as received. All solvents were purified according to standard procedures. The  $^1\text{H}$  NMR was recorded at 400MHz,  $^{13}\text{C}$  NMR was recorded at 101 MHz,  $^{31}\text{P}$  NMR was recorded at 162 MHz.  $^1\text{H}$ ,  $^{13}\text{C}$  NMR chemical shifts were calibrated to *tetra*-methylsilane as an external reference. Data are reported in the following order: chemical shift ( $\delta$ ) in ppm; multiplicities are indicated s (singlet), d (doublet), t (triplet), dd (doublet of doublets), m (multiplet); coupling constants ( $J$ ) are in Hertz (Hz). IR spectra were recorded on a Thermo Scientific Nicolet iS-5 FT-IR spectrometer and are reported in terms of frequency of absorption ( $\text{cm}^{-1}$ ). HRMS were obtained on an IonSpec FT-ICR mass spectrometer with ESI resource. Melting points were measured on a RY-I apparatus and are reported uncorrected. The starting materials allylic alcohols **1** and P-H species **2** were readily prepared according to the related literatures.<sup>1,2</sup> The catalyst  $\text{B}(\text{C}_6\text{F}_5)_3$  was purchased from *Energy Chemical Ltd* (Shanghai).

## 2. General procedure

### 2.1 General procedure for preparation of 3a-3ak

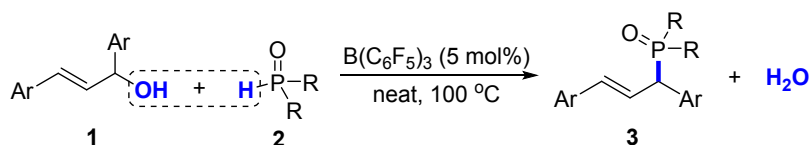

Allylic alcohols **1** (0.2 mmol) and P-H species **2** (0.3 mmol) was added to dried Schlenk tube (10 mL),  $\text{B}(\text{C}_6\text{F}_5)_3$  (5 mol%) was then added subsequently. The reaction was stirred under Ar atmosphere at  $60\text{ }^\circ\text{C}$ - $120\text{ }^\circ\text{C}$  (oil bath) for 2-24 h. After complete conversion, products was purified *via* PTLC (Petroleum ether (bp:  $60$ - $90\text{ }^\circ\text{C}$ )/ethyl acetate = 1/1) to afford the corresponding products **3a-3ak**.

### 2.2 Procedure for gram scale reactions

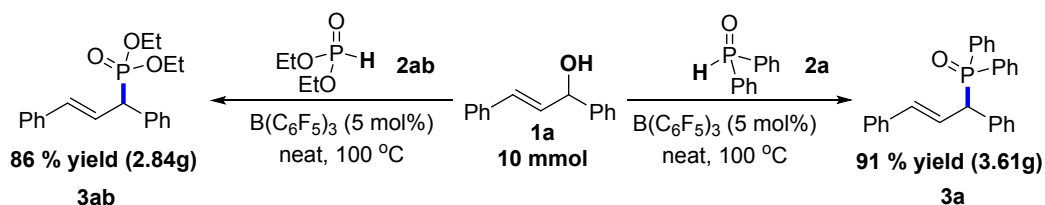

**Procedure for synthesis of 3a in gram scale:** (E)-1,3-diphenylprop-2-en-1-ol **1a** (10.0 mmol), diphenylphosphine oxide **2a** (15.0 mmol) was added to round-bottomed flask (100 mL), and  $\text{B}(\text{C}_6\text{F}_5)_3$  (0.5 mmol) was then added subsequently. The reaction was stirred under Ar atmosphere at  $100\text{ }^\circ\text{C}$  (oil bath) for 12 h. After complete conversion, product was purified via column chromatography

(Petroleum ether (bp: 60-90 °C)/ethyl acetate = 3/1) to afford the corresponding product **3a** (3.61 g, 91 % yield).

**Procedure for synthesis of 3ab in gram scale:** (*E*)-1,3-diphenylprop-2-en-1-ol **1a** (10.0 mmol), diethyl phosphite **2ab** (40.0 mmol) was added into round-bottomed flask (100 mL), and B(C<sub>6</sub>F<sub>5</sub>)<sub>3</sub> (0.5 mmol) was then added subsequently. The reaction was stirred under Ar atmosphere at 100 °C (sand bath) for 12 h. After complete conversion, products was purified *via* column chromatography (Petroleum ether (bp: 60-90 °C)/ethyl acetate = 3/1) to afford the corresponding product **3ab** (2.84 g, 86 % yield).

### 2.3 Preliminary protocol applications.

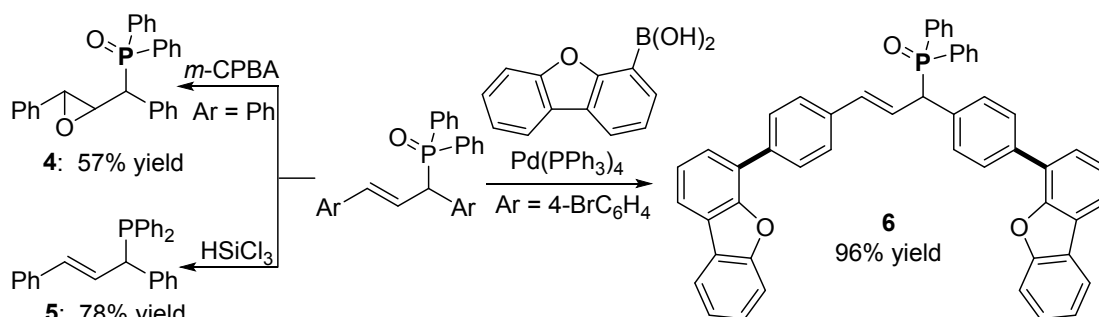

Procedure for synthesis of **4**: Allylic phosphorus compound **3a** (0.2 mmol) and *m*-CPBA (0.4 mmol) was dissolved in CH<sub>2</sub>Cl<sub>2</sub> (2.0 mL) in Schlenk tube (10 mL). The reaction was stirred at room temperature for 36 h. After complete conversion, the residue was purified by PTLC (Petroleum ether (bp: 60-90 °C)/ethyl acetate = 1/1) to afford the corresponding product **4** in 57 % yield.

**Procedure for synthesis of 5** (known compound <sup>6</sup>): Allylic phosphorus compound **3a** (0.2 mmol), HSiCl<sub>3</sub> (4.0 mmol), and NEt<sub>3</sub> (2.0 mmol) was dissolved in toluene (2.0 mL) in Schlenk tube (10 mL). The reaction was stirred at 120 °C (sand bath) for 3 h. After filtration, the product was washed with MeOH (10 mL) and dried under vacuum to afford the corresponding product **5** (78 % yield).

Procedure for synthesis of **6**: Allylic phosphorus compound **3a** (0.2 mmol), dibenzo[*b,d*]furan-4-yl boronic acid (4.0 equiv.), Pd(PPh<sub>3</sub>)<sub>4</sub> (10 mol%), and CsF (5.0 equiv) was dissolved in xylene (2.0 mL) in Schlenk tube (10 mL) under N<sub>2</sub> atmosphere. The reaction was stirred at 60 °C (oil bath) for 12 h. After complete conversion, the solvent was removed under vacuum. Then, the residue was purified by PTLC (Petroleum ether (bp: 60-90 °C)/ethyl acetate = 1/1) to afford the corresponding product **6** (96 % yield).

### 3. Control experiments.

#### 3.1 The interaction between P-H species and B(C<sub>6</sub>F<sub>5</sub>)<sub>3</sub>

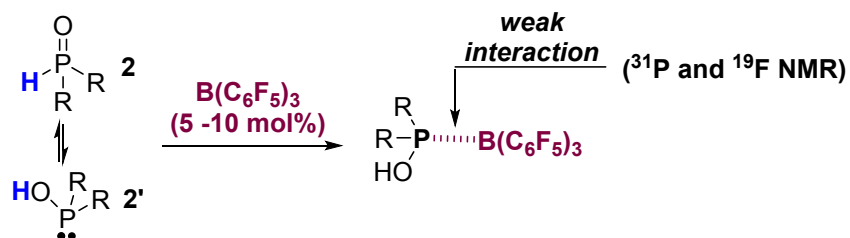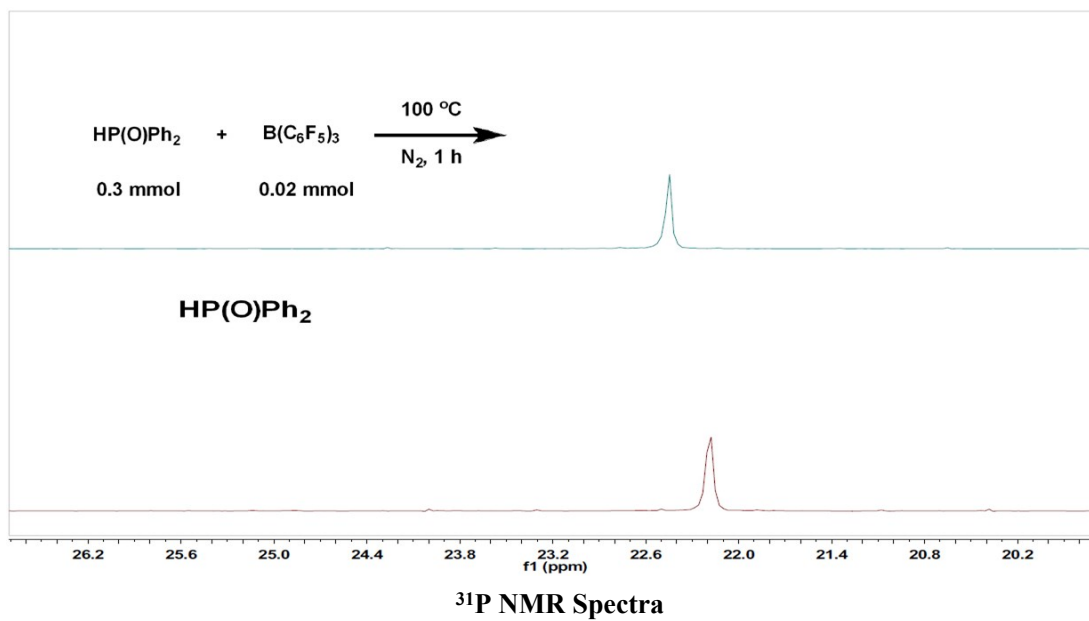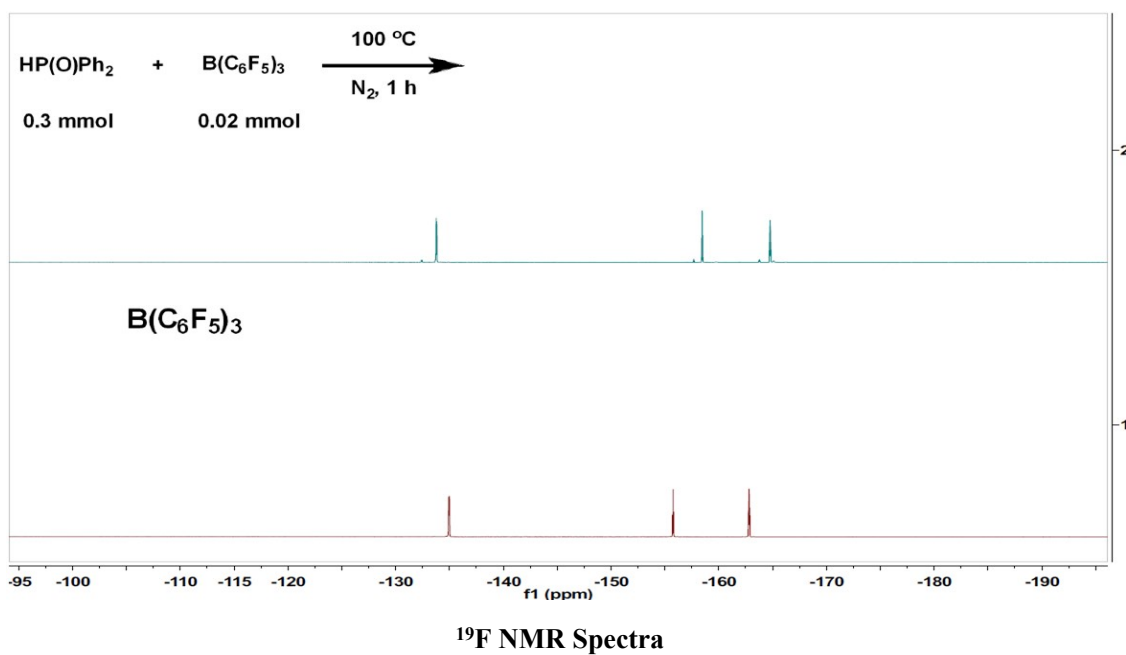



### 3.2 The interaction between allylic alcohol and B(C<sub>6</sub>H<sub>5</sub>)<sub>3</sub>

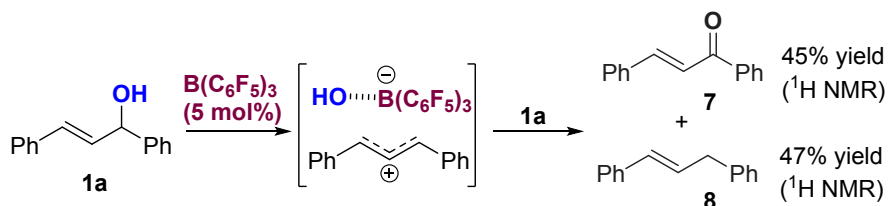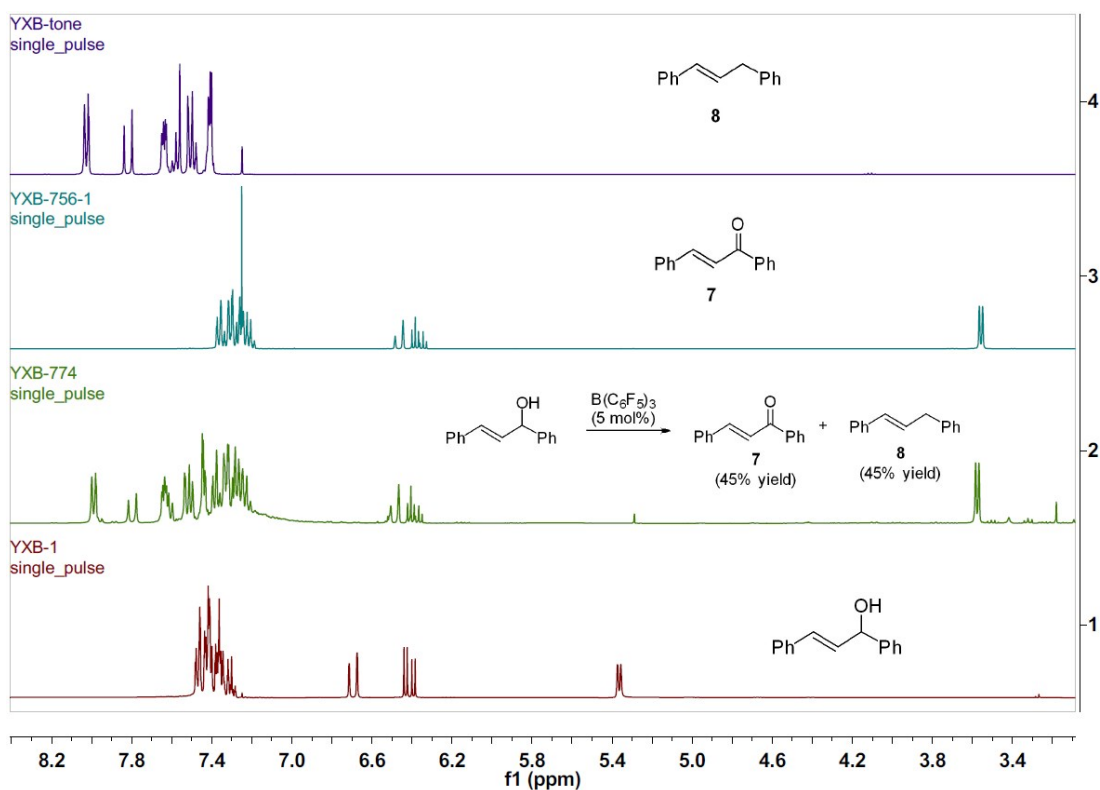

<sup>1</sup>H NMR Spectra

### 3.3 The reaction in the presence of dehydrating agents

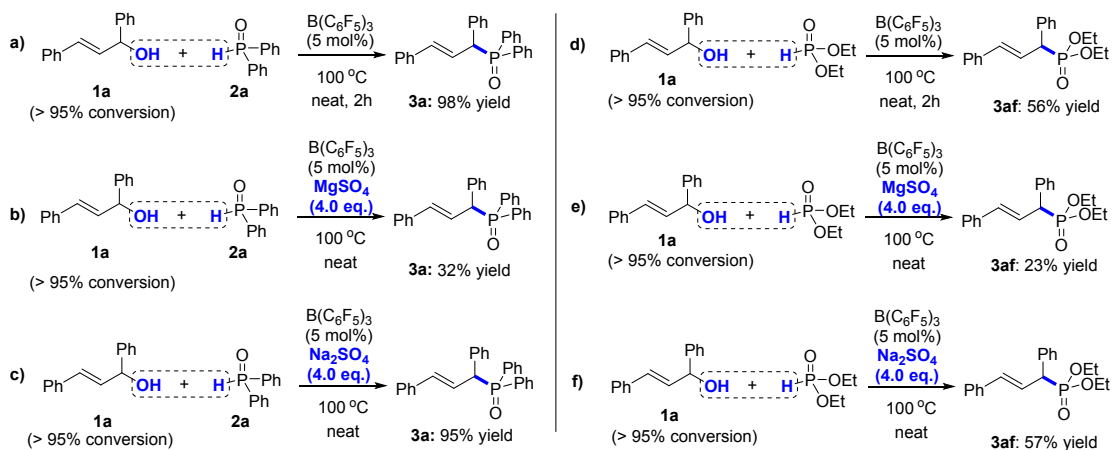

## 4. Analytical data for all new compounds

### (E)-(1,3-diphenylallyl)diphenylphosphine oxide (3a)

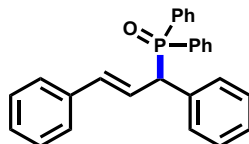

**3a** was known compounds<sup>3,4,5</sup>. Following the general procedure, the reaction was stirred at 100 °C (oil bath) for 2h. **3a** was isolated by PTLC (Petroleum ether (bp: 60-90 °C)/ethyl acetate = 1/1) as white solid (77 mg, 98% yield), Mp: 203-205 °C. <sup>1</sup>H NMR (400 MHz, Chloroform-*d*) δ 7.88 – 7.80 (m, 2H), 7.61 – 7.55 (m, 2H), 7.48 – 7.39 (m, 3H), 7.38 – 7.32 (m, 3H), 7.31 – 7.26 (m, 2H), 7.23 – 7.13 (m, 8H), 6.59 (ddd, *J* = 15.8, 9.1, 7.1 Hz, 1H), 6.32 (dd, *J* = 15.8, 3.8 Hz, 1H), 4.38 (t, *J* = 9.4 Hz, 1H). <sup>13</sup>C NMR (101 MHz, Chloroform-*d*) δ 136.8, 136.8, 136.0 (d, *J*<sub>C-P</sub> = 6.0 Hz), 134.6, 134.4, 132.2 (d, *J*<sub>C-P</sub> = 31.3 Hz), 131.9 (d, *J*<sub>C-P</sub> = 2.9 Hz), 131.8, 131.8, 131.6 (d, *J*<sub>C-P</sub> = 2.7 Hz), 131.5, 131.4, 131.2 (d, *J*<sub>C-P</sub> = 31.6 Hz), 129.6, 129.5, 128.7, 128.7, 128.6, 128.5, 128.5, 128.4, 128.2, 127.7, 127.2 (d, *J*<sub>C-P</sub> = 2.4 Hz), 126.5 (d, *J*<sub>C-P</sub> = 1.8 Hz), 124.7 (d, *J*<sub>C-P</sub> = 7.2 Hz), 52.4 (d, *J*<sub>C-P</sub> = 65.0 Hz). <sup>31</sup>P NMR (162 MHz, Chloroform-*d*) δ = 32.06. IR (KBr): 3057.30, 2909.00, 1597.06, 1492.77, 1437.23, 1170.76, 1118.33, 1101.29, 1029.07, 972.24, 719.89, 691.76 cm<sup>-1</sup>. HRMS (ESI/[M+H]<sup>+</sup>) Calcd. for: C<sub>27</sub>H<sub>24</sub>OP 395.1565, found 395.1559.

### (E)-(1,3-di-*o*-tolylallyl)diphenylphosphine oxide (3b)

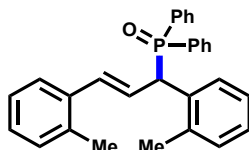

**3b** was known compounds<sup>3,5</sup>. Following the general procedure, the reaction was stirred at 100 °C (oil bath) for 2h. **3b** was isolated by PTLC (Petroleum ether (bp: 60-90 °C)/ethyl acetate = 1/1) as white solid (84 mg, 99% yield), Mp: 203-205 °C. <sup>1</sup>H NMR (400 MHz, Chloroform-*d*) δ 7.95 – 7.85 (m, 3H), 7.57 – 7.44 (m, 5H), 7.42 – 7.34 (m, 1H), 7.27 (s, 3H), 7.20 (t, *J* = 7.3 Hz, 1H), 7.15 – 6.99 (m, 5H), 6.54 – 6.43 (m, 1H), 6.34 (dt, *J* = 15.3, 7.9 Hz, 1H), 4.64 (t, *J* = 9.4 Hz, 1H), 2.14 (s, 3H), 2.00 (s, 3H). <sup>13</sup>C NMR (101 MHz, Chloroform-*d*) δ 135.0 (d, *J*<sub>C-P</sub> = 1.9 Hz), 135.9 (d, *J*<sub>C-P</sub> = 7.6 Hz), 135.2, 134.5 (d, *J*<sub>C-P</sub> = 5.4 Hz), 132.9, 132.6, 132.4, 132.0, 132.0, 131.9 (d, *J*<sub>C-P</sub> = 3.4 Hz), 131.6 (d, *J*<sub>C-P</sub> = 2.7 Hz), 131.2, 131.2, 131.0, 130.5, 130.0, 129.5 (d, *J*<sub>C-P</sub> = 4.5 Hz), 128.6, 128.5, 128.3, 128.2, 127.6, 127.2, 126.6, 126.1, 126.0, 47.9 (d, *J*<sub>C-P</sub> = 66.3 Hz), 19.8, 19.6. <sup>31</sup>P NMR (162 MHz, Chloroform-*d*) δ 32.58. IR (KBr): 3055.20, 2924.95, 1484.92, 1460.07, 1437.11, 1185.50, 1117.12, 1070.62, 1070.62, 964.09, 720.25, 695.62 cm<sup>-1</sup>. HRMS (ESI/[M+H]<sup>+</sup>) Calcd. for: C<sub>29</sub>H<sub>28</sub>OP 423.1878, found 423.1879.

### (E)-(1,3-di-*m*-tolylallyl)diphenylphosphine oxide(3c)

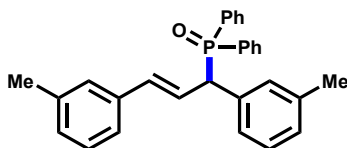

**3c** was known compounds<sup>3,4,5</sup>. Following the general procedure, the reaction was stirred at 100 °C (oil bath) for 2h. **3c** was isolated by PTLC (Petroleum ether (bp: 60-90 °C)/ethyl acetate = 1/1) as white solid (71 mg, 84% yield), Mp: 168-169 °C. <sup>1</sup>H NMR (400 MHz, Chloroform-*d*) δ 7.88 – 7.80 (m, 2H),

7.61 – 7.54 (m, 2H), 7.52 – 7.42 (m, 3H), 7.38 (td,  $J = 7.3, 1.4$  Hz, 1H), 7.32 – 7.27 (m, 2H), 7.17 – 7.04 (m, 5H), 6.99 (t,  $J = 7.6$  Hz, 3H), 6.58 (ddd,  $J = 16.0, 9.2, 7.3$  Hz, 1H), 6.29 (dd,  $J = 15.7, 3.7$  Hz, 1H), 4.33 (t,  $J = 9.4$  Hz, 1H), 2.27 (s, 3H), 2.24 (s, 3H).  $^{13}\text{C}$  NMR (101 MHz, Chloroform-*d*)  $\delta$  138.2, 138.1, 136.7, 135.9 (d,  $J_{\text{C-P}} = 6.0$  Hz), 134.5 (d,  $J_{\text{C-P}} = 11.4$  Hz), 132.3 (d,  $J_{\text{C-P}} = 35.6$  Hz), 131.9, 131.8, 131.6, 131.5, 131.4, 131.1, 130.3 (d,  $J_{\text{C-P}} = 5.7$  Hz), 128.6, 128.5, 128.4, 128.3, 128.2, 128.0, 127.1, 126.5 (d,  $J_{\text{C-P}} = 5.8$  Hz), 124.5 (d,  $J_{\text{C-P}} = 7.4$  Hz), 123.8, 52.4 (d,  $J_{\text{C-P}} = 65.2$  Hz), 21.5, 21.5.  $^{31}\text{P}$  NMR (162 MHz, Chloroform-*d*)  $\delta$  31.99. IR (KBr): 3051.61, 2920.57, 2854.29, 1603.31, 1586.27, 1486.48, 1437.44, 1175.49, 1116.43, 1071.01, 963.48, 781.25, 718.76, 703.55  $\text{cm}^{-1}$ . HRMS (ESI/[M+H] $^{+}$ ) Calcd. for:  $\text{C}_{29}\text{H}_{28}\text{OP}$  423.1878, found 423.1880.

**(E)-(1,3-di-*p*-tolylallyl)diphenylphosphine oxide (3d)**

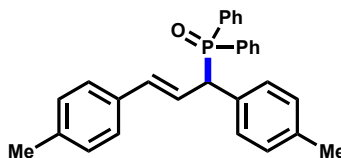

**3d** was known compounds<sup>3, 4, 5</sup>. Following the general procedure, the reaction was stirred at 100 °C (oil bath) for 2h. **3d** was isolated by PTLC (Petroleum ether (bp: 60-90 °C)/ethyl acetate = 1/1) as white solid (84 mg, 99% yield), Mp: 182-183 °C.  $^1\text{H}$  NMR (400 MHz, Chloroform-*d*)  $\delta$  7.88 – 7.75 (m, 2H), 7.64 – 7.56 (m, 2H), 7.52 – 7.37 (m, 4H), 7.35 – 7.28 (m, 2H), 7.22 (dd,  $J = 8.1, 1.9$  Hz, 2H), 7.10 (d,  $J = 8.0$  Hz, 2H), 7.03 (d,  $J = 8.4$  Hz, 4H), 6.49 (ddd,  $J = 16.0, 9.1, 7.0$  Hz, 1H), 6.25 (dd,  $J = 15.7, 3.9$  Hz, 1H), 4.32 (t,  $J = 9.6$  Hz, 1H), 2.28 (s, 3H), 2.26 (s, 3H).  $^{13}\text{C}$  NMR (101 MHz, Chloroform-*d*)  $\delta$  137.5 (d,  $J_{\text{C-P}} = 0.9$  Hz), 136.8 (d,  $J_{\text{C-P}} = 2.4$  Hz), 134.2, 134.1, 134.1, 133.0, 132.9, 132.4 (d,  $J_{\text{C-P}} = 30.4$  Hz), 131.9, 131.8, 131.7 (d,  $J_{\text{C-P}} = 16.9$  Hz), 131.6 (d,  $J_{\text{C-P}} = 2.9$  Hz), 131.5, 131.4, 131.3, 129.4, 129.4, 129.4, 129.2, 128.5, 128.4, 128.3, 128.2, 126.4, 126.4, 123.8 (d,  $J_{\text{C-P}} = 7.1$  Hz), 52.0 (d,  $J_{\text{C-P}} = 65.5$  Hz), 21.3, 21.2.  $^{31}\text{P}$  NMR (162 MHz, Chloroform-*d*)  $\delta = 31.99$ . IR (KBr): 3051.67, 3024.73, 2920.68, 2854.24, 1511.13, 1437.44, 1180.59, 1117.79, 1102.92, 1070.87, 968.82, 824.41, 801.93, 728.68, 718.45, 694.90  $\text{cm}^{-1}$ . HRMS (ESI/[M+H] $^{+}$ ) Calcd. for:  $\text{C}_{29}\text{H}_{28}\text{OP}$  423.1878, found 423.1872.

**(E)-(1,3-bis(4-methoxyphenyl)allyl)diphenylphosphine oxide(3e)**

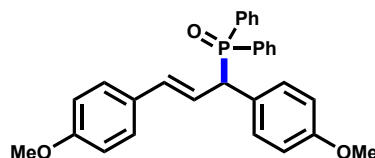

**3e** was known compounds<sup>3</sup>. Following the general procedure, the reaction was stirred at 100 °C (oil bath) for 2h. **3e** was isolated by PTLC (Petroleum ether (bp: 60-90 °C)/ethyl acetate = 1/1) as white solid (82 mg, 90% yield), Mp: 137-139 °C.  $^1\text{H}$  NMR (400 MHz, Chloroform-*d*)  $\delta$  7.88 – 7.80 (m, 2H), 7.63 – 7.56 (m, 2H), 7.48 – 7.39 (m, 3H), 7.38 – 7.32 (m, 1H), 7.31 – 7.26 (m, 4H), 7.16 – 7.10 (m, 2H), 6.76 (d,  $J = 2.9$  Hz, 2H), 6.73 (d,  $J = 3.0$  Hz, 2H), 6.41 (ddd,  $J = 15.8, 8.9, 7.0$  Hz, 1H), 6.25 (dd,  $J = 15.8, 3.7$  Hz, 1H), 4.34 (t,  $J = 9.4$  Hz, 1H), 3.70 (s, 3H), 3.68 (s, 3H).  $^{13}\text{C}$  NMR (101 MHz, Chloroform-*d*)  $\delta$  159.3, 158.7 (d,  $J_{\text{C-P}} = 2.3$  Hz), 133.8, 133.7, 132.5 (d,  $J_{\text{C-P}} = 29.6$  Hz), 131.8, 131.8 (d,  $J_{\text{C-P}} = 2.9$  Hz), 131.7, 131.7, 131.6 (d,  $J_{\text{C-P}} = 2.7$  Hz), 131.5, 131.4, 130.6, 130.6, 129.7 (d,  $J_{\text{C-P}} = 2.4$  Hz), 128.6, 128.4, 128.4, 128.2, 128.1 (d,  $J_{\text{C-P}} = 5.9$  Hz), 127.6, 127.6, 122.6 (d,  $J_{\text{C-P}} = 7.0$  Hz), 114.1, 114.1, 113.9, 55.3, 55.3, 51.3 (d,  $J_{\text{C-P}} = 66.0$  Hz).  $^{31}\text{P}$  NMR (162 MHz, Chloroform-*d*)  $\delta = 32.24$ . IR (KBr): 3055.39, 3031.19, 3005.95, 2956.04, 2933.66, 2907.62, 2835.50, 1608.06, 1577.13, 1510.50, 1484.94, 1462.70, 1437.74, 1293.30, 1251.21, 1174.48, 1118.77, 968.80, 864.91, 828.96, 811.65,

734.36, 719.08, 710.32, 694.26. HRMS (ESI/[M+H]<sup>+</sup>) Calcd. for: C<sub>29</sub>H<sub>28</sub>O<sub>3</sub>P 455.1776, found 455.1771.

**(E)-(1,3-bis(4-(tert-butyl)phenyl)allyl)diphenylphosphine oxide (3f)**

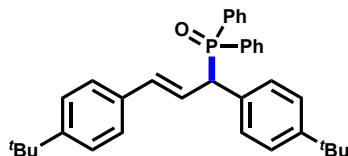

**3f** was known compounds<sup>3, 5</sup>. Following the general procedure, the reaction was stirred at 100 °C (oil bath) for 2h. **3f** was isolated by PTLC (Petroleum ether (bp: 60-90 °C)/ethyl acetate = 1/1) as white solid (41 mg, 40% yield), Mp: 257-258 °C. <sup>1</sup>H NMR (400 MHz, Chloroform-*d*) δ 7.88 – 7.81 (m, 2H), 7.58 – 7.51 (m, 2H), 7.51 – 7.42 (m, 3H), 7.39 (td, *J* = 7.3, 1.1 Hz, 1H), 7.29 (td, *J* = 6.7, 5.8, 1.9 Hz, 2H), 7.29 – 7.21 (m, 2H), 7.21 (s, 4H), 7.16 (d, *J* = 8.4 Hz, 2H), 6.55 (ddd, *J* = 16.1, 9.3, 7.3 Hz, 1H), 6.33 (dd, *J* = 15.7, 3.7 Hz, 1H), 4.35 (t, *J* = 9.6 Hz, 1H), 1.27(s, 9H), 1.25 (s, 9H). <sup>13</sup>C NMR (101 MHz, Chloroform-*d*) δ 150.7 (d, *J*<sub>C-P</sub> = 0.9 Hz), 150.0 (d, *J*<sub>C-P</sub> = 2.5 Hz), 134.1 (d, *J*<sub>C-P</sub> = 2.3 Hz), 134.1 (d, *J*<sub>C-P</sub> = 11.3 Hz), 132.9, 132.8, 132.7, 132.0, 131.9, 131.9, 131.8 (d, *J*<sub>C-P</sub> = 2.7 Hz), 131.7, 131.5, 131.5, 131.4, 131.1, 129.1 (d, *J*<sub>C-P</sub> = 5.7 Hz), 128.5, 128.4, 128.2, 128.1, 126.2, 126.2, 125.5 (d, *J*<sub>C-P</sub> = 1.5 Hz), 125.4, 124.0 (d, *J*<sub>C-P</sub> = 6.9 Hz), 51.9 (d, *J*<sub>C-P</sub> = 65.1 Hz), 34.6, 34.5, 31.4, 31.3. <sup>31</sup>P NMR (162 MHz, Chloroform-*d*) δ = 32.16. IR (KBr): 3055.47, 2963.47, 1509.51, 1436.69, 1364.81, 1181.77, 1171.09, 1117.57, 781.57, 693.11 cm<sup>-1</sup>. HRMS (ESI/[M+H]<sup>+</sup>) Calcd. for: C<sub>35</sub>H<sub>40</sub>OP 507.2817, found 507.2823.

**(E)-(1,3-bis(3,5-dimethylphenyl)allyl)diphenylphosphine oxide (3g)**

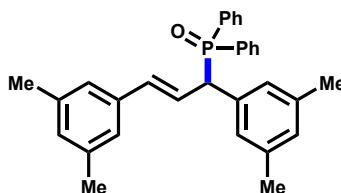

**3g** was known compounds<sup>3</sup>. Following the general procedure, the reaction was stirred at 100 °C (oil bath) for 2h. **3g** was isolated by PTLC (Petroleum ether (bp: 60-90 °C)/ethyl acetate = 1/1) as white solid (46 mg, 51% yield), Mp: 194-195 °C. <sup>1</sup>H NMR (400 MHz, Chloroform-*d*) δ 7.85 – 7.80 (m, 2H), 7.59 – 7.54 (m, 2H), 7.51 – 7.43 (m, 3H), 7.41 – 7.36 (m, 1H), 7.33 – 7.28 (m, 2H), 6.88 (d, *J* = 19.6 Hz, 4H), 6.80 (d, *J* = 8.6 Hz, 2H), 6.55 (ddd, *J* = 15.8, 9.4, 7.2 Hz, 1H), 6.24 (dd, *J* = 15.8, 3.8 Hz, 1H), 4.27 (t, *J* = 9.6 Hz, 1H), 2.24 (s, 6H), 2.19 (s, 6H). <sup>13</sup>C NMR (101 MHz, Chloroform-*d*) δ 138.0, 137.9, 136.8 (d, *J*<sub>C-P</sub> = 1.7 Hz), 135.9 (d, *J*<sub>C-P</sub> = 5.9 Hz), 134.4 (d, *J*<sub>C-P</sub> = 11.5 Hz), 132.4 (d, *J*<sub>C-P</sub> = 37.4 Hz), 131.9, 131.8, 131.8 (d, *J*<sub>C-P</sub> = 2.4 Hz), 131.7, 131.6, 131.5, 131.3, 129.4, 128.8, 128.5, 128.4, 128.2, 128.1, 127.3, 127.3, 124.4, 52.4 (d, *J*<sub>C-P</sub> = 65.4 Hz), 21.4, 21.3. <sup>31</sup>P NMR (162 MHz, Chloroform-*d*) δ = 32.12. IR (KBr): 3054.47, 3024.56, 2916.86, 1599.53, 1437.54, 1176.57, 1117.89, 1102.86, 965.14, 852.47, 837.77, 749.53, 722.66, 704.54 cm<sup>-1</sup>. HRMS (ESI/[M+H]<sup>+</sup>) Calcd. for: C<sub>31</sub>H<sub>32</sub>OP 451.2191, found 451.2187.

**(E)-(1,3-bis(4-(tert-butyl)phenyl)allyl)diphenylphosphine oxide (3h)**

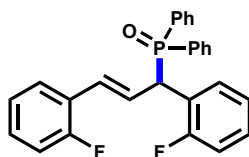

**3h** was known compounds<sup>3</sup>. Following the general procedure, the reaction was stirred at 120 °C (oil bath) for 12h. **3h** was isolated by PTLC (Petroleum ether (bp: 60-90 °C)/ethyl acetate = 1/1) as white

solid (35 mg, 41% yield), Mp: 180-182 °C. <sup>1</sup>H NMR (400 MHz, Chloroform-*d*) δ 7.92 – 7.87 (m, 3H), 7.66 – 7.61 (m, 2H), 7.52 – 7.46 (m, 3H), 7.40 – 7.28 (m, 4H), 7.16 – 7.08 (m, 3H), 7.00 (td, *J* = 7.6, 0.9 Hz, 1H), 6.95 – 6.82 (m, 2H), 6.62 (ddd, *J* = 15.5, 9.0, 6.3 Hz, 1H), 6.51 (dd, *J* = 16.0, 3.6 Hz, 1H), 4.90 (t, *J* = 8.8 Hz, 1H). <sup>13</sup>C NMR (101 MHz, Chloroform-*d*) δ 159.5 (d, *J*<sub>C-F</sub> = 250.48 Hz), 159.8 (dd, *J*<sub>C-F</sub>, *J*<sub>C-P</sub> = 245.43, 6.7 Hz), 132.0 (d, *J*<sub>C-P</sub> = 2.0 Hz), 131.8 (d, *J*<sub>C-P</sub> = 2.5 Hz), 131.6, 131.6, 131.0, 131.0, 130.8 (d, *J*<sub>C-P</sub> = 3.5 Hz), 129.1 (d, *J*<sub>C-P</sub> = 8.4 Hz), 128.8 (d, *J*<sub>C-P</sub> = 8.7 Hz), 128.7, 128.6, 128.4, 128.3, 127.4 (dd, *J*<sub>C-F</sub>, *J*<sub>C-P</sub> = 5.4, 4.5 Hz), 125.9 (dd, *J*<sub>C-F</sub>, *J*<sub>C-P</sub> = 7.1, 4.3 Hz), 124.6, 124.4 (d, d, *J*<sub>C-P</sub> = 11.9 Hz), 124.1, 124.1, 123.3 (dd, *J*<sub>C-F</sub>, *J*<sub>C-P</sub> = 14.5, 5.5 Hz), 115.7, 115.5, 115.3, 115.1, 43.2 (d, d, *J*<sub>C-P</sub> = 66.5 Hz). <sup>31</sup>P NMR (162 MHz, Chloroform-*d*) δ = 32.53. <sup>19</sup>F NMR (376 MHz, Chloroform-*d*) δ -118.30, -118.47. IR (KBr): 3057.51, 2925.29, 1488.34, 1455.53, 1437.75, 1231.50, 1192.29, 1117.55, 1103.38, 966.50, 805.08, 721.23, 706.71, 695.45 cm<sup>-1</sup>. HRMS (ESI/[M+H]<sup>+</sup>) Calcd. for: C<sub>27</sub>H<sub>22</sub>F<sub>2</sub>OP 431.1376, found 431.1377.

**(E)-(1,3-bis(3-fluorophenyl)allyl)diphenylphosphine oxide(3i)**

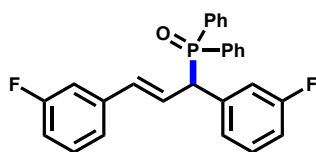

**3i** was known compounds<sup>3, 4</sup>. Following the general procedure, the reaction was stirred at 100 °C (oil bath) for 12h. **3i** was isolated by PTLC (Petroleum ether (bp: 60-90 °C)/ethyl acetate = 1/1) as white solid (39 mg, 45% yield), Mp: 188-191 °C. <sup>1</sup>H NMR (400 MHz, Chloroform-*d*) δ 7.88 – 7.83 (m, 2H), 7.62 – 7.57 (m, 2H), 7.54 – 7.45 (m, 3H), 7.43 – 7.39 (m, 1H), 7.35 – 7.31 (m, 2H), 7.21 – 7.09 (m, 4H), 6.97 (d, *J* = 7.7 Hz, 1H), 6.91 – 6.85 (m, 3H), 6.54 (ddd, *J* = 16.0, 9.1, 7.1 Hz, 1H), 6.27 (dd, *J* = 15.7, 3.8 Hz, 1H), 4.36 (t, *J* = 9.2 Hz, 1H). <sup>13</sup>C NMR (101 MHz, Chloroform-*d*) δ 163.0 (d, *J*<sub>C-F</sub> = 246.4 Hz), 162.7 (d, *J*<sub>C-F</sub> = 247.5 Hz), 138.8 (dd, *J*<sub>C-F</sub>, *J*<sub>C-P</sub> = 7.6, 1.7 Hz), 138.2 (dd, *J*<sub>C-F</sub>, *J*<sub>C-P</sub> = 6.6 Hz), 133.7 (dd, *J*<sub>C-F</sub>, *J*<sub>C-P</sub> = 10.9, 1.8 Hz), 132.1 (d, *J*<sub>C-P</sub> = 2.8 Hz), 131.9 (d, *J*<sub>C-P</sub> = 2.9 Hz), 131.8, 131.7, 131.6, 131.3, 131.3, 130.7 (d, *J*<sub>C-P</sub> = 19.4 Hz), 130.1 (dd, *J*<sub>C-F</sub>, *J*<sub>C-P</sub> = 12.1, 8.3 Hz), 128.7, 128.6, 128.5, 128.4, 125.6 (d, *J*<sub>C-P</sub> = 7.3 Hz), 125.2 (dd, *J*<sub>C-F</sub>, *J*<sub>C-P</sub> = 5.3, 3.0 Hz), 122.3, 116.6 (d, *J*<sub>C-P</sub> = 5.8 Hz), 116.4 (d, *J*<sub>C-P</sub> = 5.7 Hz), 114.7 (d, *J*<sub>C-P</sub> = 21.3 Hz), 114.3 (d, *J*<sub>C-P</sub> = 21.2 Hz), 113.0 (d, *J*<sub>C-P</sub> = 21.7 Hz), 52.0 (d, *J*<sub>C-P</sub> = 64.6 Hz). <sup>31</sup>P NMR (162 MHz, Chloroform-*d*) δ = 31.86. <sup>19</sup>F NMR (376 MHz, Chloroform-*d*) δ = -112.22, -113.35. IR (KBr): 3057.01, 2917.62, 1609.67, 1584.94, 1486.34, 1447.49, 1437.53, 1253.42, 1173.94, 1118.12, 962.62, 780.96, 718.85, 699.85 cm<sup>-1</sup>. HRMS (ESI/[M+H]<sup>+</sup>) Calcd. for: C<sub>27</sub>H<sub>22</sub>F<sub>2</sub>OP 431.1376, found 431.1374.

**(E)-(1,3-bis(4-fluorophenyl)allyl)diphenylphosphine oxide(3j)**

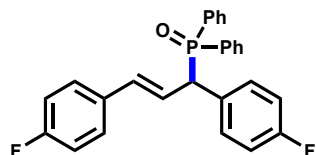

**3j** was known compounds<sup>3, 4, 5</sup>. Following the general procedure, the reaction was stirred at 100 °C (oil bath) for 12h. **3j** was isolated by PTLC (Petroleum ether (bp: 60-90 °C)/ethyl acetate = 1/1) as white solid (83 mg, 96% yield), Mp: 167-168 °C. <sup>1</sup>H NMR (400 MHz, Chloroform-*d*) δ 7.89 – 7.84 (m, 2H), 7.60 – 7.55 (m, 2H), 7.51 – 7.44 (m, 3H), 7.41 – 7.29 (m, 5H), 7.17 – 7.14 (m, 2H), 6.91 (ddd, *J* = 8.7, 5.1, 2.8 Hz, 4H), 6.45 (ddd, *J* = 15.8, 8.8, 7.0 Hz, 1H), 6.27 (dd, *J* = 15.9, 3.7 Hz, 1H), 4.36 (t, *J* = 9.2 Hz, 1H). <sup>13</sup>C NMR (101 MHz, Chloroform-*d*) δ 162.4 (d, *J*<sub>C-F</sub> = 248.5 Hz), 162.0 (d, *J*<sub>C-F</sub> = 246.4 Hz), 133.4 (d, *J*<sub>C-P</sub> = 11.2 Hz), 132.8, 132.0 (d, *J*<sub>C-P</sub> = 22.2 Hz), 132.0 (d, *J*<sub>C-P</sub> = 2.3 Hz), 131.8 (d, *J*<sub>C-P</sub> = 2.4

Hz), 131.7, 131.6, 131.3, 131.2, 131.1, 131.1, 131.0, 130.9, 128.7, 128.6, 128.5, 128.4, 128.0, 128.0, 124.2 (d,  $J_{C-P}$  = 6.8 Hz), 115.7, 115.6, 115.5, 115.4, 51.3 (d,  $J_{C-P}$  = 65.1 Hz).  $^{31}\text{P}$  NMR (162 MHz, Chloroform-*d*)  $\delta$  = 32.12.  $^{19}\text{F}$  NMR (376 MHz, Chloroform-*d*)  $\delta$  = -113.93, -114.95. IR (KBr): 3056.68, 2907.52, 1600.28, 1508.36, 1437.36, 1244.90, 1184.16, 1159.33, 1117.74, 1101.40, 968.44, 843.97, 819.72, 767.64, 734.17, 705.12  $\text{cm}^{-1}$ . HRMS (ESI/[M+H] $^{+}$ ) Calcd. for:  $\text{C}_{27}\text{H}_{22}\text{F}_2\text{OP}$  431.1376, found 431.1376.

**(E)-(1,3-bis(4-chlorophenyl)allyl)diphenylphosphine oxide (3k)**

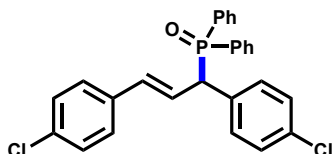

**3k** was known compounds<sup>4, 5</sup>. Following the general procedure, the reaction was stirred at 100 °C (oil bath) for 12h. **3k** was isolated by PTLC (Petroleum ether (bp: 60-90 °C)/ethyl acetate = 1/1) as white solid (83 mg, 90% yield), Mp: 188-189 °C.  $^1\text{H}$  NMR (400 MHz, Chloroform-*d*)  $\delta$  7.85 – 7.80 (m, 2H), 7.61 – 7.54 (m, 2H), 7.53 – 7.41 (m, 4H), 7.36 – 7.32 (m, 6H), 7.25 – 7.22 (m, 2H), 7.05 (d,  $J$  = 8.5 Hz, 2H), 6.48 (ddd,  $J$  = 15.8, 8.9, 6.9 Hz, 1H), 6.20 (dd,  $J$  = 15.8, 3.8 Hz, 1H), 4.29 (t,  $J$  = 9.4 Hz, 1H).  $^{13}\text{C}$  NMR (101 MHz, Chloroform-*d*)  $\delta$  135.0, 134.4 (d,  $J_{C-P}$  = 6.3 Hz), 133.6, 133.5, 133.5, 133.3, 132.1, 131.9, 131.7, 131.6, 131.6 (d,  $J_{C-P}$  = 82.8 Hz), 131.3, 131.2, 130.8, 130.8, 128.9, 128.7, 128.6, 128.5, 128.4, 127.7, 124.9 (d,  $J_{C-P}$  = 7.0 Hz), 51.6 (d,  $J_{C-P}$  = 64.6 Hz).  $^{31}\text{P}$  NMR (162 MHz, Chloroform-*d*)  $\delta$  = 31.86. IR (KBr): 3055.07, 2915.95, 1489.64, 1437.48, 1186.91, 1117.63, 1092.65, 1014.18, 966.73, 821.86, 797.78, 723.40, 702.49  $\text{cm}^{-1}$ . HRMS (ESI/[M+H] $^{+}$ ) Calcd. for:  $\text{C}_{27}\text{H}_{22}\text{Cl}_2\text{OP}$  463.0785, found 463.0788.

**(E)-(1,3-bis(4-bromophenyl)allyl)diphenylphosphine oxide (3l)**

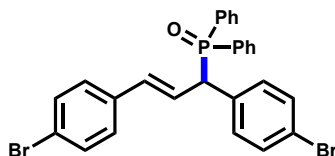

**3l** was known compounds<sup>3, 4, 5</sup>. Following the general procedure, the reaction was stirred at 100 °C (oil bath) for 12h. **3l** was isolated by PTLC (Petroleum ether (bp: 60-90 °C)/ethyl acetate = 1/1) as white solid (104 mg, 94% yield), Mp: 203-205 °C.  $^1\text{H}$  NMR (400 MHz, Chloroform-*d*)  $\delta$  7.86 – 7.80 (m, 2H), 7.62 – 7.55 (m, 2H), 7.54 – 7.40 (m, 4H), 7.39 – 7.30 (m, 6H), 7.24 (dd,  $J$  = 8.4, 1.7 Hz, 2H), 7.05 (d,  $J$  = 8.2 Hz, 2H), 6.49 (ddd,  $J$  = 16.0, 9.0, 7.0 Hz, 1H), 6.21 (dd,  $J$  = 15.8, 3.8 Hz, 1H), 4.30 (t,  $J$  = 9.2 Hz, 1H).  $^{13}\text{C}$  NMR (101 MHz, Chloroform-*d*)  $\delta$  135.4, 134.9 (d,  $J_{C-P}$  = 6.3 Hz), 133.6, 133.5, 132.1, 131.9, 131.8, 131.7, 131.6, 131.3, 131.2, 131.2, 131.1, 130.8 (d,  $J_{C-P}$  = 14.1 Hz), 128.7, 128.6, 128.6, 128.4, 128.0, 124.9 (d,  $J_{C-P}$  = 7.3 Hz), 121.7, 121.4, 51.7 (d,  $J_{C-P}$  = 64.6 Hz).  $^{31}\text{P}$  NMR (162 MHz, Chloroform-*d*)  $\delta$  = 31.73. IR (KBr): 3054.04, 2912.51, 1647.38, 1486.10, 1436.71, 1187.88, 1170.30, 1118.30, 1102.70, 1109.91, 971.13, 815.86, 793.13, 748.85, 721.72, 692.53  $\text{cm}^{-1}$ . HRMS (ESI/[M+H] $^{+}$ ) Calcd. for:  $\text{C}_{27}\text{H}_{22}\text{Br}_2\text{OP}$  550.9775, found 550.9775.

**(E)-(1,3-di(naphthalen-2-yl)allyl)diphenylphosphine oxide (3m)**

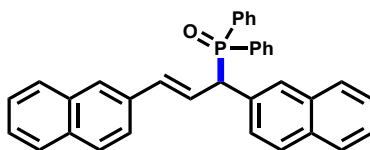

**3m** was known compounds<sup>4,5</sup>. Following the general procedure, the reaction was stirred at 100 °C (oil bath) for 2h. **3m** was isolated by PTLC (Petroleum ether (bp: 60-90 °C)/ethyl acetate = 1/1) as white solid (64 mg, 65% yield), Mp: 235-236 °C. <sup>1</sup>H NMR (400 MHz, Chloroform-*d*) δ 7.93 – 7.85 (m, 3H), 7.78 – 7.67 (m, 6H), 7.67 – 7.60 (m, 2H), 7.57 – 7.52 (m, 2H), 7.52 – 7.38 (m, 8H), 7.38 – 7.32 (m, 1H), 7.31 – 7.23 (m, 2H), 6.79 (ddd, *J* = 16.0, 9.1, 7.0 Hz, 1H), 6.48 (dd, *J* = 15.8, 3.8 Hz, 1H), 4.59 (t, *J* = 9.4 Hz, 1H). <sup>13</sup>C NMR (101 MHz, Chloroform-*d*) δ 134.7 (d, *J*<sub>C-P</sub> = 11.4 Hz), 134.2, 133.6 (d, *J*<sub>C-P</sub> = 6.4 Hz), 133.5, 133.0, 132.5, 132.2 (d, *J*<sub>C-P</sub> = 7.1 Hz), 132.00, 131.9, 131.8, 131.7, 131.5, 131.4, 131.2 (d, *J*<sub>C-P</sub> = 7.0 Hz), 128.7, 128.6, 128.6, 128.4, 128.4, 128.3, 128.2, 128.0, 127.7, 127.6 (d, *J*<sub>C-P</sub> = 4.9 Hz), 126.4, 126.3, 126.2, 126.0, 126.0, 125.0 (d, *J*<sub>C-P</sub> = 7.3 Hz), 123.7, 52.6 (d, *J*<sub>C-P</sub> = 65.3 Hz). <sup>31</sup>P NMR (162 MHz, Chloroform-*d*) δ = 32.07. IR (KBr): 3005.79, 2989.41, 1596.64, 1437.01, 1275.39, 1260.44, 1180.15, 1116.76, 961.42, 841.29, 764.18, 749.63, 697.48 cm<sup>-1</sup>. HRMS (ESI/[M+H]<sup>+</sup>) Calcd. for: C<sub>35</sub>H<sub>28</sub>OP 495.1878, found 495.1873.

**(E)-(2-methyl-1,3-diphenylallyl)diphenylphosphine oxide (3n)**

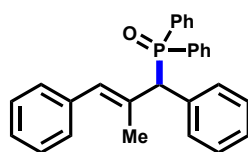

**3n** was known compounds<sup>3</sup>. Following the general procedure, the reaction was stirred at 100 °C (oil bath) for 2h. **3n** was isolated by PTLC (Petroleum ether (bp: 60-90 °C)/ethyl acetate = 1/1) as white solid (53 mg, 65% yield), Mp: 227-228 °C. <sup>1</sup>H NMR (400 MHz, Chloroform-*d*) δ 7.90 – 7.83 (m, 2H), 7.64 – 7.55 (m, 2H), 7.55 – 7.42 (m, 5H), 7.41 – 7.34 (m, 1H), 7.33 – 7.27 (m, 2H), 7.26 – 7.18 (m, 5H), 7.14 (t, *J* = 7.3 Hz, 1H), 6.95 (d, *J* = 7.3 Hz, 2H), 6.69 (s, 1H), 4.23 (d, *J* = 8.8 Hz, 1H), 1.90 (s, 3H). <sup>13</sup>C NMR (101 MHz, Chloroform-*d*) δ 137.8, 135.7 (d, *J*<sub>C-P</sub> = 4.8 Hz), 134.6 (d, *J*<sub>C-P</sub> = 6.1 Hz), 133.4 (d, *J*<sub>C-P</sub> = 26.3 Hz), 132.5, 131.6, 131.4, 131.3, 131.3, 131.2, 130.9, 130.8, 130.3, 130.2, 128.9, 128.5, 128.5, 128.4, 128.3, 128.0, 127.2, 126.4, 56.5 (d, *J*<sub>C-P</sub> = 66.7 Hz), 18.2 (d, *J*<sub>C-P</sub> = 4.9 Hz). <sup>31</sup>P NMR (162 MHz, Chloroform-*d*) δ = 32.31. IR (KBr): 3055.39, 3023.91, 2921.66, 1598.29, 1491.48, 1437.24, 1174.73, 1116.82, 1071.44, 920.47, 720.40, 699.48 cm<sup>-1</sup>. HRMS (ESI/[M+H]<sup>+</sup>) Calcd. for: C<sub>28</sub>H<sub>26</sub>OP 409.1721, found 409.1725.

**(E)-(1,3-di(thiophen-2-yl)allyl)diphenylphosphine oxide (3o)**

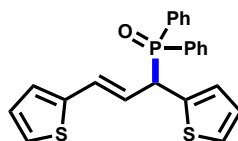

**3o** was known compounds<sup>3</sup>. Following the general procedure, the reaction was stirred at 100 °C (oil bath) for 2h. **3o** was isolated by PTLC (Petroleum ether (bp: 60-90 °C)/ethyl acetate = 1/1) as white solid (76 mg, 94% yield), Mp: 192-193 °C. <sup>1</sup>H NMR (400 MHz, Chloroform-*d*) δ 7.84 – 7.76 (m, 2H), 7.73 – 7.66 (m, 2H), 7.54 – 7.41 (m, 4H), 7.40 – 7.33 (m, 2H), 7.11 (dd, *J* = 13.4, 5.1 Hz, 2H), 7.04 (t, *J* = 2.6 Hz, 1H), 6.88 (ddd, *J* = 6.1, 5.2, 3.6 Hz, 2H), 6.80 (d, *J* = 3.5 Hz, 1H), 6.48 (dd, *J* = 15.6, 3.8 Hz, 1H), 6.27 (ddd, *J* = 15.4, 8.6, 6.4 Hz, 1H), 4.67 (dd, *J* = 12.3, 8.6 Hz, 1H). <sup>13</sup>C NMR (101 MHz, Chloroform-*d*) δ 141.5 (d, *J*<sub>C-P</sub> = 3.0 Hz), 136.9 (d, *J*<sub>C-P</sub> = 5.9 Hz), 132.1 (d, *J*<sub>C-P</sub> = 2.8 Hz), 131.9 (d, *J*<sub>C-P</sub> = 2.8 Hz), 131.9, 131.8, 131.6, 131.5, 130.8 (d, *J*<sub>C-P</sub> = 30.1 Hz), 128.7, 128.6, 128.5, 128.4, 127.8 (d, *J*<sub>C-P</sub> = 10.8 Hz), 127.4, 127.3 (d, *J*<sub>C-P</sub> = 5.9 Hz), 127.2 (d, *J*<sub>C-P</sub> = 2.4 Hz), 126.0, 125.1 (d, *J*<sub>C-P</sub> = 2.7 Hz), 124.7, 123.5 (d, *J*<sub>C-P</sub> = 6.7 Hz), 47.2 (d, *J*<sub>C-P</sub> = 66.3 Hz). <sup>31</sup>P NMR (162 MHz, Chloroform-*d*) δ = 31.10. IR (KBr): 3054.71, 2909.16, 1486.96, 1275.02, 1260.85, 1179.22, 1118.22, 953.99, 763.24, 749.15,



721.37, 694.51  $\text{cm}^{-1}$ . HRMS (ESI/[M+H]<sup>+</sup>) Calcd. for: C<sub>23</sub>H<sub>20</sub>OPS<sub>2</sub> 407.0693, found 407.0695.

**(E)-(1-(benzo[d][1,3]dioxol-5-yl)-4,4-dimethylpent-1-en-3-yl)diphenylphosphine oxide (3p)**

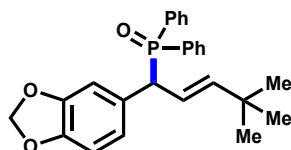

**3p** was known compounds<sup>3</sup>. Following the general procedure, the reaction was stirred at 100 °C (oil bath) for 12h. **3p** was isolated by PTLC (Petroleum ether (bp: 60-90 °C)/ethyl acetate = 1/1) as white solid (59 mg, 71% yield), Mp: 248-251 °C. <sup>1</sup>H NMR (400 MHz, Chloroform-*d*)  $\delta$  7.85 – 7.77 (m, 2H), 7.66 – 7.57 (m, 2H), 7.54 – 7.38 (m, 4H), 7.38 – 7.30 (m, 2H), 6.90, 6.75 – 6.59 (m, 1H), 5.90, 5.70 – 5.59 (m, 2H), 5.34 (dd,  $J$  = 15.5, 3.9 Hz, 2H), 4.04 (t,  $J$  = 9.3 Hz, 1H), 0.78 (s, 9H). <sup>13</sup>C NMR (101 MHz, Chloroform-*d*)  $\delta$  147.6, 147.0, 146.9, 146.6, 132.4 (d,  $J_{C-P}$  = 43.8 Hz), 131.9, 131.8, 131.7, 131.6, 131.4, 131.3, 130.1 (d,  $J_{C-P}$  = 6.0 Hz), 128.4, 128.2, 122.6 (d,  $J_{C-P}$  = 6.8 Hz), 119.4 (d,  $J_{C-P}$  = 6.6 Hz), 109.8 (d,  $J_{C-P}$  = 5.5 Hz), 108.3, 101.0, 51.8 (d,  $J_{C-P}$  = 65.6 Hz), 33.3, 29.2. <sup>31</sup>P NMR (162 MHz, Chloroform-*d*)  $\delta$  = 32.44. IR (KBr): 3054.84, 2956.76, 1501.97, 1501.97, 1486.64, 1437.90, 1363.27, 1249.76, 1175.66, 1116.40, 1039.79, 970.82, 931.36, 718.70, 698.45  $\text{cm}^{-1}$ . HRMS (ESI/[M+H]<sup>+</sup>) Calcd. for: C<sub>26</sub>H<sub>28</sub>O<sub>3</sub>P 419.1776, found 419.1774.

**(E)-(3-(4-bromophenyl)-1-phenylallyl)diphenylphosphine oxide (3q) and (E)-(1-(4-bromophenyl)-3-phenylallyl)diphenylphosphine oxide (3q')**

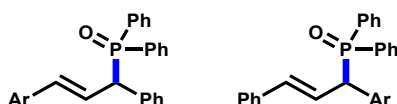

(Ar=4-BrC<sub>6</sub>H<sub>4</sub>) 3q:3q'=1:1

**3q** and **3q'** was known compounds<sup>3,5</sup>. Following the general procedure, the reaction was stirred at 100 °C (oil bath) for 12h. **3q** and **3q'** was isolated by PTLC (Petroleum ether (bp: 60-90 °C)/ethyl acetate = 1/1) as white solid (62 mg, 65% yield), Mp: 178-179 °C. <sup>1</sup>H NMR (400 MHz, Chloroform-*d*, **3q+3q'**)  $\delta$  7.88 – 7.81 (m, 4H), 7.63 – 7.53 (m, 4H), 7.51 – 7.42 (m, 6H), 7.42 – 7.28 (m, 12H), 7.25 – 7.14 (m, 10H), 7.05 (d,  $J$  = 8.4 Hz, 2H), 6.63 – 6.46 (m, 2H), 6.30 (dd,  $J$  = 15.8, 3.7 Hz, 1H), 6.23 (dd,  $J$  = 15.8, 3.8 Hz, 1H), 4.36 (t,  $J$  = 9.3 Hz, 2H). <sup>13</sup>C NMR (101 MHz, Chloroform-*d*, 3q+3q')  $\delta$  136.6 (d,  $J_{C-P}$  = 2.4 Hz), 135.7 (d,  $J_{C-P}$  = 5.8 Hz), 135.7 (d,  $J_{C-P}$  = 2.4 Hz), 135.2 (d,  $J_{C-P}$  = 5.8 Hz), 134.9, 134.8, 133.3, 133.2, 132.0 (d,  $J_{C-P}$  = 3.0 Hz), 132.0 (d,  $J_{C-P}$  = 2.8 Hz), 131.8 (d,  $J_{C-P}$  = 2.8 Hz), 131.8, 131.8, 131.8, 131.8, 131.7, 131.7, 131.6, 131.4, 131.4, 131.3, 131.3, 131.2, 131.2, 129.6, 129.5, 128.7, 128.7, 128.69, 128.6, 128.6, 128.5, 128.4, 128.4, 128.3, 128.0, 128.0, 127.9, 127.3 (d,  $J_{C-P}$  = 2.3 Hz), 126.5 (d,  $J_{C-P}$  = 1.7 Hz), 125.6 (d,  $J_{C-P}$  = 7.3 Hz), 124.1 (d,  $J_{C-P}$  = 7.1 Hz), 121.5 (d,  $J_{C-P}$  = 1.2 Hz), 121.3 (d,  $J_{C-P}$  = 2.9 Hz), 52.4 (d,  $J_{C-P}$  = 64.7 Hz), 51.7 (d,  $J_{C-P}$  = 64.8 Hz). <sup>31</sup>P NMR (162 MHz, Chloroform-*d*, 3q+3q')  $\delta$  = 32.06, 31.66. <sup>1</sup>H NMR (401 MHz, Chloroform-*d*)  $\delta$  7.88 – 7.81 (m, 2H), 7.63 – 7.56 (m, 2H), 7.54 – 7.38 (m, 4H), 7.37 – 7.30 (m, 4H), 7.25 – 7.15 (m, 7H), 6.51 (ddd,  $J$  = 16.0, 9.0, 7.1 Hz, 1H), 6.30 (dd,  $J$  = 15.8, 3.7 Hz, 1H), 4.35 (d,  $J$  = 9.0 Hz, 1H). <sup>13</sup>C NMR (101 MHz, Chloroform-*d*)  $\delta$  136.5 (d,  $J_{C-P}$  = 2.3 Hz), 135.2 (d,  $J_{C-P}$  = 6.2 Hz), 134.9, 134.8, 132.1, 132.0, 131.8 (d,  $J_{C-P}$  = 2.9 Hz), 131.8, 131.7, 131.7, 131.4, 131.3, 131.2, 131.1, 130.9 (d,  $J_{C-P}$  = 30.3 Hz), 128.7, 128.6, 128.5, 127.9, 126.5, 126.5, 124.0 (d,  $J_{C-P}$  = 7.2 Hz), 121.3, 51.7 (d,  $J_{C-P}$  = 64.6 Hz). <sup>31</sup>P NMR (162 MHz, Chloroform-*d*)  $\delta$  = 31.68. IR (KBr): 3056.34, 3025.71, 2920.53, 2850.08, 1484.22, 1437.12, 1169.07, 1117.96, 1011.21, 965.62, 825.08, 721.51, 692.18  $\text{cm}^{-1}$ . HRMS (ESI/[M+H]<sup>+</sup>) Calcd. for: C<sub>27</sub>H<sub>23</sub>BrOP 473.0670, found 473.0680.

**(E)-(1,3-diphenylallyl)di-p-tolylphosphine oxide (3t)**



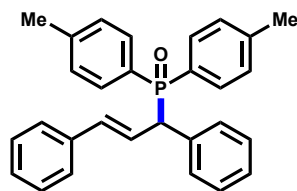

**3t** was known compounds<sup>3, 5</sup>. Following the general procedure, the reaction was stirred at 100 °C (oil bath) for 2h. **3t** was isolated by PTLC (Petroleum ether (bp: 60-90 °C)/ethyl acetate = 1/1) as white solid (61 mg, 72% yield), Mp: 210-211 °C. <sup>1</sup>H NMR (400 MHz, Chloroform-*d*) δ 7.71 (dd, *J* = 10.6, 8.1 Hz, 2H), 7.44 (dd, *J* = 10.9, 8.1 Hz, 2H), 7.34 (d, *J* = 8.0 Hz, 2H), 7.27 – 7.19 (m, 8H), 7.19 – 7.13 (m, 2H), 7.09 (dd, *J* = 7.9, 2.8 Hz, 2H), 6.59 (ddd, *J* = 16.0, 9.1, 7.0 Hz, 1H), 6.33 (dd, *J* = 15.7, 3.7 Hz, 1H), 4.34 (t, *J* = 9.6 Hz, 1H), 2.36 (s, 3H), 2.28 (s, 3H). <sup>13</sup>C NMR (101 MHz, Chloroform-*d*) δ 142.2 (d, *J*<sub>C-P</sub> = 2.5 Hz), 141.9 (d, *J*<sub>C-P</sub> = 2.5 Hz), 136.9 (d, *J*<sub>C-P</sub> = 1.9 Hz), 136.3 (d, *J*<sub>C-P</sub> = 5.8 Hz), 134.3 (d, *J*<sub>C-P</sub> = 11.4 Hz), 131.8, 131.8, 131.5, 131.4, 129.6, 129.6, 129.3, 129.2, 129.1, 128.9, 128.6, 128.5, 128.1 (d, *J*<sub>C-P</sub> = 39.1 Hz), 127.6, 127.1, 126.5, 125.1 (d, *J*<sub>C-P</sub> = 7.0 Hz), 52.5 (d, *J*<sub>C-P</sub> = 65.1 Hz), 21.7, 21.6. <sup>31</sup>P NMR (162 MHz, Chloroform-*d*) δ = 32.41. IR (KBr): 3023.73, 2918.33, 1600.14, 1439.64, 1452.82, 1275.46, 1260.49, 1171.46, 1115.48, 964.99, 764.24, 749.21, 700.54, 660.11 cm<sup>-1</sup>. HRMS (ESI/[M+H]<sup>+</sup>) Calcd. for: C<sub>29</sub>H<sub>28</sub>OP 423.1878, found 423.1873.

**(E)-(1,3-diphenylallyl)bis(4-fluorophenyl)phosphine oxide (3u)**

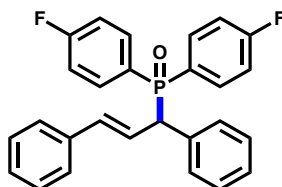

**3u** was known compounds<sup>3, 5</sup>. Following the general procedure, the reaction was stirred at 100 °C (oil bath) for 2h. **3u** was isolated by PTLC (Petroleum ether (bp: 60-90 °C)/ethyl acetate = 1/1) as white solid (70 mg, 81% yield), Mp: 195-197 °C. <sup>1</sup>H NMR (400 MHz, Chloroform-*d*) δ 7.88 – 7.78 (m, 2H), 7.54 (ddd, *J* = 10.4, 8.3, 5.5 Hz, 2H), 7.33 (d, *J* = 7.5 Hz, 2H), 7.24 – 7.12 (m, 10H), 7.03 – 6.96 (m, 2H), 6.57 (ddd, *J* = 16.1, 9.1, 7.0 Hz, 1H), 6.35 (dd, *J* = 15.9, 3.6 Hz, 1H), 4.32 (t, *J* = 9.3 Hz, 1H). <sup>13</sup>C NMR (101 MHz, Chloroform-*d*) δ 166.2 (d, *J*<sub>C-P</sub> = 22.5 Hz), 163.7 (d, *J*<sub>C-P</sub> = 23.8 Hz), 136.5, 135.6 (d, *J*<sub>C-P</sub> = 6.0 Hz), 134.9, 134.8, 134.0 (dd, *J*<sub>C-F,C-P</sub> = 39.2, 18.4 Hz), 134.0 (d, *J*<sub>C-P</sub> = 39.1 Hz), 129.5 (d, *J*<sub>C-P</sub> = 5.3 Hz), 128.8, 128.6, 127.9, 127.5, 126.5, 124.1 (d, *J*<sub>C-P</sub> = 7.3 Hz), 116.1 (dd, *J*<sub>C-F,C-P</sub> = 19.4, 10.3 Hz), 115.8 (dd, *J*<sub>C-F,C-P</sub> = 19.2, 10.4 Hz), 52.7 (d, *J*<sub>C-P</sub> = 66.3 Hz). <sup>31</sup>P NMR (162 MHz, Chloroform-*d*) δ = 31.13. <sup>19</sup>F NMR (376 MHz, Chloroform-*d*) δ = -106.32, -106.56. IR (KBr): 3060.41, 3029.41, 1593.09, 1498.76, 1453.17, 1397.47, 1234.80, 1187.25, 1161.69, 1115.85, 1094.42, 965.78, 829.92, 747.26, 699.42, 663.57 cm<sup>-1</sup>. HRMS (ESI/[M+H]<sup>+</sup>) Calcd. for: C<sub>27</sub>H<sub>22</sub>F<sub>2</sub>OP 431.1376, found 431.1379.

**(E)-(1,3-diphenylallyl)bis(4-methoxyphenyl)phosphine oxide (3v)**

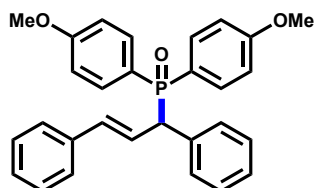

**3v** was known compounds<sup>3, 5</sup>. Following the general procedure, the reaction was stirred at 120 °C (oil bath) for 2h. **3v** was isolated by PTLC (Petroleum ether (bp: 60-90 °C)/ethyl acetate = 1/1) as white solid (64 mg, 70% yield), Mp: 224-225 °C. <sup>1</sup>H NMR (400 MHz, Chloroform-*d*) δ 7.73 (dd, *J* = 10.2,

8.8 Hz, 2H), 7.46 (dd,  $J = 10.5, 8.8$  Hz, 2H), 7.32 (d,  $J = 8.0$  Hz, 2H), 7.27 – 7.14 (m, 8H), 6.95 (dd,  $J = 8.8, 2.2$  Hz, 2H), 6.80 (dd,  $J = 8.8, 2.2$  Hz, 2H), 6.59 (ddd,  $J = 16.0, 9.1, 7.1$  Hz, 1H), 6.32 (dd,  $J = 15.7, 3.8$  Hz, 1H), 4.29 (t,  $J = 9.8$  Hz, 1H), 3.81 (s, 3H), 3.75 (s, 3H).  $^{13}\text{C}$  NMR (101 MHz, Chloroform-*d*)  $\delta$  162.3 (d,  $J_{\text{C-P}} = 2.8$  Hz), 162.1 (d,  $J_{\text{C-P}} = 2.9$  Hz), 136.9, 136.4 (d,  $J_{\text{C-P}} = 5.9$  Hz), 134.3, 134.1, 133.7, 133.6, 133.3, 133.2, 129.6, 129.5, 128.6, 128.5, 127.6, 127.1, 126.5, 125.1 (d,  $J_{\text{C-P}} = 6.9$  Hz), 123.9, 123.3, 122.9, 122.3, 114.1, 114.0, 113.9, 113.7, 55.4, 55.3, 53.0 (d,  $J_{\text{C-P}} = 65.9$  Hz).  $^{31}\text{P}$  NMR (162 MHz, Chloroform-*d*)  $\delta = 32.16$ . IR (KBr): 3025.28, 2907.17, 1596.63, 1570.61, 1501.92, 1453.00, 1292.63, 1253.68, 1178.25, 1166.68, 1119.85, 1100.45, 1025.92, 970.21, 825.83, 802.04, 746.68, 696.81  $\text{cm}^{-1}$ . HRMS (ESI/[M+H] $^{+}$ ) Calcd. for:  $\text{C}_{29}\text{H}_{28}\text{O}_3\text{P}$  455.1776, found 455.1773.

**(E)-bis(4-(tert-butyl)phenyl)(1,3-diphenylallyl)phosphine oxide (3w)**

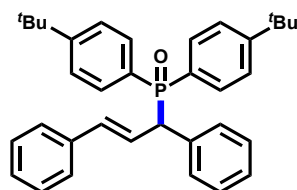

**3w** was known compounds<sup>3</sup>. Following the general procedure, the reaction was stirred at 100 °C (oil bath) for 2h. **3w** was isolated by PTLC (Petroleum ether (bp: 60-90 °C)/ethyl acetate = 1/1) as white solid (92 mg, 91% yield), Mp: 248-251 °C.  $^1\text{H}$  NMR (400 MHz, Chloroform-*d*)  $\delta$  7.77 – 7.70 (m, 2H), 7.52 – 7.44 (m, 4H), 7.35 – 7.29 (m, 4H), 7.24 – 7.16 (m, 8H), 6.57 (ddd,  $J = 16.0, 9.1, 7.0$  Hz, 1H), 6.27 (dd,  $J = 15.8, 3.7$  Hz, 1H), 4.33 (t,  $J = 9.7$  Hz, 1H), 1.31 (s, 9H), 1.25 (s, 9H).  $^{13}\text{C}$  NMR (101 MHz, Chloroform-*d*)  $\delta$  155.1 (d,  $J_{\text{C-P}} = 2.5$  Hz), 154.9 (d,  $J_{\text{C-P}} = 2.5$  Hz), 137.0, 136.4 (d,  $J_{\text{C-P}} = 5.9$  Hz), 134.3, 134.2, 131.8, 131.7, 131.4, 131.3, 129.6, 129.6, 129.1 (d,  $J_{\text{C-P}} = 35.7$  Hz), 128.5, 128.5, 128.1 (d,  $J_{\text{C-P}} = 35.9$  Hz), 127.6, 127.0, 126.5, 125.5, 125.4, 125.3, 125.2, 52.7 (d,  $J_{\text{C-P}} = 64.7$  Hz), 35.0, 35.0, 31.2, 31.1.  $^{31}\text{P}$  NMR (162 MHz, Chloroform-*d*)  $\delta = 32.35$ . IR (KBr): 3060.08, 3026.50, 2964.24, 2904.71, 2868.32, 1599.07, 1493.86, 1454.41, 1392.95, 1363.00, 1267.38, 1185.22, 1092.89, 1017.79, 968.89, 825.80, 777.20, 747.32, 699.20  $\text{cm}^{-1}$ . HRMS (ESI/[M+H] $^{+}$ ) Calcd. for:  $\text{C}_{35}\text{H}_{40}\text{OP}$  507.2817, found 507.2820.

**(E)-(1,3-diphenylallyl)bis(3-methoxyphenyl)phosphine oxide (3x)**

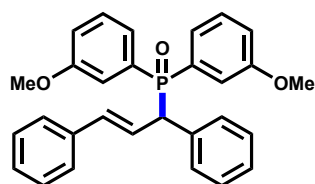

**3x** was known compounds<sup>3, 5</sup>. Following the general procedure, the reaction was stirred at 100 °C (oil bath) for 2h. **3x** was isolated by PTLC (Petroleum ether (bp: 60-90 °C)/ethyl acetate = 1/1) as white solid (65 mg, 71% yield), Mp: 164-165 °C.  $^1\text{H}$  NMR (400 MHz, Chloroform-*d*)  $\delta$  7.43 (dd,  $J = 12.2, 2.5$  Hz, 1H), 7.39 – 7.35 (m, 4H), 7.24 – 7.21 (m, 6H), 7.21 – 7.13 (m, 3H), 7.13 – 7.04 (m, 2H), 7.02 (dt,  $J = 6.0, 2.6$  Hz, 1H), 6.93 – 6.88 (m, 1H), 6.60 (ddd,  $J = 16.0, 9.1, 7.2$  Hz, 1H), 6.34 (dd,  $J = 15.7, 3.8$  Hz, 1H), 4.34 (t,  $J = 9.4$  Hz, 1H), 3.73 (s, 3H), 3.63 (s, 3H).  $^{13}\text{C}$  NMR (101 MHz, Chloroform-*d*)  $\delta$  159.6 (d,  $J_{\text{C-P}} = 14.1$  Hz), 159.3 (d,  $J_{\text{C-P}} = 14.3$  Hz), 136.8 (d,  $J_{\text{C-P}} = 2.4$  Hz), 136.1 (d,  $J_{\text{C-P}} = 5.8$  Hz), 134.5 (d,  $J_{\text{C-P}} = 11.4$  Hz), 133.4 (d,  $J_{\text{C-P}} = 36.0$  Hz), 132.5 (d,  $J_{\text{C-P}} = 36.2$  Hz), 129.7, 129.6, 129.6, 129.5, 129.3, 128.7, 128.5, 127.7, 127.2, 126.5, 124.7 (d,  $J_{\text{C-P}} = 7.1$  Hz), 123.7 (d,  $J_{\text{C-P}} = 9.2$  Hz), 123.4 (d,  $J_{\text{C-P}} = 8.9$  Hz), 118.4, 118.3 (d,  $J_{\text{C-P}} = 2.9$  Hz), 116.7 (d,  $J_{\text{C-P}} = 9.3$  Hz), 116.1 (d,  $J_{\text{C-P}} = 9.0$  Hz), 55.5, 55.4, 52.5 (d,  $J_{\text{C-P}} = 64.9$  Hz).  $^{31}\text{P}$  NMR (162 MHz, Chloroform-*d*)  $\delta = 32.51$ . IR (KBr): 3059.27,

3025.72, 2937.56, 2835.31, 1589.88, 1576.55, 1481.81, 1421.49, 1286.54, 1252.18, 1184.24, 1112.21, 1043.81, 965.92, 776.33, 747.80, 696.46  $\text{cm}^{-1}$ . HRMS (ESI/[M+H]<sup>+</sup>) Calcd. for: C<sub>29</sub>H<sub>28</sub>O<sub>3</sub>P 455.1776, found 455.1775.

**(E)-(1,3-diphenylallyl)bis(2-methoxyphenyl)phosphine oxide (3y)**

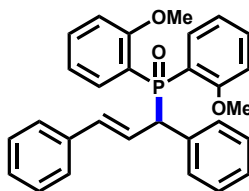

**3y** was known compounds<sup>3</sup>. Following the general procedure, the reaction was stirred at 100 °C (oil bath) for 2h. **3y** was isolated by PTLC (Petroleum ether (bp: 60-90 °C)/ethyl acetate = 1/1) as white solid (72 mg, 79% yield), Mp: 181-182 °C. <sup>1</sup>H NMR (400 MHz, Chloroform-*d*)  $\delta$  7.87 (ddd,  $J$  = 12.8, 7.6, 1.5 Hz, 1H), 7.62 (ddd,  $J$  = 13.1, 7.6, 1.6 Hz, 1H), 7.45 (d,  $J$  = 7.7 Hz, 2H), 7.39 (t,  $J$  = 7.7 Hz, 1H), 7.29 (t,  $J$  = 7.8 Hz, 1H), 7.23 (dd,  $J$  = 11.5, 7.3 Hz, 4H), 7.18 (d,  $J$  = 3.3 Hz, 1H), 7.16 – 7.12 (m, 2H), 7.07 (t,  $J$  = 7.3 Hz, 1H), 6.98 (t,  $J$  = 7.5 Hz, 1H), 6.88 – 6.73 (m, 3H), 6.73 – 6.66 (m, 1H), 6.46 (dd,  $J$  = 15.8, 3.5 Hz, 1H), 4.97 (dd,  $J$  = 12.4, 9.2 Hz, 1H), 3.69 (s, 3H), 3.62 (s, 3H). <sup>13</sup>C NMR (101 MHz, Chloroform-*d*)  $\delta$  160.3 (d,  $J_{C-P}$  = 3.5 Hz), 159.9 (d,  $J_{C-P}$  = 3.8 Hz), 138.0 (d,  $J_{C-P}$  = 5.9 Hz), 137.4, 134.6, 134.5, 134.3, 134.2, 133.3, 133.2, 132.9, 132.7, 129.5, 129.4, 128.4, 128.2, 127.3, 127.2, 127.1, 126.7, 126.4, 121.8 (d,  $J_{C-P}$  = 14.4 Hz), 120.7 (d,  $J_{C-P}$  = 10.5 Hz), 120.5 (d,  $J_{C-P}$  = 11.1 Hz), 111.0 (d,  $J_{C-P}$  = 6.7 Hz), 110.5 (d,  $J_{C-P}$  = 6.8 Hz), 55.5, 55.3, 51.0 (d,  $J_{C-P}$  = 69.3 Hz). <sup>31</sup>P NMR (162 MHz, Chloroform-*d*)  $\delta$  = 33.36. IR (KBr): 3059.39, 3024.97, 2936.64, 2835.44, 1589.12, 1576.63, 1478.99, 1430.95, 1275.65, 1251.35, 1179.29, 1162.34, 1073.01, 1021.86, 964.98, 802.37, 751.50, 697.26  $\text{cm}^{-1}$ . HRMS (ESI/[M+H]<sup>+</sup>) Calcd. for: C<sub>29</sub>H<sub>28</sub>O<sub>3</sub>P 455.1776, found 455.1776.

**(E)-(1,3-diphenylallyl)di-*o*-tolylphosphine oxide (3z)**

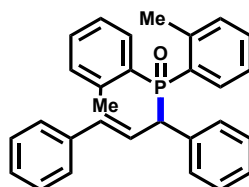

**3z** was known compounds<sup>3, 5</sup>. Following the general procedure, the reaction was stirred at 100 °C (oil bath) for 2h. **3z** was isolated by PTLC (Petroleum ether (bp: 60-90 °C)/ethyl acetate = 1/1) as white solid (69 mg, 82% yield), Mp: 167-169 °C. <sup>1</sup>H NMR (400 MHz, Chloroform-*d*)  $\delta$  7.69 (d,  $J$  = 11.4 Hz, 1H), 7.59 (t,  $J$  = 8.92 Hz, 1H), 7.42 – 7.26 (m, 6H), 7.25 – 7.19 (m, 6H), 7.20 – 7.13 (m, 4H), 6.58 (dt,  $J$  = 16.0, 7.8 Hz, 1H), 6.31 (dd,  $J$  = 15.7, 3.7 Hz, 1H), 4.35 (t,  $J$  = 9.5 Hz, 1H), 2.33 (s, 3H), 2.23 (s, 3H). <sup>13</sup>C NMR (101 MHz, Chloroform-*d*)  $\delta$  138.4 (d,  $J_{C-P}$  = 11.4 Hz), 138.1 (d,  $J_{C-P}$  = 11.5 Hz), 136.9, 136.2 (d,  $J_{C-P}$  = 6.2 Hz), 134.5, 134.4, 132.7, 132.6, 132.4 (d,  $J_{C-P}$  = 2.0 Hz), 132.3, 132.2, 131.9, 131.1 (d,  $J_{C-P}$  = 29.4 Hz), 129.6, 129.6, 128.6, 128.5, 128.3 (d,  $J_{C-P}$  = 8.6 Hz), 128.2 (d,  $J_{C-P}$  = 5.6 Hz), 128.0 (d,  $J_{C-P}$  = 12.1 Hz), 127.6, 127.2, 126.5, 124.9 (d,  $J_{C-P}$  = 7.3 Hz), 52.4 (d,  $J_{C-P}$  = 64.6 Hz), 21.5, 21.4. <sup>31</sup>P NMR (162 MHz, Chloroform-*d*)  $\delta$  = 32.45. IR (KBr): 3057.53, 3025.25, 2925.79, 1595.19, 1492.93, 1451.70, 1283.46, 1180.49, 1137.13, 1083.49, 1030.14, 967.20, 805.91, 748.14, 694.01  $\text{cm}^{-1}$ . HRMS (ESI/[M+H]<sup>+</sup>) Calcd. for: C<sub>29</sub>H<sub>28</sub>OP 423.1878, found 423.1873.

**(E)-bis(3,5-dimethylphenyl)(1,3-diphenylallyl)phosphine oxide (3aa)**

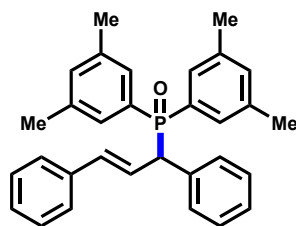

**3aa** was known compounds<sup>3, 5</sup>. Following the general procedure, the reaction was stirred at 120 °C (oil bath) for 2h. **3aa** was isolated by PTLC (Petroleum ether (bp: 60-90 °C)/ethyl acetate = 1/1) as white solid (37 mg, 41% yield), Mp: 210-212 °C. <sup>1</sup>H NMR (400 MHz, Chloroform-*d*) δ 7.44 (d, *J* = 11.1 Hz, 2H), 7.37 (d, *J* = 8.0 Hz, 2H), 7.23 – 7.11 (m, 10H), 7.09 (s, 1H), 6.97 (s, 1H), 6.57 (ddd, *J* = 15.9, 9.1, 6.9 Hz, 1H), 6.31 (dd, *J* = 15.8, 3.9 Hz, 1H), 4.35 (t, *J* = 9.5 Hz, 1H), 2.29 (s, 6H), 2.19(s, 6H). <sup>13</sup>C NMR (101 MHz, Chloroform-*d*) δ 138.1, 138.0, 137.9, 137.7, 137.0 (d, *J*<sub>C-P</sub> = 2.3 Hz), 136.4 (d, *J*<sub>C-P</sub> = 5.9 Hz), 134.4, 134.3, 133.5 (d, *J*<sub>C-P</sub> = 2.9 Hz), 133.3 (d, *J*<sub>C-P</sub> = 2.8 Hz), 131.9 (d, *J*<sub>C-P</sub> = 25.0 Hz), 131.0 (d, *J*<sub>C-P</sub> = 25.1 Hz), 129.7, 129.6, 129.5, 129.4, 129.2, 129.1, 128.5, 128.5, 127.6, 127.1, 126.5, 125.1 (d, *J*<sub>C-P</sub> = 7.0 Hz), 52.4 (d, *J*<sub>C-P</sub> = 64.4 Hz), 21.5, 21.3. <sup>31</sup>P NMR (162 MHz, Chloroform-*d*) δ = 32.80. IR (KBr): 3055.77, 3024.09, 2914.61, 1598.33, 1488.99, 1452.91, 1417.99, 1273.05, 1168.37, 1124.81, 963.68, 868.21, 849.85, 765.94, 697.76 cm<sup>-1</sup>. HRMS (ESI/[M+H]<sup>+</sup>) Calcd. for: C<sub>31</sub>H<sub>32</sub>OP 451.2191, found 451.2185.

**(E)-(1,3-diphenylallyl)di(naphthalen-2-yl)phosphine oxide (3ab)**

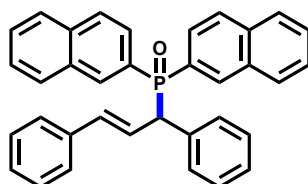

**3ab** was known compounds<sup>3</sup>. Following the general procedure, the reaction was stirred at 100 °C (oil bath) for 2h. **3ab** was isolated by PTLC (Petroleum ether (bp: 60-90 °C)/ethyl acetate = 1/1) as white solid (40 mg, 40% yield), Mp: 213-214 °C. <sup>1</sup>H NMR (400 MHz, Chloroform-*d*) δ 8.51 (d, *J* = 12.8 Hz, 1H), 8.21 (d, *J* = 13.0 Hz, 1H), 7.95 – 7.81 (m, 4H), 7.76 (t, *J* = 8.1 Hz, 3H), 7.63 (td, *J* = 8.7, 1.5 Hz, 1H), 7.58 – 7.39 (m, 6H), 7.23 – 7.10 (m, 8H), 6.68 (ddd, *J* = 16.0, 9.1, 7.1 Hz, 1H), 6.40 (dd, *J* = 15.7, 3.8 Hz, 1H), 4.62 (t, *J* = 9.5 Hz, 1H). <sup>13</sup>C NMR (101 MHz, Chloroform-*d*) δ 136.7 (d, *J*<sub>C-P</sub> = 1.8 Hz), 136.0 (d, *J*<sub>C-P</sub> = 5.9 Hz), 134.7, 134.6, 134.5 (d, *J*<sub>C-P</sub> = 1.7 Hz), 134.3, 134.2, 133.8, 133.7, 132.7 (d, *J*<sub>C-P</sub> = 12.6 Hz), 132.5 (d, *J*<sub>C-P</sub> = 12.6 Hz), 129.7, 129.6, 129.3, 129.1, 129.0, 128.8, 128.5, 128.3, 128.2, 128.1, 128.1, 127.9, 127.9, 127.8, 127.7, 127.3, 127.0, 126.8, 126.5, 126.4, 126.3, 126.2, 124.7 (d, *J*<sub>C-P</sub> = 6.9 Hz), 52.4 (d, *J*<sub>C-P</sub> = 65.1 Hz). <sup>31</sup>P NMR (162 MHz, Chloroform-*d*) δ = 32.32. IR (KBr): 3054.29, 3022.52, 2915.90, 1590.17, 1491.22, 1453.51, 1272.69, 1169.23, 1133.87, 1087.42, 968.81, 859.29, 819.43, 745.84, 719.60 cm<sup>-1</sup>. HRMS (ESI/[M+H]<sup>+</sup>) Calcd. for: C<sub>35</sub>H<sub>28</sub>OP 495.1878, found 495.1877.

**(E)-(1,3-diphenylallyl)di(naphthalen-1-yl)phosphine oxide (3ac)**

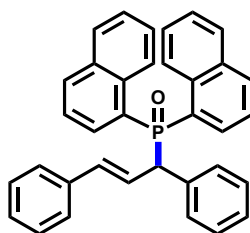

**3ac** was known compounds<sup>3, 5</sup>. Following the general procedure, the reaction was stirred at 100 °C (oil

bath) for 2h. **3ac** was isolated by PTLC (Petroleum ether (bp: 60-90 °C)/ethyl acetate = 1/1) as white solid (44 mg, 44% yield), Mp: 235-237 °C. <sup>1</sup>H NMR (400 MHz, Chloroform-*d*) δ 8.76 (d, *J* = 8.5 Hz, 1H), 8.58 (d, *J* = 8.4 Hz, 1H), 8.13 (dd, *J* = 14.3, 7.1 Hz, 1H), 7.94 (d, *J* = 8.1 Hz, 1H), 7.90 – 7.78 (m, 2H), 7.78 (d, *J* = 8.1 Hz, 1H), 7.72 (d, *J* = 8.1 Hz, 1H), 7.46 (td, *J* = 7.7, 2.6 Hz, 1H), 7.42 – 7.22 (m, 7H), 7.22 – 7.01 (m, 8H), 6.78 (dt, *J* = 15.9, 8.8 Hz, 1H), 6.38 (dd, *J* = 15.9, 3.3 Hz, 1H), 4.79 (t, *J* = 9.0 Hz, 1H). <sup>13</sup>C NMR (101 MHz, Chloroform-*d*) δ 136.9 (d, *J*<sub>C-P</sub> = 5.5 Hz), 136.8, 134.4, 134.3, 134.2, 134.0 (d, *J*<sub>C-P</sub> = 5.0 Hz), 133.9, 133.7, 133.6, 133.1 (d, *J*<sub>C-P</sub> = 2.4 Hz), 132.9 (d, *J*<sub>C-P</sub> = 2.2 Hz), 132.2, 132.1, 130.0 (d, *J*<sub>C-P</sub> = 22.8 Hz), 129.7, 129.7, 129.1 (d, *J*<sub>C-P</sub> = 23.3 Hz), 128.9, 128.7, 128.5, 128.4, 127.6, 127.3, 127.1, 126.7 (d, *J*<sub>C-P</sub> = 4.5 Hz), 126.5, 126.3, 126.2, 125.8 (d, *J*<sub>C-P</sub> = 6.5 Hz), 124.4 (d, *J*<sub>C-P</sub> = 13.7 Hz), 124.2 (d, *J*<sub>C-P</sub> = 13.7 Hz), 52.1 (d, *J*<sub>C-P</sub> = 66.7 Hz). <sup>31</sup>P NMR (162 MHz, Chloroform-*d*) δ = 36.77. IR (KBr): 3056.69, 1594.63, 1505.53, 1492.54, 1452.35, 1264.41, 1211.45, 1177.12, 1159.10, 1026.67, 986.49, 830.40, 800.29, 773.78, 747.24, 697.58 cm<sup>-1</sup>. HRMS (ESI/[M+H]<sup>+</sup>) Calcd. for: C<sub>35</sub>H<sub>28</sub>OP 495.1878, found 495.1880.

### 6-((E)-1,3-diphenylallyl)dibenzo[*c,e*][1,2]oxaphosphinine 6-oxide (**3ad**)

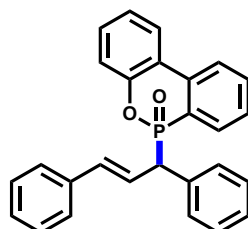

**3ad** was known compounds<sup>3</sup>. Following the general procedure, the reaction was stirred at 100 °C (oil bath) for 12h. **3ad** was isolated by PTLC (Petroleum ether (bp: 60-90 °C)/ethyl acetate = 1/1) as white solid (45 mg, 55% yield), Mp: 165-168 °C. Then the two isomer can be further separated by carefully PTLC(Petroleum ether (bp: 60-90 °C)/ethyl acetate = 2:1) for five times, one of the pure isomer was obtained in 6 mg and the NMR was checked and set as reference to assign picks of this two isomer. <sup>1</sup>H NMR (400 MHz, Chloroform-*d*) δ 7.96 – 7.89 (m, 2H), 7.81 – 7.74 (m, 1H), 7.69 (t, *J* = 7.8 Hz, 1H), 7.44 – 7.37 (m, 1H), 7.36 – 7.27 (m, 6H), 7.27 – 7.20 (m, 4H), 7.18 (d, *J* = 7.0 Hz, 2H), 6.98 (dt, *J* = 8.2, 1.9 Hz, 1H), 6.52 – 6.40 (m, 1H), 6.21 (dd, *J* = 15.7, 4.8 Hz, 1H), 4.01 (dd, *J* = 16.1, 9.7 Hz, 1H). <sup>13</sup>C NMR (101 MHz, Chloroform-*d*) δ 149.9 (d, *J*<sub>C-P</sub> = 8.2 Hz), 136.5 (d, *J*<sub>C-P</sub> = 3.3 Hz), 136.2 (d, *J*<sub>C-P</sub> = 7.0 Hz), 135.3, 135.2, 134.3 (d, *J*<sub>C-P</sub> = 8.6 Hz), 133.6 (d, *J*<sub>C-P</sub> = 2.3 Hz), 132.5, 132.4, 130.8, 129.2, 129.1, 128.8 (d, *J*<sub>C-P</sub> = 2.4 Hz), 128.5 (d, *J*<sub>C-P</sub> = 0.9 Hz), 128.1 (d, *J*<sub>C-P</sub> = 12.3 Hz), 127.9 (d, *J*<sub>C-P</sub> = 1.0 Hz), 127.6 (d, *J*<sub>C-P</sub> = 2.9 Hz), 126.5 (d, *J*<sub>C-P</sub> = 1.9 Hz), 125.2, 124.6, 123.9, 123.7 (d, *J*<sub>C-P</sub> = 10.0 Hz), 122.7 (d, *J*<sub>C-P</sub> = 13.7 Hz), 122.5 (d, *J*<sub>C-P</sub> = 7.3 Hz), 120.7 (d, *J*<sub>C-P</sub> = 6.6 Hz), 51.7 (d, *J*<sub>C-P</sub> = 86.9 Hz). <sup>31</sup>P NMR (162 MHz, Chloroform-*d*) δ = 33.53. Another diastereoisomer: <sup>1</sup>H NMR (400 MHz, Chloroform-*d*) δ 7.92 – 7.83 (m, 2H), 7.59 (t, *J* = 7.8 Hz, 1H), 7.42-7.33 (m, 2H), 7.32 – 7.27 (m, 4H), 7.26 – 7.16 (m, 9H), 6.57 (ddd, *J* = 15.9, 9.0, 7.0 Hz, 1H), 6.57-6.38 (m, 1H), 4.01 (dd, *J* = 16.1, 9.7 Hz, 1H). <sup>13</sup>C NMR (101 MHz, Chloroform-*d*) δ 149.9 (d, *J*<sub>C-P</sub> = 7.9 Hz), 136.6 (d, *J*<sub>C-P</sub> = 17.5 Hz), 136.2 (d, *J*<sub>C-P</sub> = 6.8 Hz), 134.7 (d, *J*<sub>C-P</sub> = 12.2 Hz), 134.2 (d, *J*<sub>C-P</sub> = 5.4 Hz), 133.6 (d, *J*<sub>C-P</sub> = 11.5 Hz), 131.7 (d, *J*<sub>C-P</sub> = 8.6 Hz), 130.8, 129.3 (d, *J*<sub>C-P</sub> = 6.3 Hz), 128.8, 128.8, 128.6 (d, *J*<sub>C-P</sub> = 5.2 Hz), 128.1 (d, *J*<sub>C-P</sub> = 12.4 Hz), 128.0, 127.7, 126.5 (d, *J*<sub>C-P</sub> = 12.8 Hz), 125.4, 124.7, 124.1, 123.8 (d, *J*<sub>C-P</sub> = 10.0 Hz), 122.9, 122.8, 122.7 (d, *J*<sub>C-P</sub> = 2.0 Hz), 120.7 (d, *J*<sub>C-P</sub> = 6.6 Hz), 51.8 (d, *J*<sub>C-P</sub> = 86.8 Hz). <sup>31</sup>P NMR (162 MHz, Chloroform-*d*) δ = 34.18. IR (KBr): 3060.19, 3026.41, 2924.92, 1594.74, 1581.87, 1493.73, 1475.21, 1447.53, 1430.59, 1275.52, 1256.69, 1236.47, 1116.99, 912.82, 749.72, 697.48 cm<sup>-1</sup>. HRMS (ESI/[M+H]<sup>+</sup>) Calcd. for: C<sub>27</sub>H<sub>22</sub>O<sub>2</sub>P 409.1357, found 409.1355.

### dimethyl (E)-(1,3-diphenylallyl)phosphonate (**3ae**)

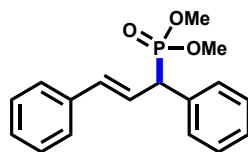

**3ae** was known compounds<sup>5</sup>. Following the general procedure, the reaction was stirred at 60 °C (oil bath) for 12h. **3ae** was isolated by PTLC (Petroleum ether (bp: 60-90 °C)/ethyl acetate = 1/1) as yellow liquid (34 mg, 56% yield) (94% yield, in case 4.0 equiv. dimethyl phosphonate was introduced). <sup>1</sup>H NMR (400 MHz, Chloroform-*d*)  $\delta$  7.48 – 7.43 (m, 2H), 7.40 – 7.33 (m, 4H), 7.30 (t,  $J$  = 7.4 Hz, 3H), 7.22 (t,  $J$  = 7.2 Hz, 1H), 6.64 – 6.47 (m, 2H), 4.03 (dd,  $J$  = 24.9, 7.9 Hz, 1H), 3.73 (d,  $J$  = 10.8 Hz, 3H), 3.55 (d,  $J$  = 10.5 Hz, 3H). <sup>13</sup>C NMR (101 MHz, Chloroform-*d*)  $\delta$  136.7 (d,  $J_{C-P}$  = 2.9 Hz), 135.7 (d,  $J_{C-P}$  = 7.4 Hz), 134.0, 133.9, 129.1, 129.0, 128.9 (d,  $J_{C-P}$  = 1.6 Hz), 128.6, 127.9, 127.5 (d,  $J_{C-P}$  = 2.9 Hz), 126.6, 124.3 (d,  $J_{C-P}$  = 9.7 Hz), 53.7, 53.6, 49.1 (d,  $J_{C-P}$  = 137.5 Hz). <sup>31</sup>P NMR (162 MHz, Chloroform-*d*)  $\delta$  = 27.74. IR (KBr): 3026.51, 2951.96, 2849.82, 1598.71, 1494.14, 1453.33, 1274.96, 1258.33, 1182.57, 1028.37, 966.21, 824.73, 764.40, 749.19, 698.20 cm<sup>-1</sup>. HRMS (ESI/[M+H]<sup>+</sup>) Calcd. for: C<sub>17</sub>H<sub>20</sub>O<sub>3</sub>P 303.1150, found 303.1148.

### diethyl (E)-(1,3-diphenylallyl)phosphonate (**3af**)

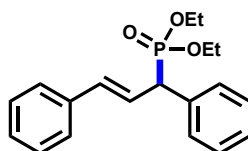

**3af** was known compounds<sup>5</sup>. Following the general procedure, the reaction was stirred at 100 °C (oil bath) for 12h. **3af** was isolated by PTLC (Petroleum ether (bp: 60-90 °C)/ethyl acetate = 1/1) as yellow liquid (37 mg, 56% yield) (86% yield, in case 4.0 equiv. diethyl phosphonate was introduced). <sup>1</sup>H NMR (400 MHz, Chloroform-*d*)  $\delta$  7.48 – 7.43 (m, 2H), 7.35 (q,  $J$  = 7.6 Hz, 4H), 7.31 – 7.23 (m, 3H), 7.21 (t,  $J$  = 7.3 Hz, 1H), 6.61 – 6.48 (m, 2H), 4.08 (pd,  $J$  = 7.0, 1.5 Hz, 2H), 4.04 – 3.90 (m, 2H), 3.86 – 3.74 (m, 1H), 1.25 (t,  $J$  = 7.1 Hz, 3H), 1.12 (t,  $J$  = 7.1 Hz, 3H). <sup>13</sup>C NMR (101 MHz, Chloroform-*d*)  $\delta$  136.8 (d,  $J_{C-P}$  = 2.9 Hz), 136.1 (d,  $J_{C-P}$  = 7.0 Hz), 133.8, 133.7, 129.2, 129.1, 128.8, 128.6, 127.8, 127.4 (d,  $J_{C-P}$  = 2.9 Hz), 126.5, 124.7 (d,  $J_{C-P}$  = 9.6 Hz), 62.9 (d,  $J_{C-P}$  = 7.1 Hz), 62.7 (d,  $J_{C-P}$  = 7.5 Hz), 49.5 (d,  $J_{C-P}$  = 136.9 Hz), 16.6 (d,  $J_{C-P}$  = 5.8 Hz), 16.4 (d,  $J_{C-P}$  = 5.7 Hz). <sup>31</sup>P NMR (162 MHz, Chloroform-*d*)  $\delta$  = 25.44. IR (KBr): 3059.36, 3027.22, 2980.70, 2929.15, 2905.49, 1598.64, 1494.34, 1452.85, 1390.39, 1247.58, 1163.17, 1051.42, 1025.90, 963.45, 794.98, 747.34, 697.74 cm<sup>-1</sup>. HRMS (ESI/[M+H]<sup>+</sup>) Calcd. for: C<sub>19</sub>H<sub>24</sub>O<sub>3</sub>P 331.1463, found 331.1457.

### diethyl (E)-(1,3-di-*o*-tolylallyl)phosphonate (**3ag**)

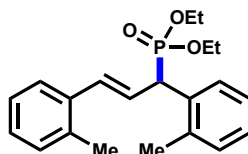

Following the general procedure, the reaction was stirred at 100 °C (oil bath) for 12h. **3ag** was isolated by PTLC (Petroleum ether (bp: 60-90 °C)/ethyl acetate = 1/1) as yellow liquid (61 mg, 85% yield). <sup>1</sup>H NMR (400 MHz, Chloroform-*d*)  $\delta$  7.68 (d,  $J$  = 7.7 Hz, 1H), 7.47 – 7.41 (m, 1H), 7.24 – 7.08 (m, 6H), 6.79 (dd,  $J$  = 15.6, 4.8 Hz, 1H), 6.36 (dt,  $J$  = 15.6, 8.5 Hz, 1H), 4.30 (dd,  $J$  = 25.6, 8.7 Hz, 1H), 4.11 (p,  $J$  = 7.1 Hz, 2H), 3.95 (dp,  $J$  = 10.1, 7.1 Hz, 1H), 3.84 – 3.72 (m, 1H), 2.42 (s, 3H), 2.30 (s, 3H), 1.29 (t,  $J$  = 7.1 Hz, 3H), 1.10 (t,  $J$  = 7.1 Hz, 3H). <sup>13</sup>C NMR (101 MHz, Chloroform-*d*)  $\delta$  136.3 (d,  $J_{C-P}$  = 8.9

Hz), 136.1 (d,  $J_{C-P}$  = 2.8 Hz), 135.4 (d,  $J_{C-P}$  = 1.3 Hz), 134.4 (d,  $J_{C-P}$  = 6.7 Hz), 131.7 (d,  $J_{C-P}$  = 13.6 Hz), 130.7, 130.3, 128.9 (d,  $J_{C-P}$  = 5.0 Hz), 127.7, 127.2 (d,  $J_{C-P}$  = 3.0 Hz), 126.4 (d,  $J_{C-P}$  = 2.8 Hz), 126.3 (d,  $J_{C-P}$  = 9.7 Hz), 126.2, 125.9 (d,  $J_{C-P}$  = 1.4 Hz), 62.9 (d,  $J_{C-P}$  = 6.9 Hz), 62.6 (d,  $J_{C-P}$  = 7.4 Hz), 45.0 (d,  $J_{C-P}$  = 137.9 Hz), 20.1, 19.9, 16.6 (d,  $J_{C-P}$  = 6.0 Hz), 16.4 (d,  $J_{C-P}$  = 5.8 Hz).  $^{31}\text{P}$  NMR (162 MHz, Chloroform-*d*)  $\delta$  = 26.27. IR (KBr): 3019.79, 2979.71, 2928.74, 1490.59, 1461.36, 1390.20, 1248.76, 1163.36, 1097.05, 1050.88, 1025.85, 963.49, 751.68  $\text{cm}^{-1}$ . HRMS (ESI/[M+H] $^{+}$ ) Calcd. for:  $\text{C}_{21}\text{H}_{28}\text{O}_3\text{P}$  359.1776, found 359.1770.

**diethyl (E)-(1,3-bis(4-bromophenyl)allyl)phosphonate (3ah)**

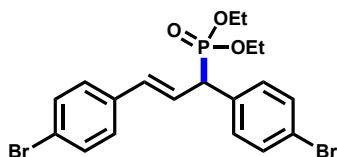

Following the general procedure, the reaction was stirred at 100 °C (oil bath) for 12h. **3ah** was isolated by PTLC (Petroleum ether (bp: 60-90 °C)/ethyl acetate = 1/1) as yellow liquid (70 mg, 72% yield).  $^1\text{H}$  NMR (400 MHz, Chloroform-*d*)  $\delta$  7.48 (d,  $J$  = 8.3 Hz, 2H), 7.42 (d,  $J$  = 8.5 Hz, 2H), 7.32 (dd,  $J$  = 8.5, 2.1 Hz, 2H), 7.22 (d,  $J$  = 8.4 Hz, 2H), 6.53 – 6.38 (m, 2H), 4.14 – 4.03 (m, 2H), 4.03 – 3.88 (m, 2H), 3.87 – 3.79 (m, 1H), 1.26 (t,  $J$  = 7.0 Hz, 3H), 1.15 (t,  $J$  = 7.0 Hz, 3H).  $^{13}\text{C}$  NMR (101 MHz, Chloroform-*d*)  $\delta$  135.5 (d,  $J_{C-P}$  = 2.8 Hz), 134.9, 134.9, 133.0, 132.9, 131.9, 131.8, 130.8, 130.8, 128.0, 125.0, 124.9, 121.7, 121.5 (d,  $J_{C-P}$  = 3.8 Hz), 63.0 (d,  $J_{C-P}$  = 7.5 Hz), 62.9 (d,  $J_{C-P}$  = 7.6 Hz), 48.8 (d,  $J_{C-P}$  = 137.9 Hz), 16.6 (d,  $J_{C-P}$  = 5.7 Hz), 16.4 (d,  $J_{C-P}$  = 5.7 Hz).  $^{31}\text{P}$  NMR (162 MHz, Chloroform-*d*)  $\delta$  = 24.44. IR (KBr): 3027.76, 2980.16, 2928.69, 2905.17, 1486.28, 1391.21, 1246.63, 1163.14, 1071.31, 1050.27, 1024.57, 964.54, 795.54, 746.17  $\text{cm}^{-1}$ . HRMS (ESI/[M+H] $^{+}$ ) Calcd. for:  $\text{C}_{19}\text{H}_{22}\text{Br}_2\text{O}_3\text{P}$  486.9673, found 486.9670.

**diethyl (E)-(1,3-bis(4-fluorophenyl)allyl)phosphonate (3ai)**

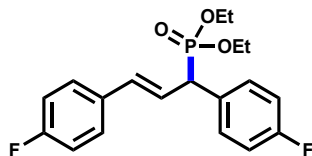

Following the general procedure, the reaction was stirred at 100 °C (oil bath) for 14h. **3ai** was isolated by PTLC (Petroleum ether (bp: 60-90 °C)/ethyl acetate = 1/1) as yellow liquid (48 mg, 65% yield).  $^1\text{H}$  NMR (400 MHz, Chloroform-*d*)  $\delta$  7.42 (ddd,  $J$  = 7.7, 5.2, 2.2 Hz, 2H), 7.34 (dd,  $J$  = 8.6, 5.5 Hz, 2H), 7.02 (dt,  $J$  = 24.2, 8.6 Hz, 4H), 6.52 (dd,  $J$  = 15.8, 4.1 Hz, 1H), 6.40 (dt,  $J$  = 15.9, 8.2 Hz, 1H), 4.15 – 4.03 (m, 2H), 4.02 – 3.90 (m, 2H), 3.89 – 3.78 (m, 1H), 1.27 (t,  $J$  = 7.1 Hz, 3H), 1.14 (t,  $J$  = 7.1 Hz, 3H).  $^{13}\text{C}$  NMR (101 MHz, Chloroform-*d*)  $\delta$  163.5 (d,  $J_{C-F}$  = 34.8 Hz), 161.1 (d,  $J_{C-F}$  = 32.1 Hz), 132.8, 132.7 (d,  $J_{C-P}$  = 14.1 Hz), 131.7 (dd,  $J_{C-F}$ ,  $J_{C-P}$  = 7.3, 3.0 Hz), 130.7, 130.7 (d,  $J_{C-P}$  = 14.14 Hz), 128.1, 128.0, 124.2 (d,  $J_{C-P}$  = 9.7 Hz), 115.8, 115.7, 115.6, 115.5, 62.9 (d,  $J_{C-P}$  = 7.0 Hz), 62.8 (d,  $J_{C-P}$  = 7.2 Hz), 48.5 (d,  $J_{C-P}$  = 138.5 Hz), 16.5 (d,  $J_{C-P}$  = 5.8 Hz), 16.4 (d,  $J_{C-P}$  = 5.8 Hz).  $^{31}\text{P}$  NMR (162 MHz, Chloroform-*d*)  $\delta$  = 25.07.  $^{19}\text{F}$  NMR (376 MHz, Chloroform-*d*)  $\delta$  -113.96, -115.02. IR (KBr): 2982.77, 2930.15, 1601.01, 1508.56, 1227.81, 1159.10, 1097.06, 1051.31, 1025.95, 965.14, 845.81, 787.30, 748.45  $\text{cm}^{-1}$ . HRMS (ESI/[M+H] $^{+}$ ) Calcd. for:  $\text{C}_{19}\text{H}_{22}\text{F}_2\text{O}_3\text{P}$  367.1275, found 367.1273.

**diethyl (E)-(1,3-bis(4-methoxyphenyl)allyl)phosphonate (3aj)**



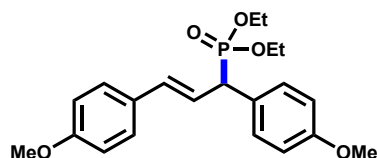

Following the general procedure, the reaction was stirred at 100 °C (oil bath) for 12h. **3aj** was isolated by PTLC (Petroleum ether (bp: 60-90 °C)/ethyl acetate = 1/1) as yellow liquid (41 mg, 53% yield). <sup>1</sup>H NMR (400 MHz, Chloroform-*d*) δ 7.39 – 7.34 (m, 2H), 7.31 (d, *J* = 8.7 Hz, 2H), 6.89 (d, *J* = 8.5 Hz, 2H), 6.86 – 6.80 (m, 2H), 6.49 (dd, *J* = 15.8, 4.2 Hz, 1H), 6.40 – 6.31 (m, 1H), 4.14 – 4.03 (m, 2H), 4.02 – 3.85 (m, 2H), 3.85 – 3.80 (m, 1H), 3.79 (s, 3H), 3.79 (s, 3H), 1.26 (t, *J* = 7.1 Hz, 3H), 1.14 (t, *J* = 7.1 Hz, 3H). <sup>13</sup>C NMR (101 MHz, Chloroform-*d*) δ 159.3, 158.8 (d, *J*<sub>C-P</sub> = 2.8 Hz), 133.0, 132.9, 130.2, 130.1, 129.7 (d, *J*<sub>C-P</sub> = 2.7 Hz), 128.1, 128.1, 127.7, 122.6, 122.5, 114.2, 114.0, 62.8 (d, *J*<sub>C-P</sub> = 7.1 Hz), 62.7 (d, *J*<sub>C-P</sub> = 7.7 Hz), 55.4, 48.5 (d, *J*<sub>C-P</sub> = 137.8 Hz), 16.6 (d, *J*<sub>C-P</sub> = 5.8 Hz), 16.4 (d, *J*<sub>C-P</sub> = 5.8 Hz). <sup>31</sup>P NMR (162 MHz, Chloroform-*d*) δ = 26.01. IR (KBr): 2979.40, 2931.54, 1607.38, 1510.42, 1463.19, 1290.93, 1249.30, 1175.64, 1627.83, 963.42, 829.84, 776.03, 746.48, 697.88 cm<sup>-1</sup>. HRMS (ESI/[M+H]<sup>+</sup>) Calcd. for: C<sub>21</sub>H<sub>28</sub>O<sub>5</sub>P 391.1674, found 391.1681.

#### diethyl (E)-(1,3-bis(3,5-dimethylphenyl)allyl)phosphonate (**3ak**)

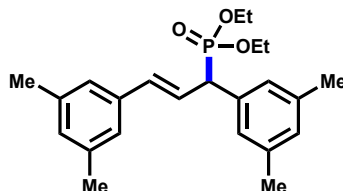

Following the general procedure, the reaction was stirred at 100 °C (oil bath) for 14h. **3ak** was isolated by PTLC (Petroleum ether (bp: 60-90 °C)/ethyl acetate = 1/1) as yellow liquid (15 mg, 20% yield). <sup>1</sup>H NMR (400 MHz, Chloroform-*d*) δ 7.05 (s, 2H), 7.00 (s, 2H), 6.89 (s, 1H), 6.87 (s, 1H), 6.54 – 6.42 (m, 2H), 4.14 – 4.03 (m, 2H), 4.03 – 3.85 (m, 2H), 3.85 – 3.76 (m, 1H), 2.31 (s, 6H), 2.29 (s, 6H), 1.27 (t, *J* = 7.1 Hz, 3H), 1.14 (t, *J* = 7.1 Hz, 3H). <sup>13</sup>C NMR (101 MHz, Chloroform-*d*) δ 138.2 (d, *J*<sub>C-P</sub> = 1.7 Hz), 138.0, 136.8 (d, *J*<sub>C-P</sub> = 2.2 Hz), 135.9 (d, *J*<sub>C-P</sub> = 7.2 Hz), 133.8, 133.6, 129.4, 129.0 (d, *J*<sub>C-P</sub> = 3.2 Hz), 126.9, 126.8, 124.5, 124.4, 62.8 (d, *J*<sub>C-P</sub> = 5.5 Hz), 62.7 (d, *J*<sub>C-P</sub> = 5.4 Hz), 49.5 (d, *J*<sub>C-P</sub> = 136.8 Hz), 21.4, 21.3, 16.6 (d, *J*<sub>C-P</sub> = 5.9 Hz), 16.4 (d, *J*<sub>C-P</sub> = 5.9 Hz). <sup>31</sup>P NMR (162 MHz, Chloroform-*d*) δ = 25.80. IR (KBr): 2980.17, 2919.13, 1600.83, 1508.29, 1454.71, 1390.52, 1247.22, 1160.68, 1052.91, 1026.04, 962.62, 786.89, 748.93, 698.60 cm<sup>-1</sup>. HRMS (ESI/[M+H]<sup>+</sup>) Calcd. for: C<sub>23</sub>H<sub>32</sub>O<sub>3</sub>P 387.2089, found 387.2081.

#### diphenyl(phenyl(3-phenyloxiran-2-yl)methyl)phosphine oxide (**4**)

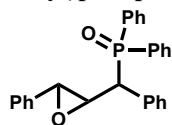

**4** was isolated by PTLC (Petroleum ether (bp: 60-90 °C)/ethyl acetate = 1/1) as white solid (47 mg, 57% yield), Mp: 149-151 °C. <sup>1</sup>H NMR (400 MHz, Chloroform-*d*) δ 7.96 – 7.84 (m, 2H), 7.63 – 7.51 (m, 5H), 7.46 (dd, *J* = 11.1, 8.3 Hz, 2H), 7.33 – 7.17 (m, 11H), 4.39 (t, *J* = 8.0 Hz, 1H), 4.23 (d, *J* = 8.0 Hz, 1H), 4.13 (d, *J* = 9.0 Hz, 1H). <sup>13</sup>C NMR (101 MHz, Chloroform-*d*) δ 141.6, 132.7 (d, *J*<sub>C-P</sub> = 3.9 Hz), 132.2 (d, *J*<sub>C-P</sub> = 2.8 Hz), 131.7 (d, *J*<sub>C-P</sub> = 4.7 Hz), 131.6, 131.3, 131.2, 130.9, 130.8, 129.1, 129.0, 128.4, 128.3, 128.3 (d, *J*<sub>C-P</sub> = 1.4 Hz), 128.1 (d, *J*<sub>C-P</sub> = 4.2 Hz), 127.3 (d, *J*<sub>C-P</sub> = 1.9 Hz), 127.0, 74.4 (d, *J*<sub>C-P</sub> = 10.9 Hz), 74.3 (d, *J*<sub>C-P</sub> = 3.3 Hz), 46.1 (d, *J*<sub>C-P</sub> = 68.9 Hz). <sup>31</sup>P NMR (162 MHz, Chloroform-*d*) δ = 39.00. IR (KBr): 3059.55, 3029.90, 2915.81, 1708.78, 1493.89, 1437.61, 1275.42, 1260.96, 1154.22, 1117.66,



750.44, 698.80  $\text{cm}^{-1}$ . HRMS (ESI/[M+H]<sup>+</sup>) Calcd. for: C<sub>27</sub>H<sub>24</sub>O<sub>2</sub>P 411.1514, found 411.1515.

**(E)-(1,3-diphenylallyl)diphenylphosphane (5)**

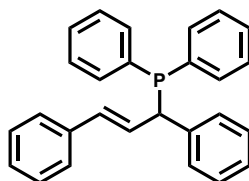

**5** was white solid (59 mg, 78% yield). <sup>1</sup>H NMR (400 MHz, Chloroform-*d*)  $\delta$  7.62 – 7.49 (m, 3H), 7.29 – 7.10 (m, 17H), 6.38 (dq,  $J$  = 11.5, 5.9, 4.3 Hz, 1H), 6.20 (dd,  $J$  = 15.7, 3.3 Hz, 1H), 4.31 (dd,  $J$  = 8.6, 5.6 Hz, 1H). <sup>13</sup>C NMR (101 MHz, Chloroform-*d*)  $\delta$  136.8 (d,  $J_{C-P}$  = 2.5 Hz), 136.0 (d,  $J_{C-P}$  = 6.1 Hz), 134.5 (d,  $J_{C-P}$  = 11.2 Hz), 131.9 (d,  $J_{C-P}$  = 2.5 Hz), 131.8, 131.8, 131.7 (d,  $J_{C-P}$  = 128.7 Hz), 131.6 (d,  $J_{C-P}$  = 2.9 Hz), 131.5, 131.4, 129.6, 129.5, 128.7, 128.6, 128.6, 128.5, 128.5, 128.3, 128.2, 127.7 (d,  $J_{C-P}$  = 0.8 Hz), 127.2 (d,  $J_{C-P}$  = 2.4 Hz), 126.5, 126.5, 124.7 (d,  $J_{C-P}$  = 7.3 Hz), 52.4 (d,  $J_{C-P}$  = 65.0 Hz). <sup>31</sup>P NMR (162 MHz, Chloroform-*d*)  $\delta$  = -0.84. IR (KBr): 3056.55, 3025.25, 2922.63, 1493.54, 1437.38, 1275.39, 1260.69, 1172.96, 1117.25, 764.20, 749.42, 721.55, 698.48  $\text{cm}^{-1}$ . HRMS (ESI/[M+H]<sup>+</sup>) Calcd. for: C<sub>27</sub>H<sub>24</sub>P 379.1616, found 379.1610.

**(E)-(1,3-bis(4-(dibenzo[b,d]furan-4-yl)phenyl)allyl)diphenylphosphine oxide (6)**

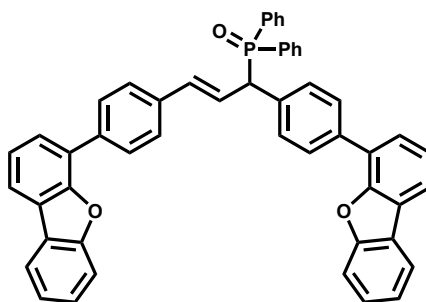

**6** was isolated by PTLC (Petroleum ether (bp: 60-90 °C)/ethyl acetate = 1/1) as white solid (140 mg, 96% yield), Mp: 228-230 °C. <sup>1</sup>H NMR (400 MHz, Chloroform-*d*)  $\delta$  7.98 (dd,  $J$  = 7.7, 0.7 Hz, 2H), 7.94 – 7.89 (m, 4H), 7.84 (dd,  $J$  = 8.1, 1.4 Hz, 4H), 7.72 – 7.65 (m, 2H), 7.62 – 7.50 (m, 10H), 7.49 – 7.33 (m, 12H), 6.76 (ddd,  $J$  = 16.2, 9.2, 7.2 Hz, 1H), 6.49 (dd,  $J$  = 15.7, 3.7 Hz, 1H), 4.53 (t,  $J$  = 9.6 Hz, 1H). <sup>13</sup>C NMR (101 MHz, Chloroform-*d*)  $\delta$  156.2, 153.4 (d,  $J_{C-P}$  = 1.5 Hz), 136.2 (d,  $J_{C-P}$  = 2.5 Hz), 135.8, 135.4 (d,  $J_{C-P}$  = 6.3 Hz), 135.3 (d,  $J_{C-P}$  = 2.6 Hz), 134.3 (d,  $J_{C-P}$  = 11.3 Hz), 131.9 (d,  $J_{C-P}$  = 8.5 Hz), 131.6 (d,  $J_{C-P}$  = 141.7 Hz), 131.5 (d,  $J_{C-P}$  = 8.7 Hz), 129.8 (d,  $J_{C-P}$  = 5.7 Hz), 129.0 (d,  $J_{C-P}$  = 1.7 Hz), 128.9, 128.7, 128.6, 128.5, 128.4, 127.3 (d,  $J_{C-P}$  = 1.4 Hz), 126.8 (d,  $J_{C-P}$  = 1.4 Hz), 126.7 (d,  $J_{C-P}$  = 8.7 Hz), 125.4 (d,  $J_{C-P}$  = 5.3 Hz), 125.0, 124.2, 123.3 (d,  $J_{C-P}$  = 3.4 Hz), 122.9 (d,  $J_{C-P}$  = 2.5 Hz), 120.8, 119.8 (d,  $J_{C-P}$  = 2.4 Hz), 112.0, 52.4 (d,  $J_{C-P}$  = 65.0 Hz). <sup>31</sup>P NMR (162 MHz, Chloroform-*d*)  $\delta$  = 32.15. IR (KBr): 3054.19, 2923.67, 1512.06, 1450.72, 1438.23, 1396.11, 1275.20, 1259.77, 1190.23, 1173.12, 1117.21, 1099.51, 1028.15, 969.93, 749.77, 701.21  $\text{cm}^{-1}$ . HRMS (ESI/[M+H]<sup>+</sup>) Calcd. for: C<sub>51</sub>H<sub>36</sub>O<sub>3</sub>P 727.2402, found 727.2393.

## 5. References

- (1) X-D. Li, L.-J. Xie, D.-L. Kong, L. Liu, and L Cheng. *Tetrahedron*, 2016, **72**, 1873-1880.
- (2) C. C. Chen and J. Waser, *Chem. Commun.*, 2014, **50**, 12923-12926.

- (3) X.-Y. Wo, P.-Z. Xie, W.-S. Fu, C.-Q. Gao, Y.- N. Liu, Z.-L. Sun and T.-P. Loh, *Chem. Commun.*, 2018, **54**, 11132-11135.
- (4) L. Zhang, W. Liu, X.-M. Zhao, *Eur. J. Org. Chem.*, **2014**, 6846–6849.
- (5) Q. Chen, C.-X. Wen, X.-F. Wang, G.-D. Yu, C. OuYang, Y.-P. Huo and K. Zhang, *Adv. Synth. Catal.*, 2018, **360**, 3590-3594.
- (6) P. Butti, R. Rochat, A. D. Sadow and A. Tongi, *Angew. Chem. Int. Ed.*, 2008, **47**, 4878-4881.

## 6. NMR spectra for new compounds

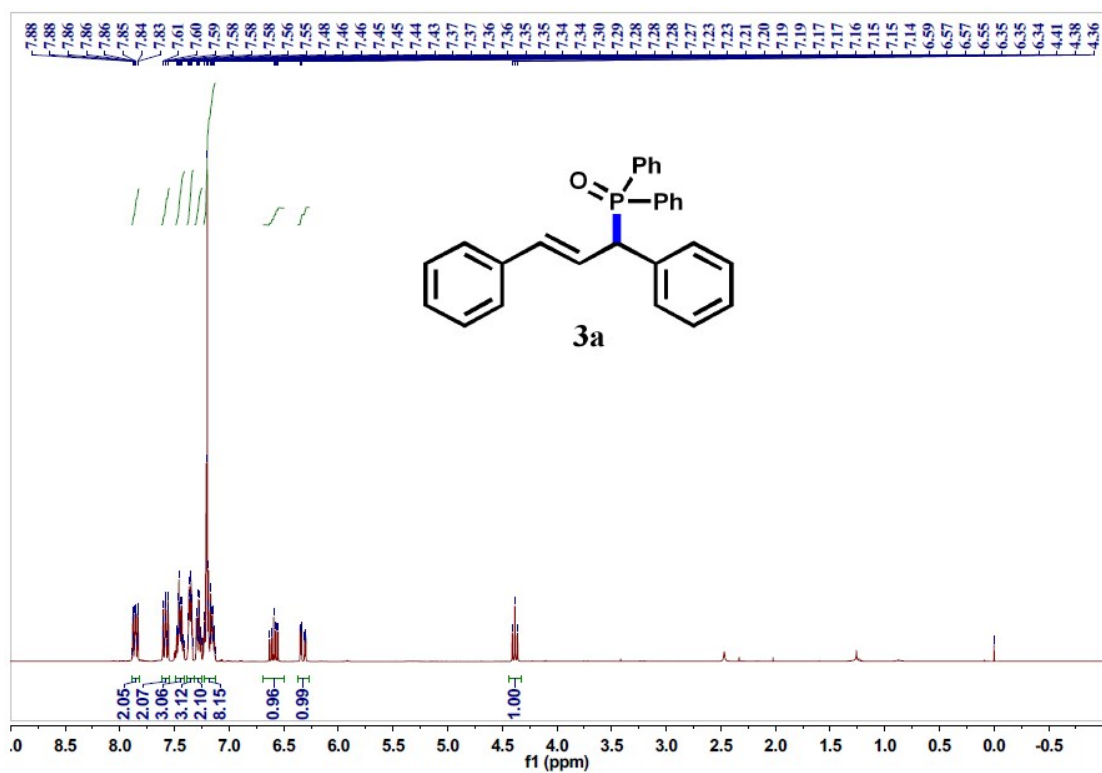

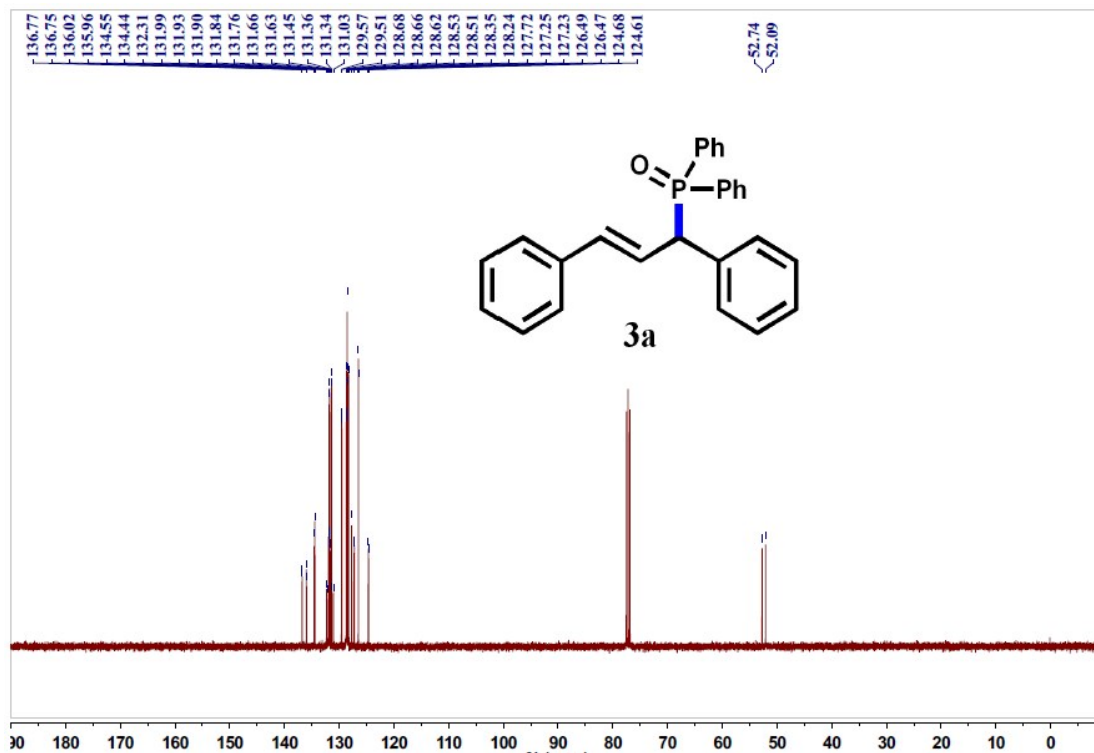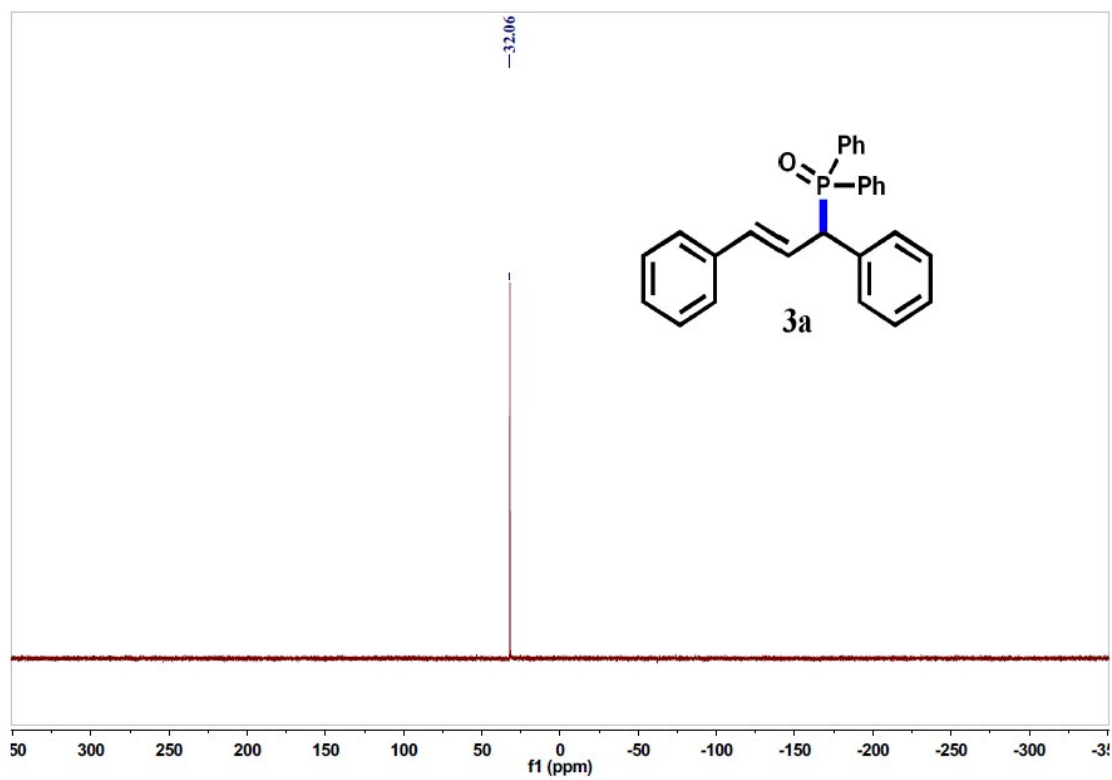

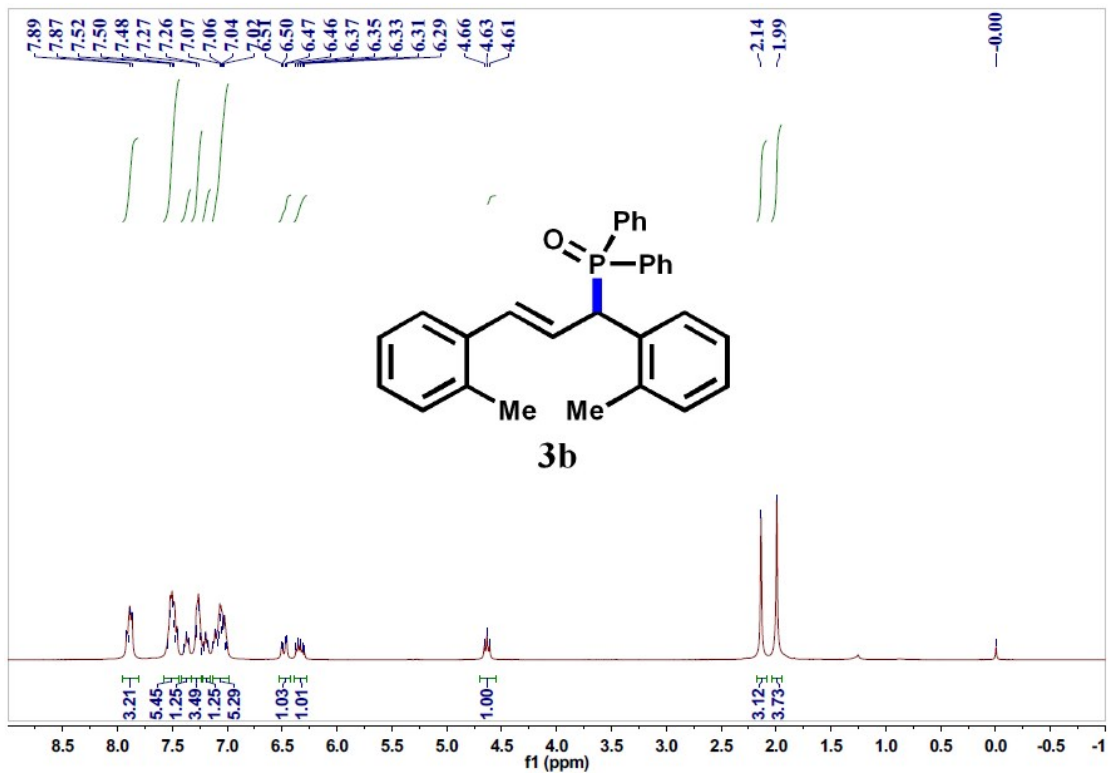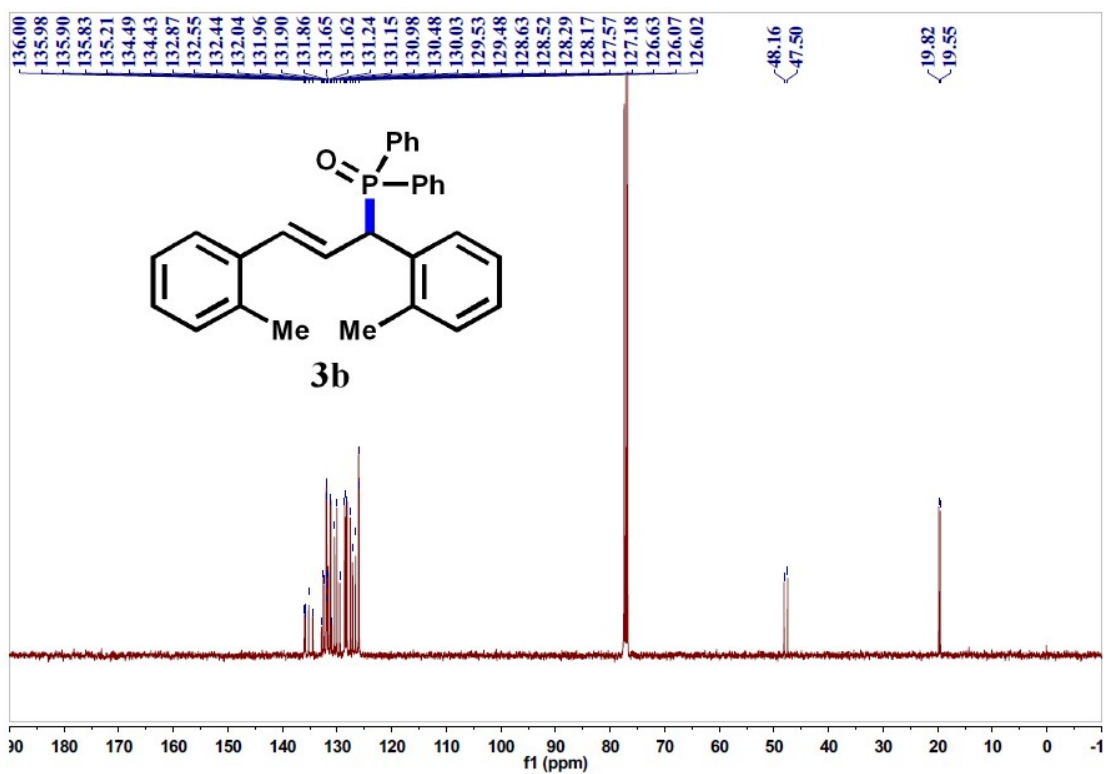

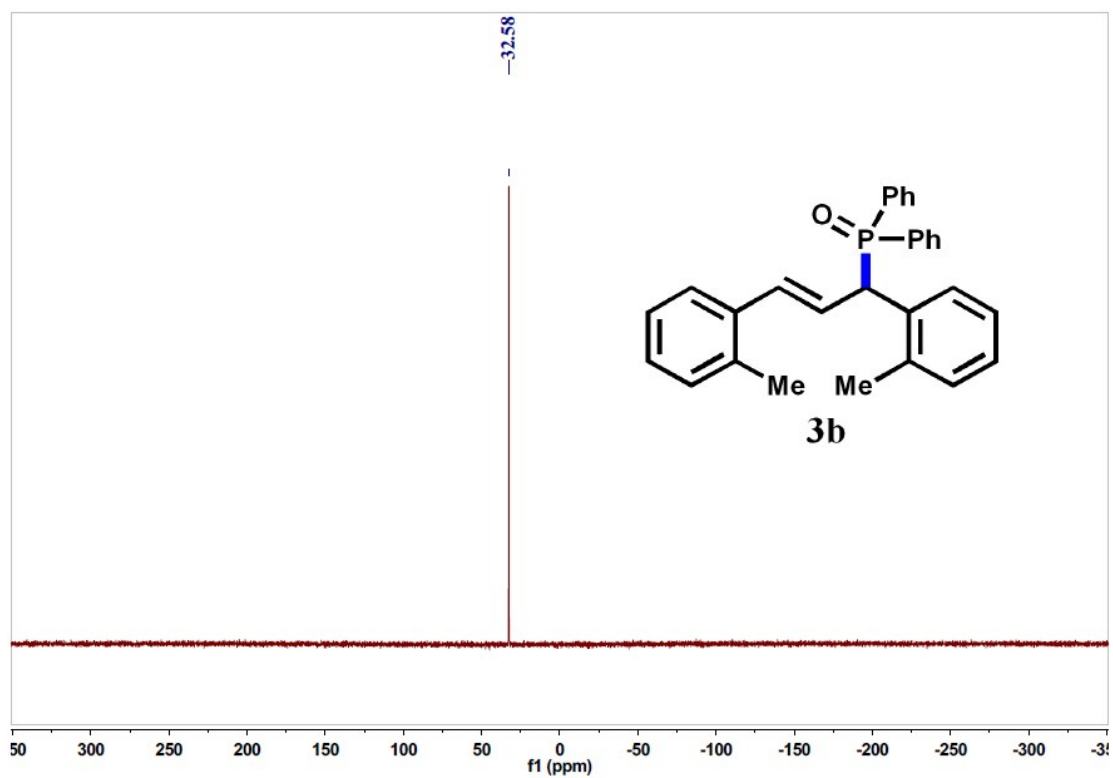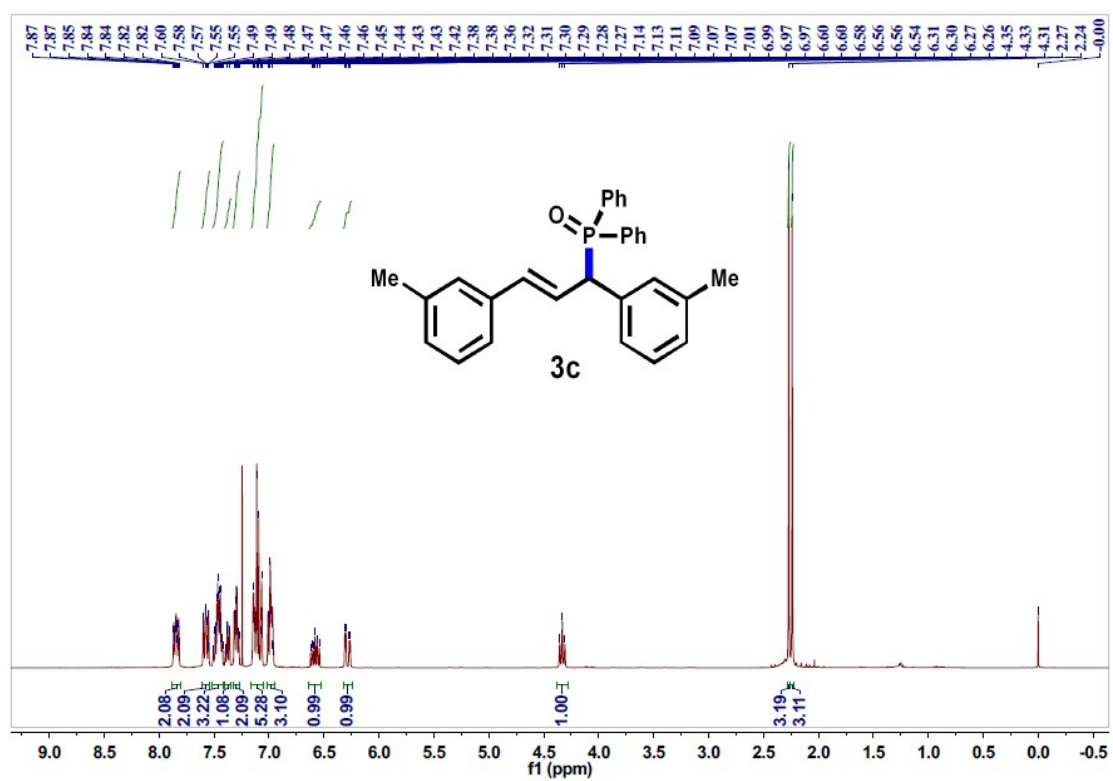

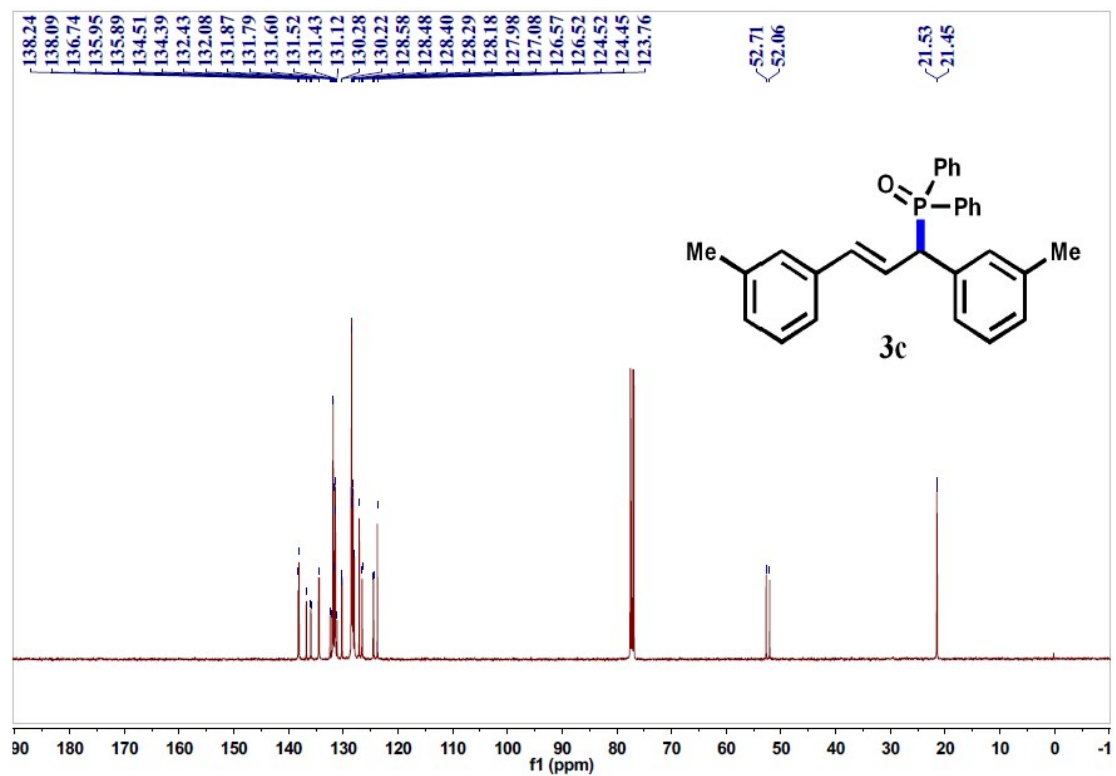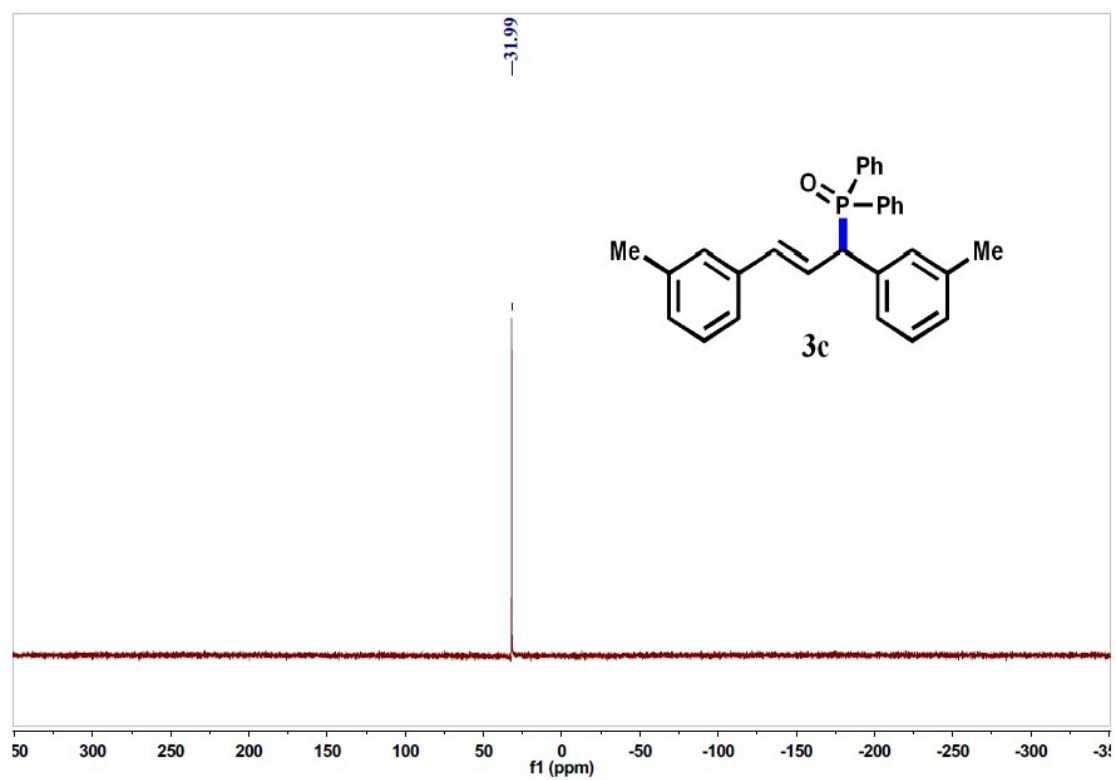

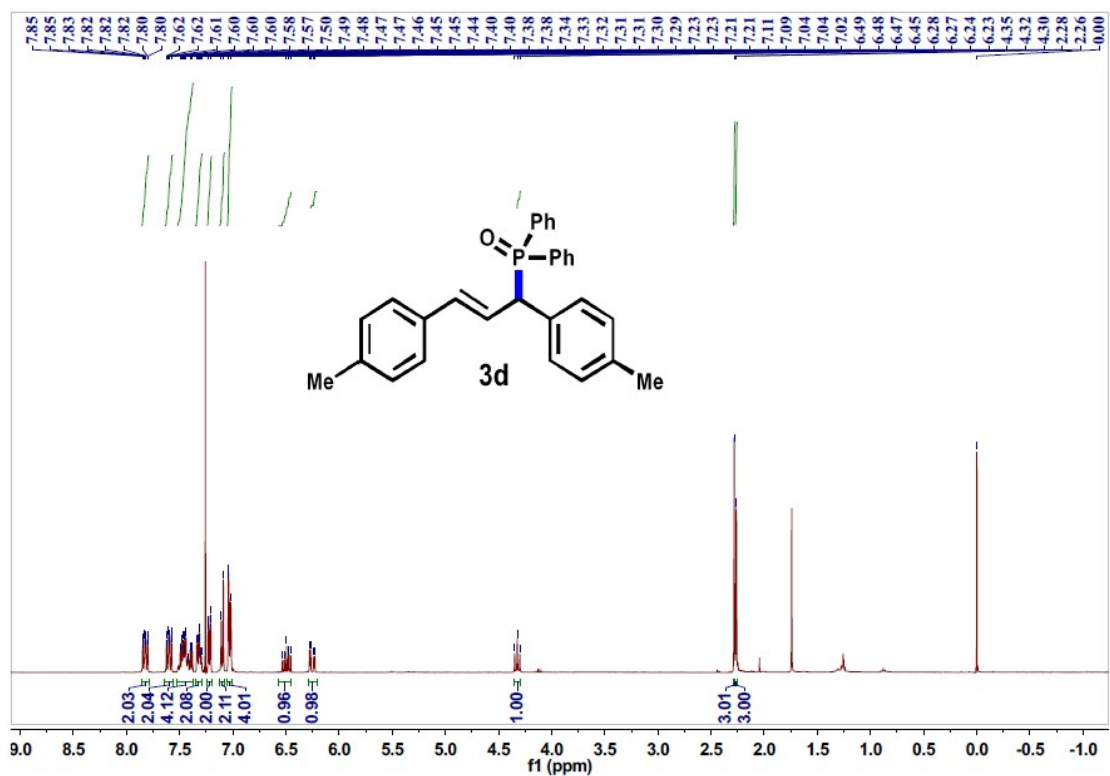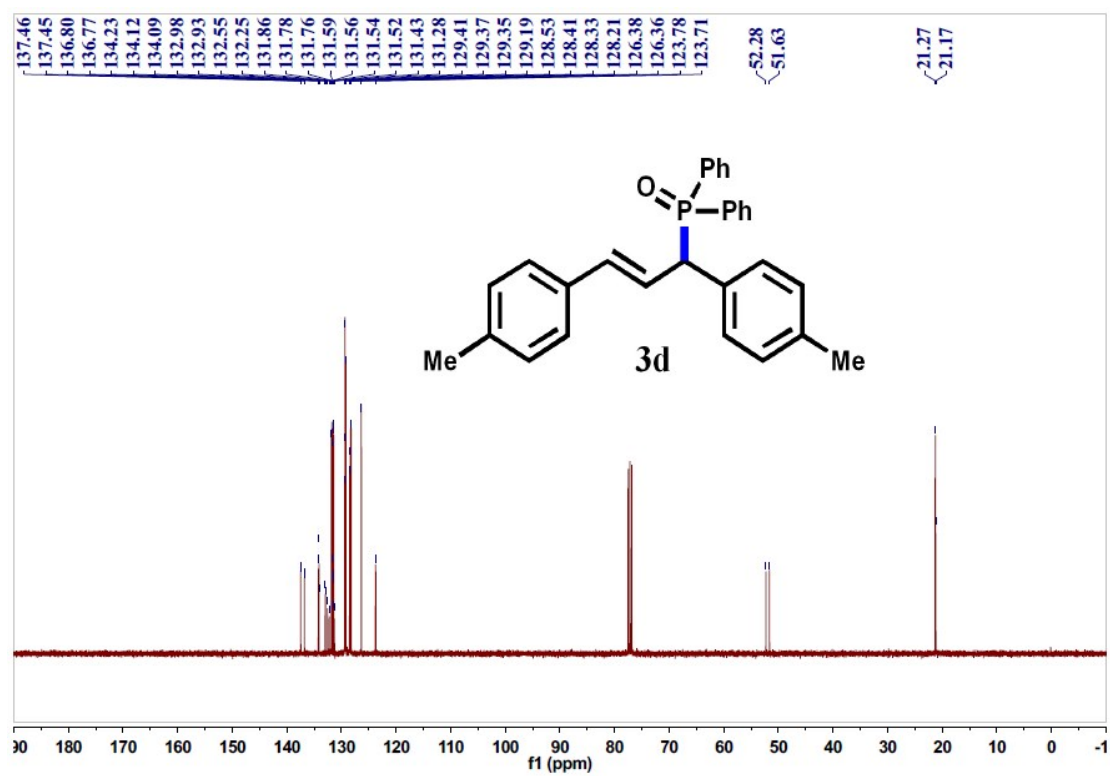

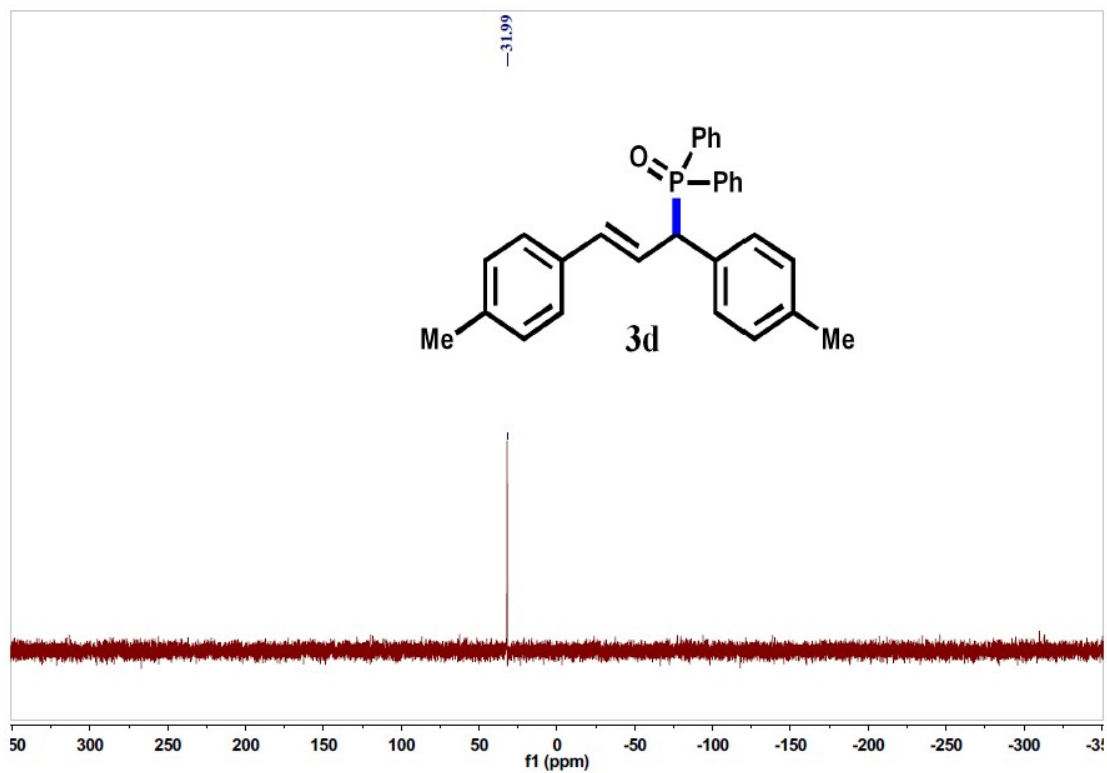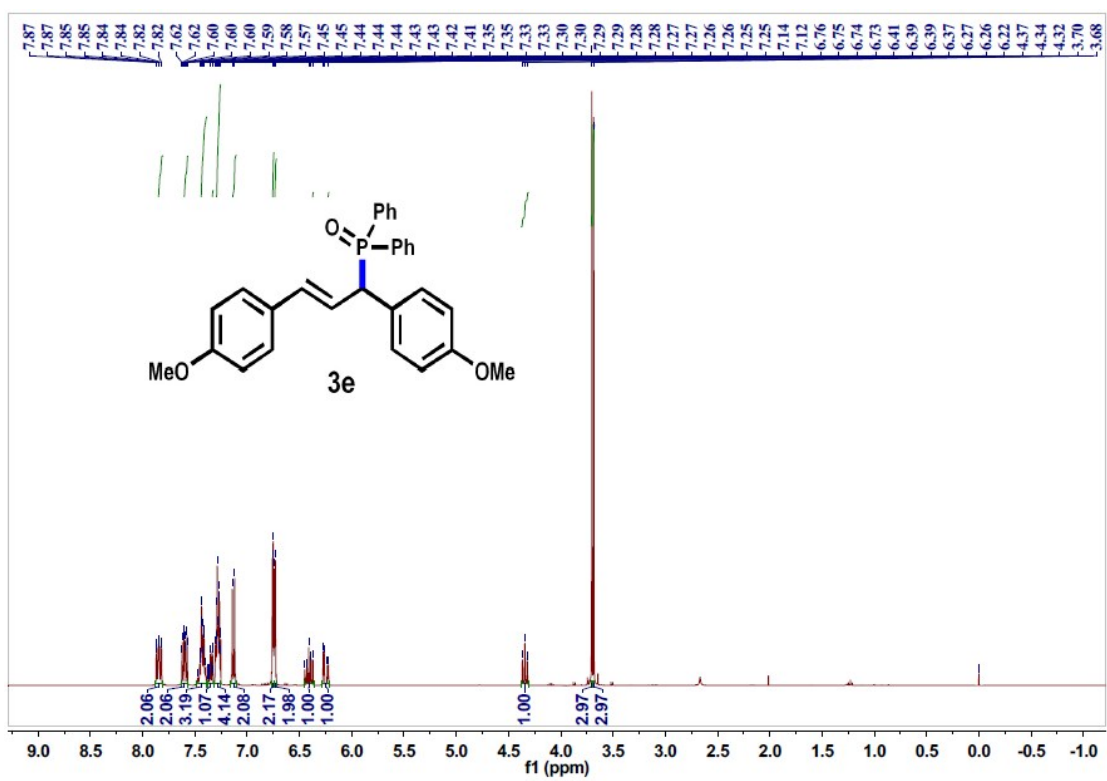



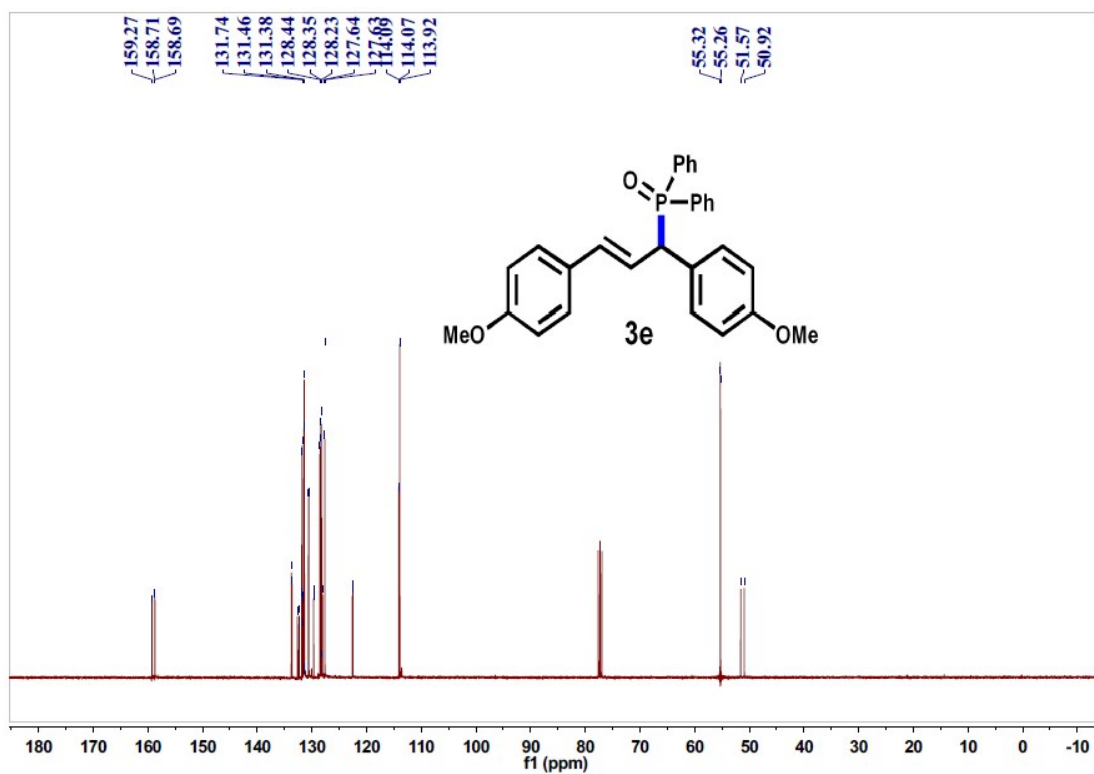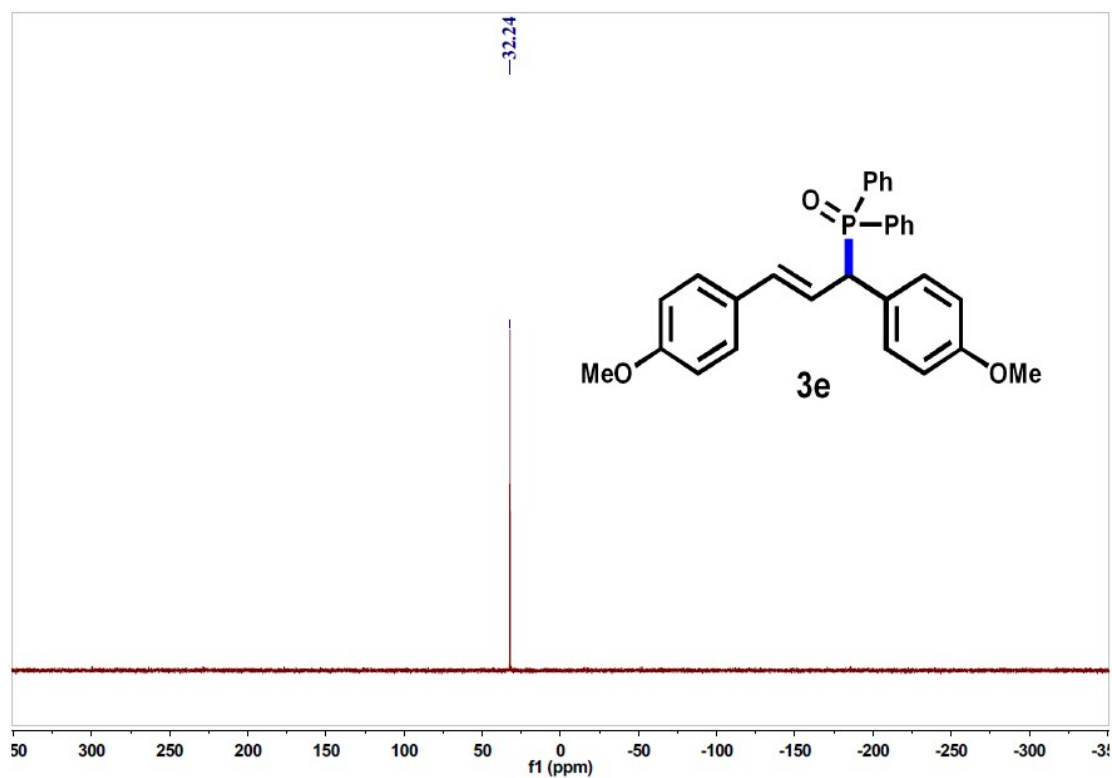

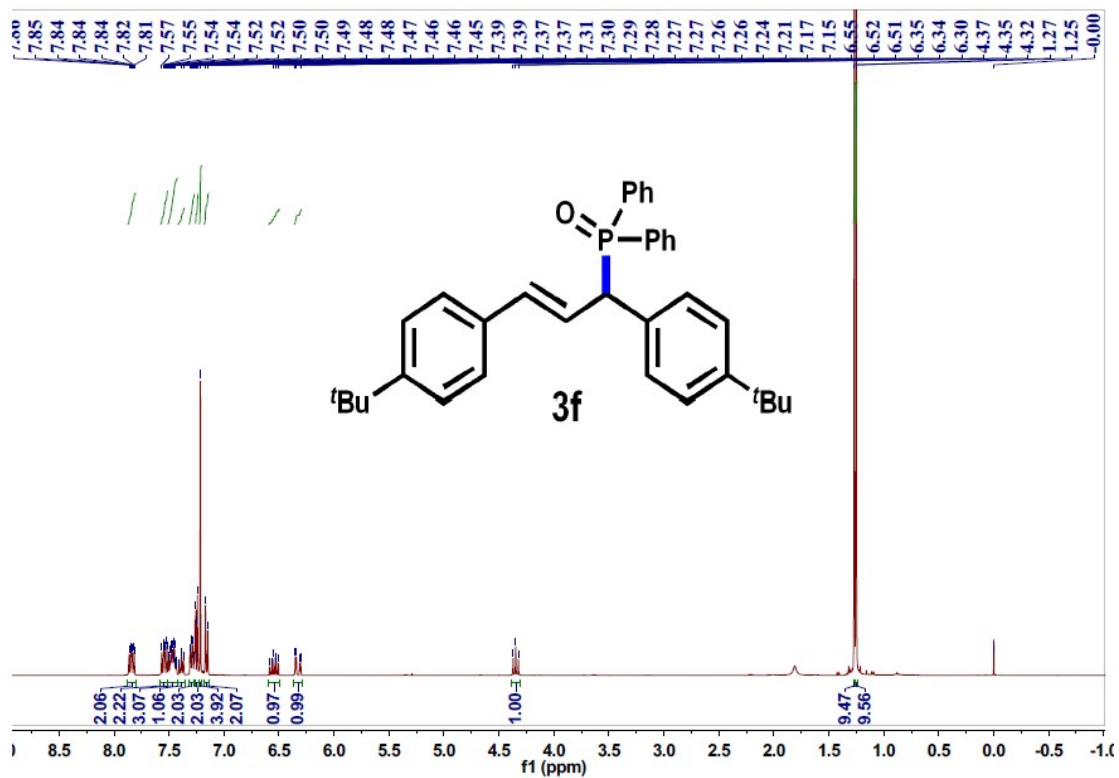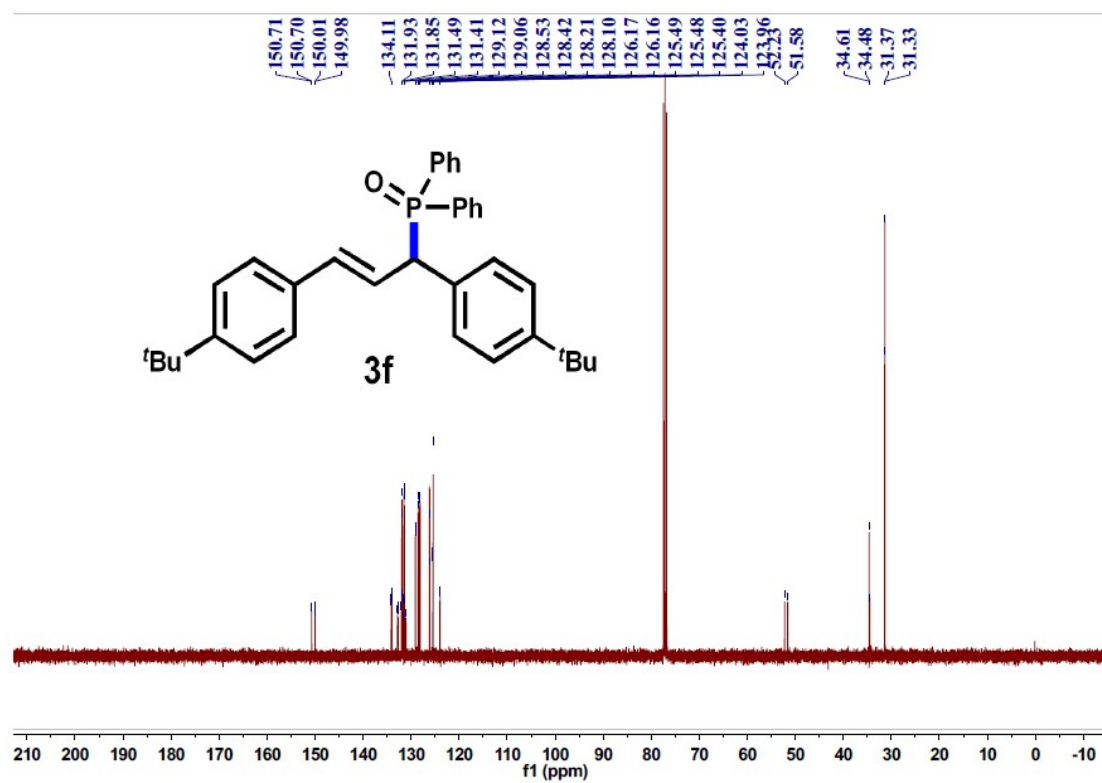

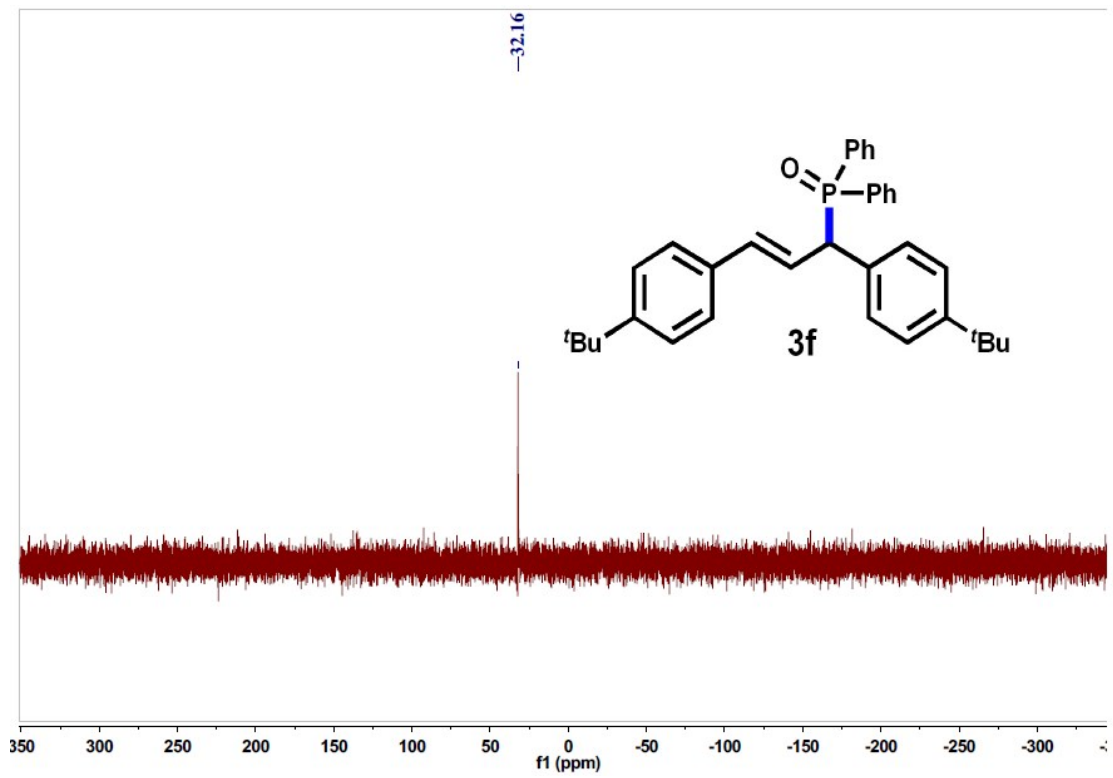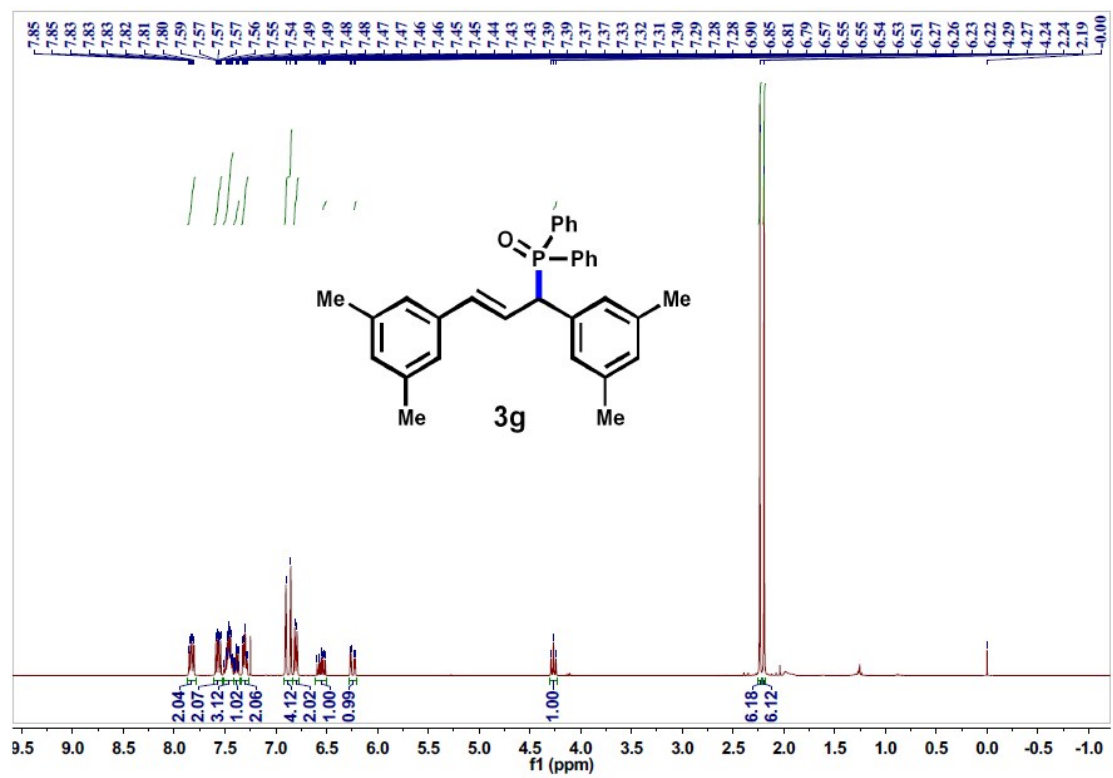

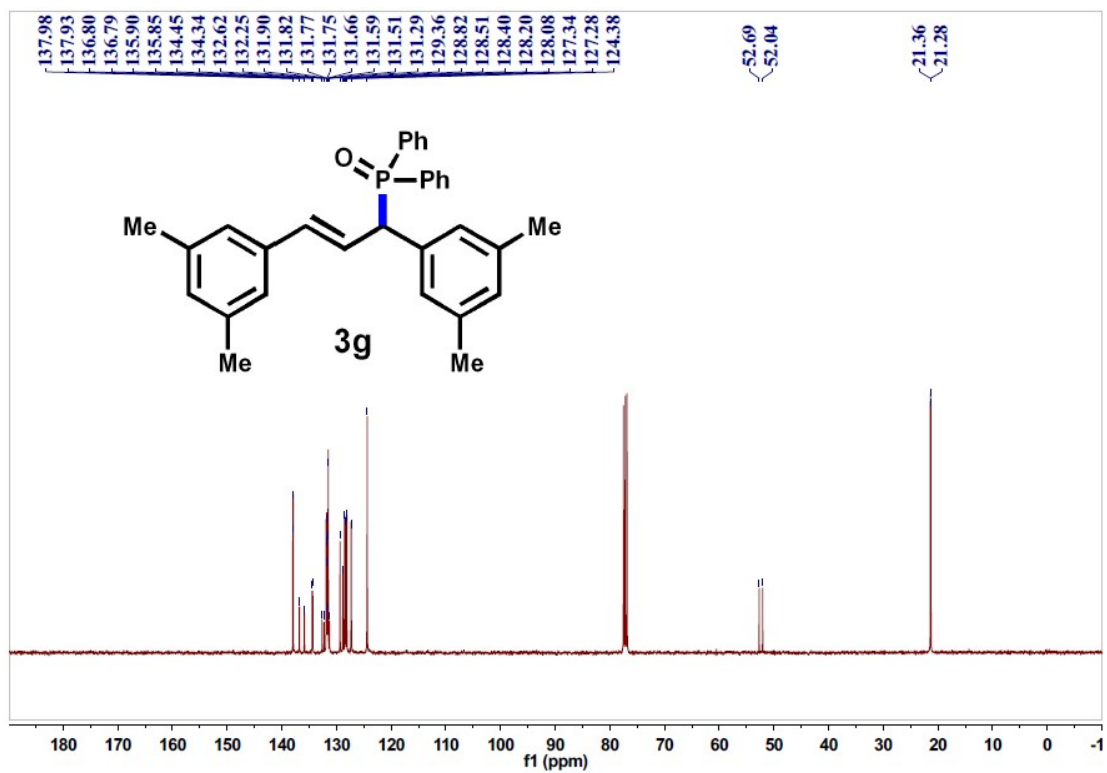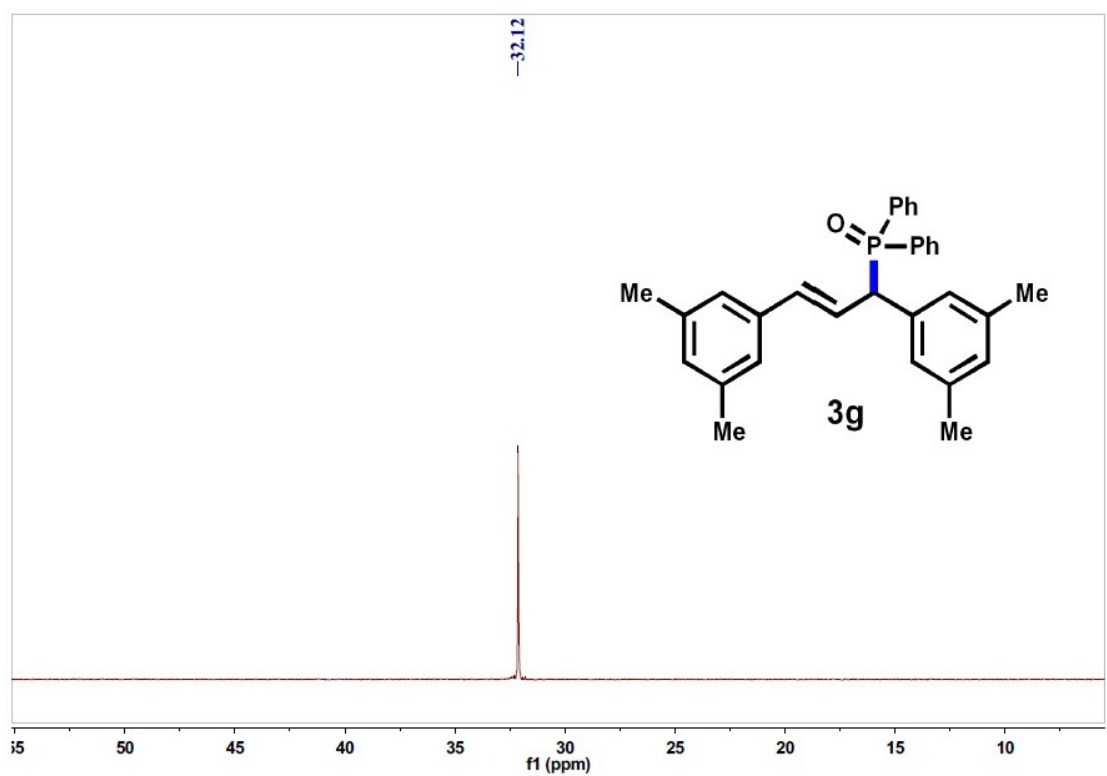

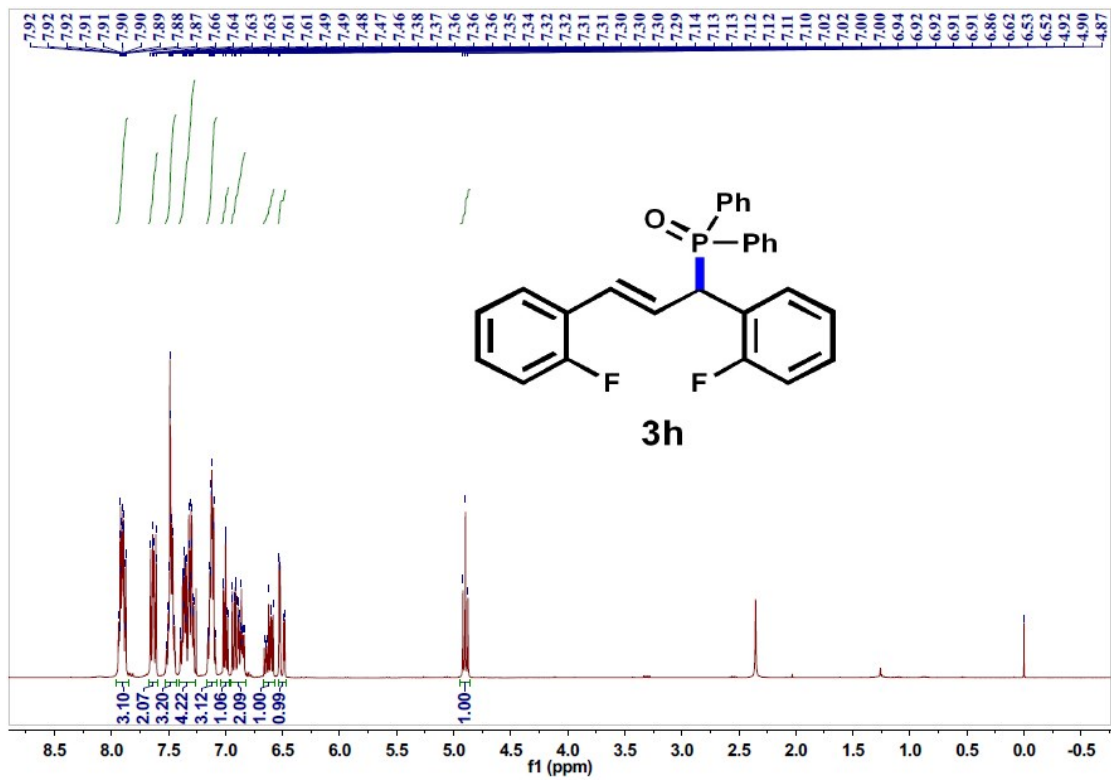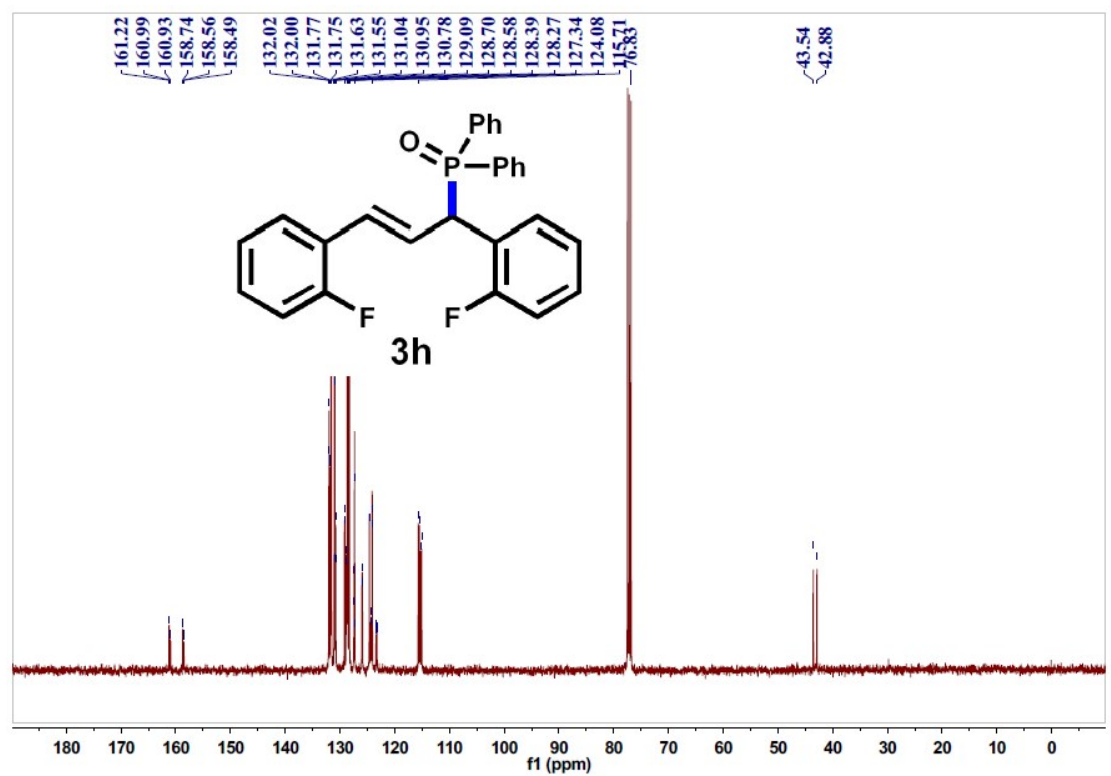

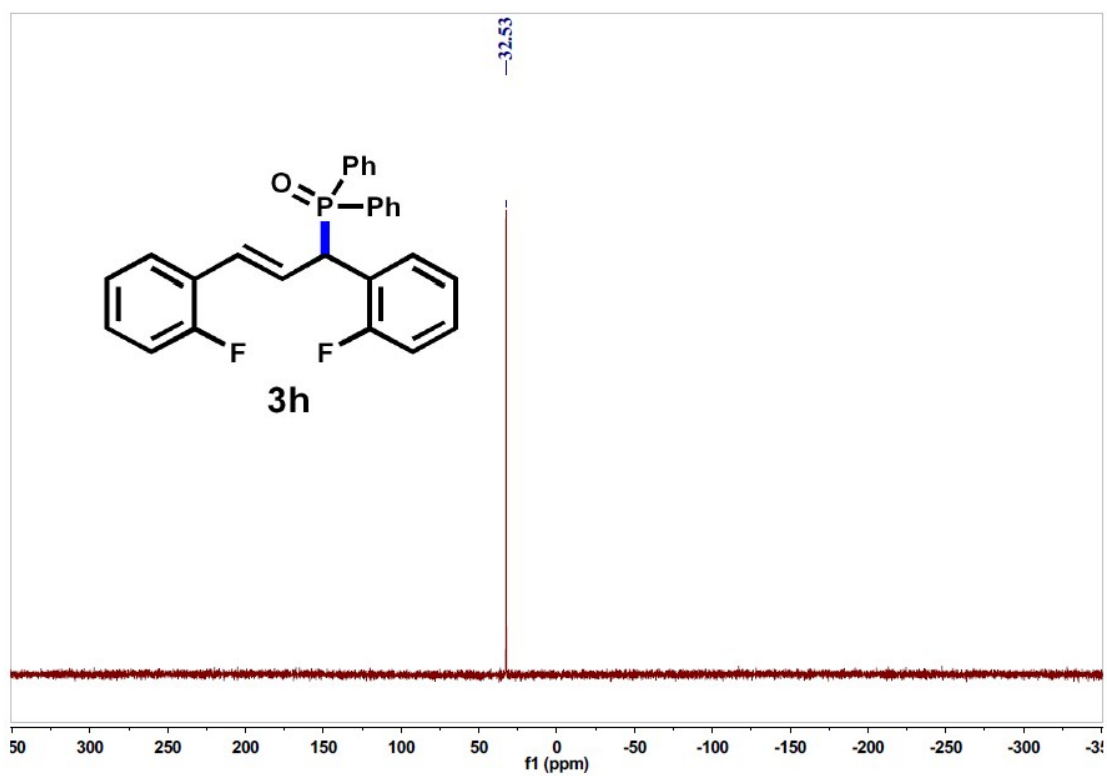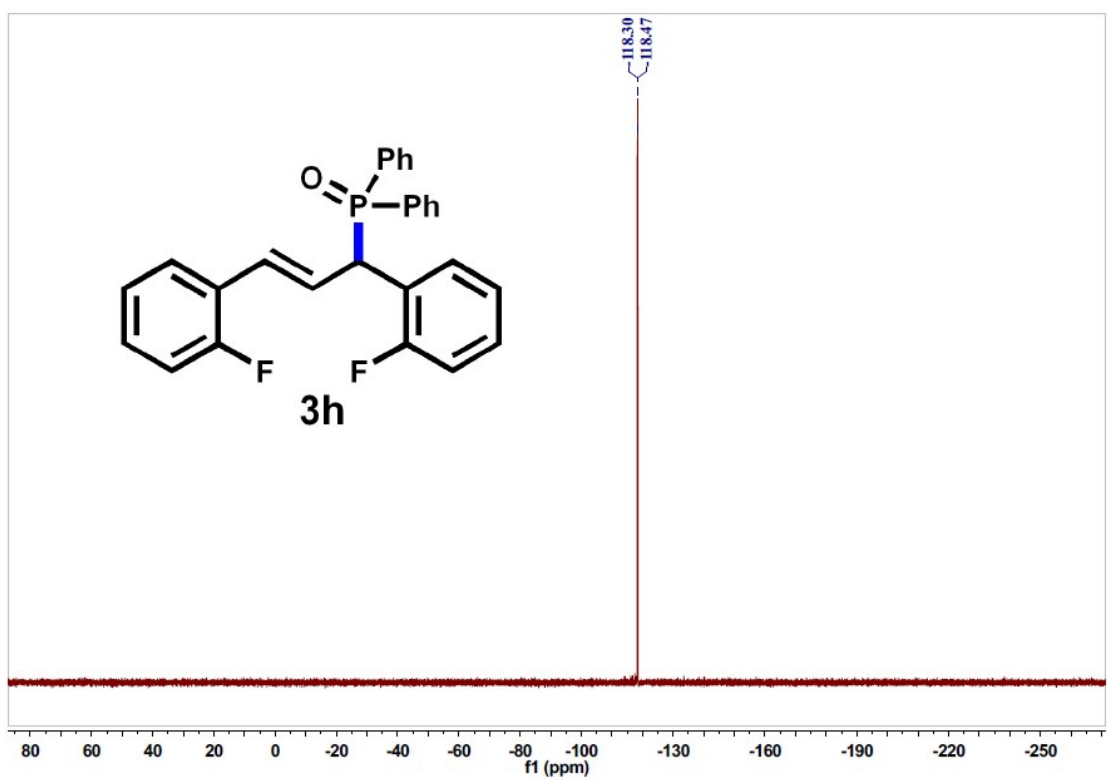

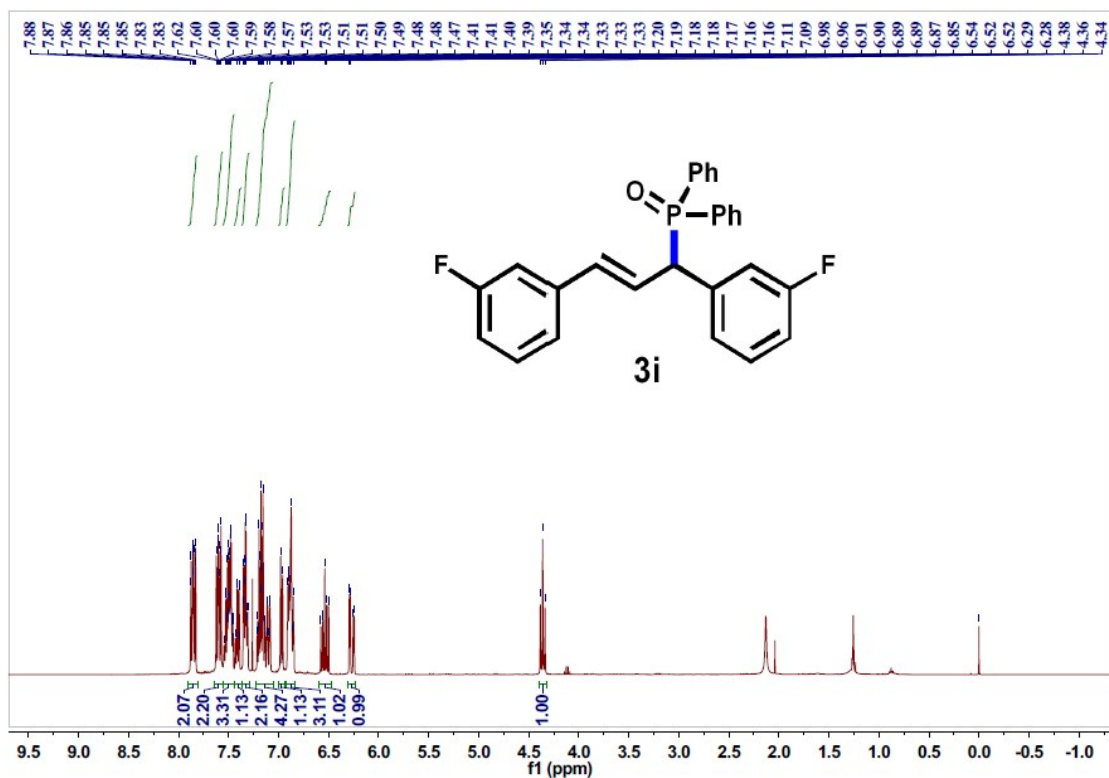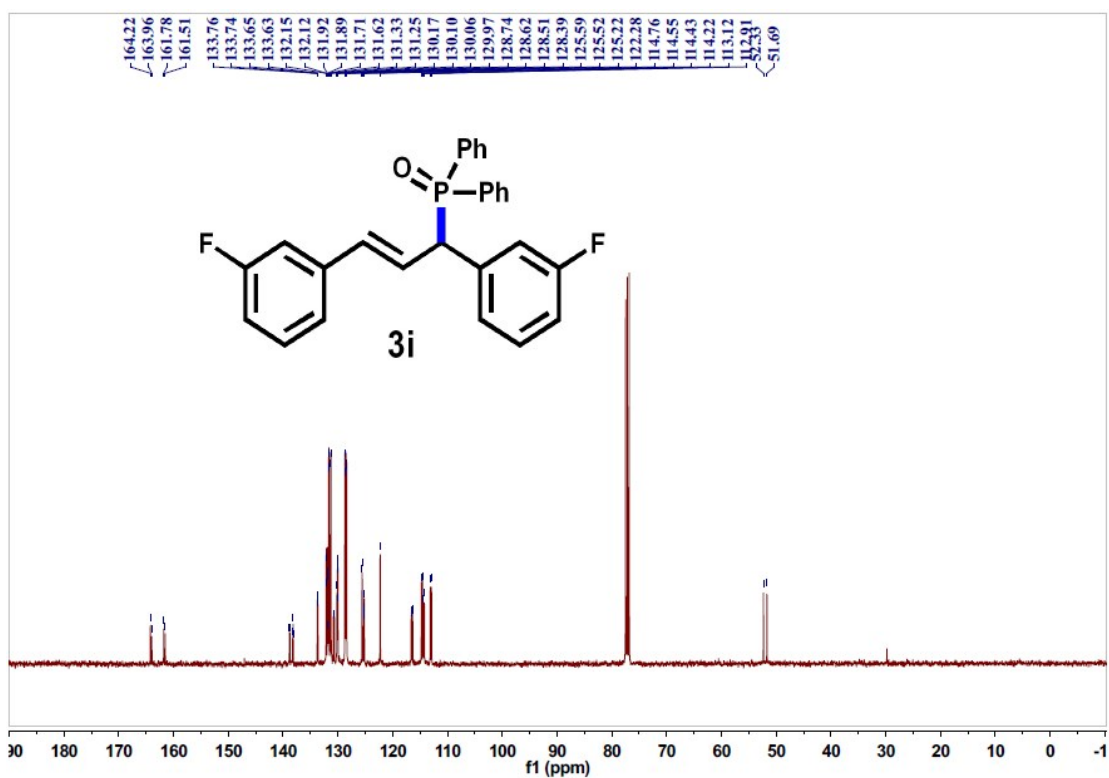

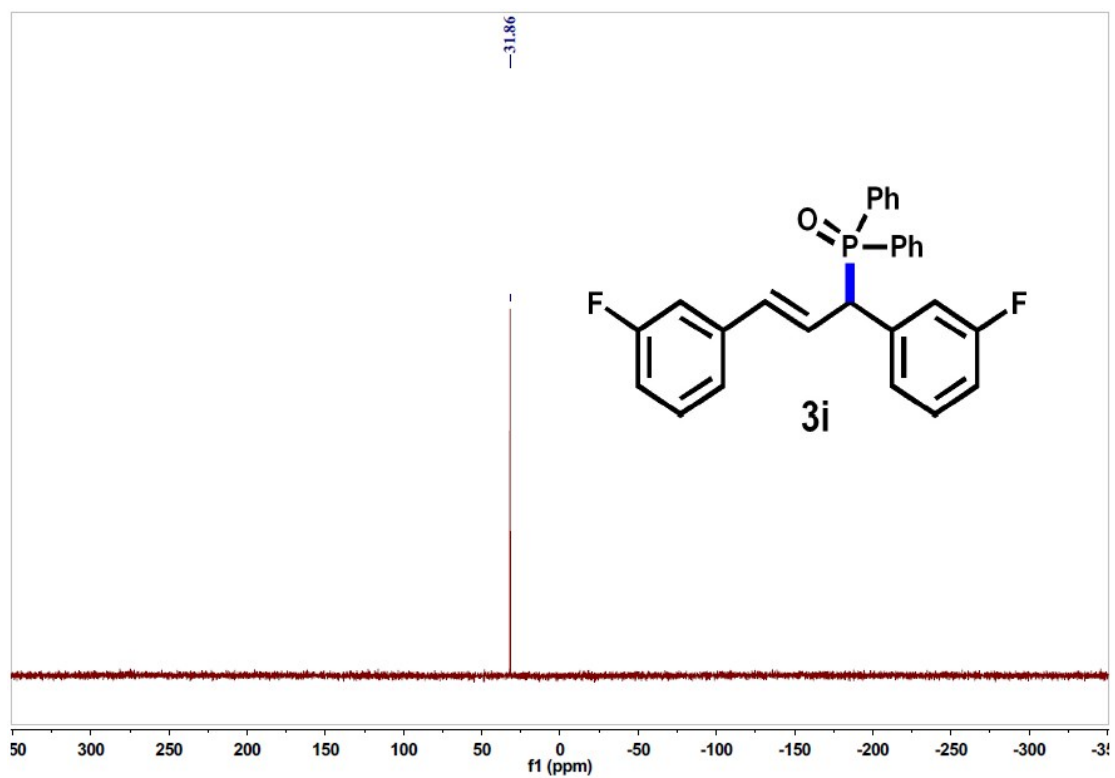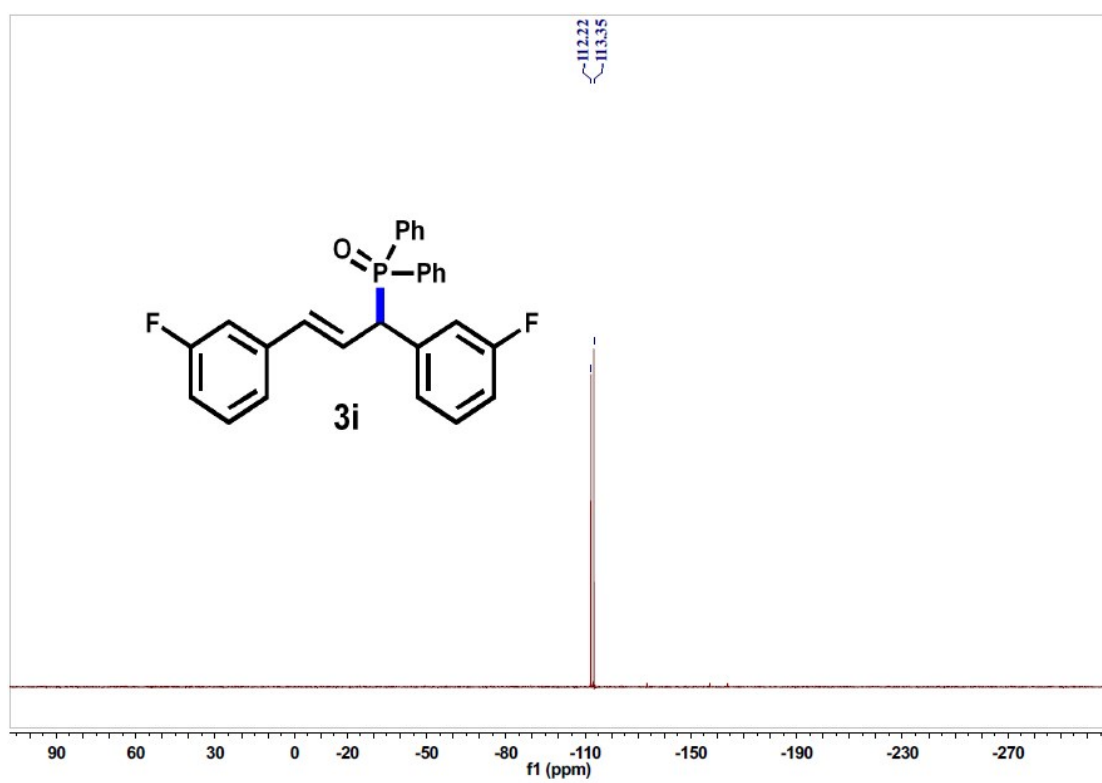



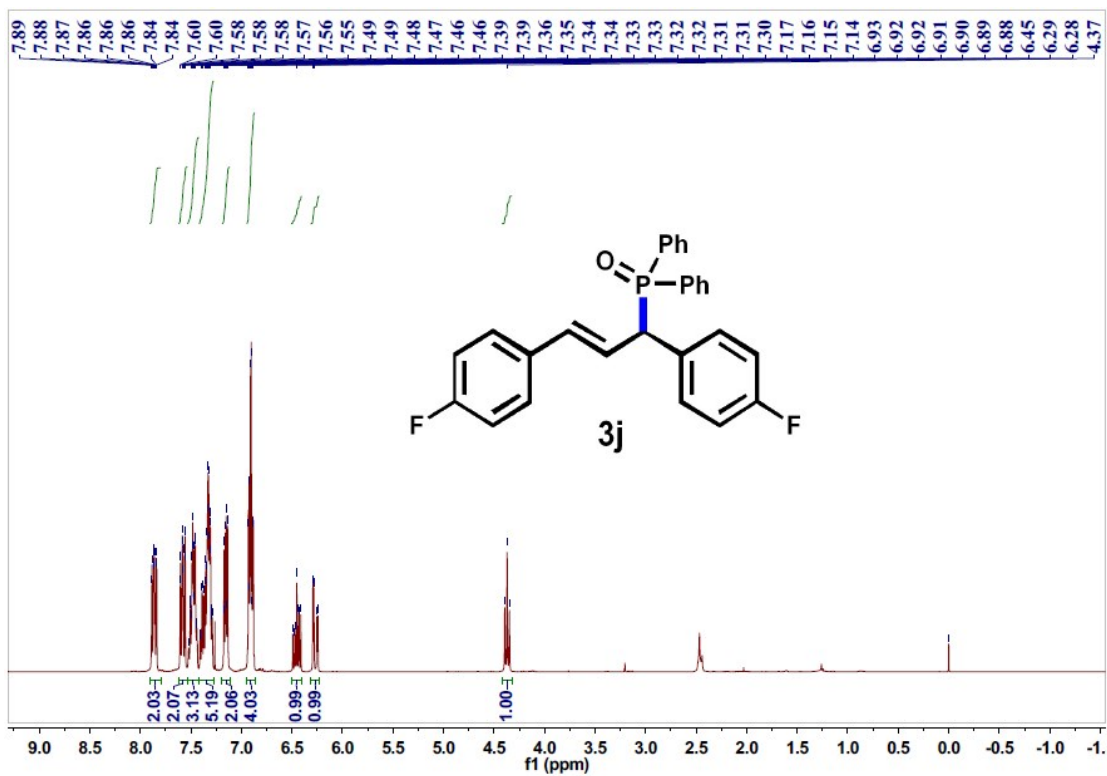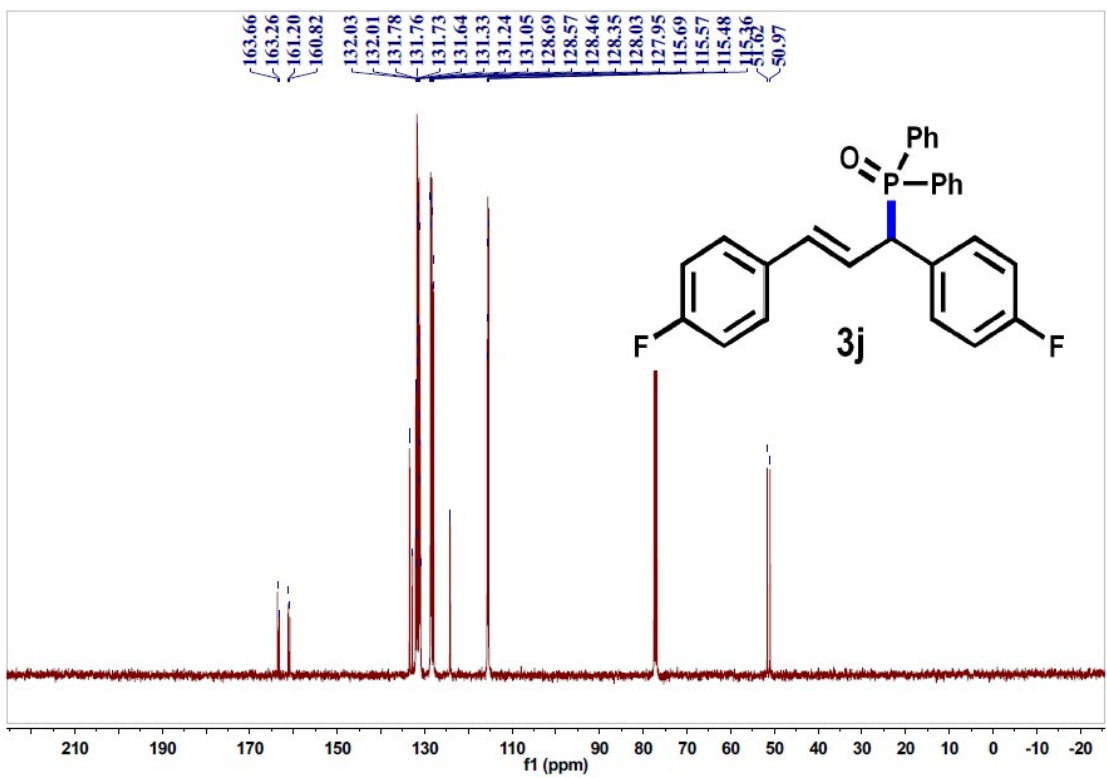

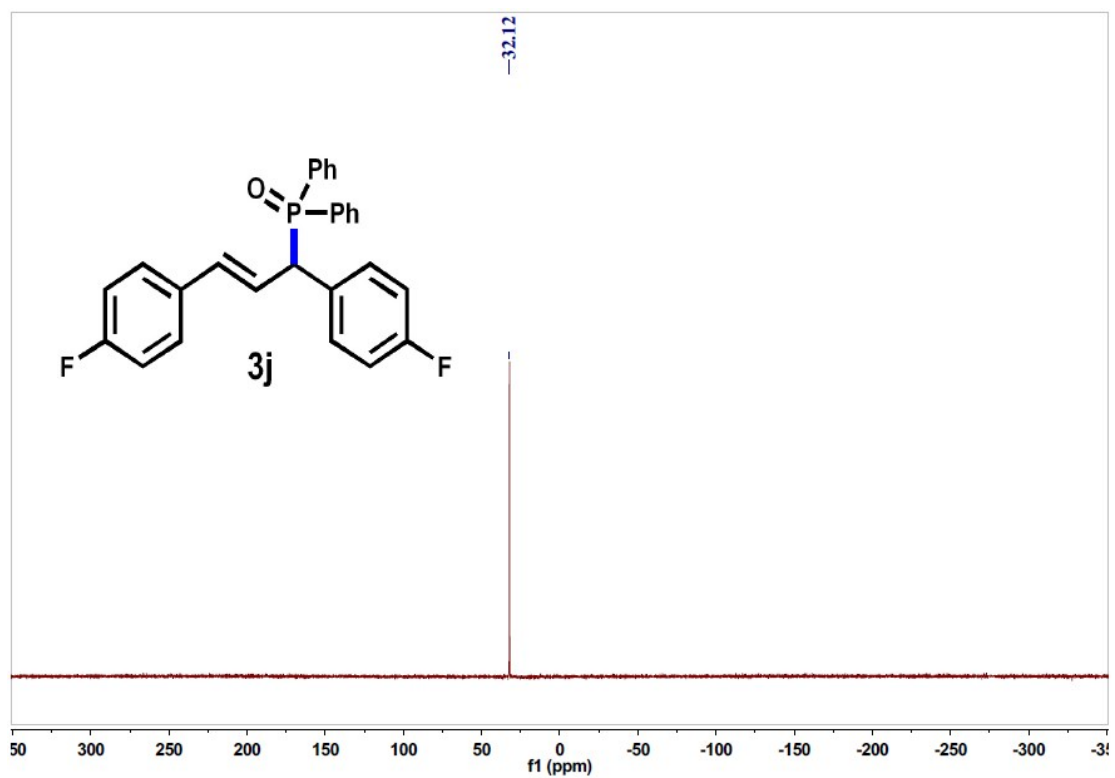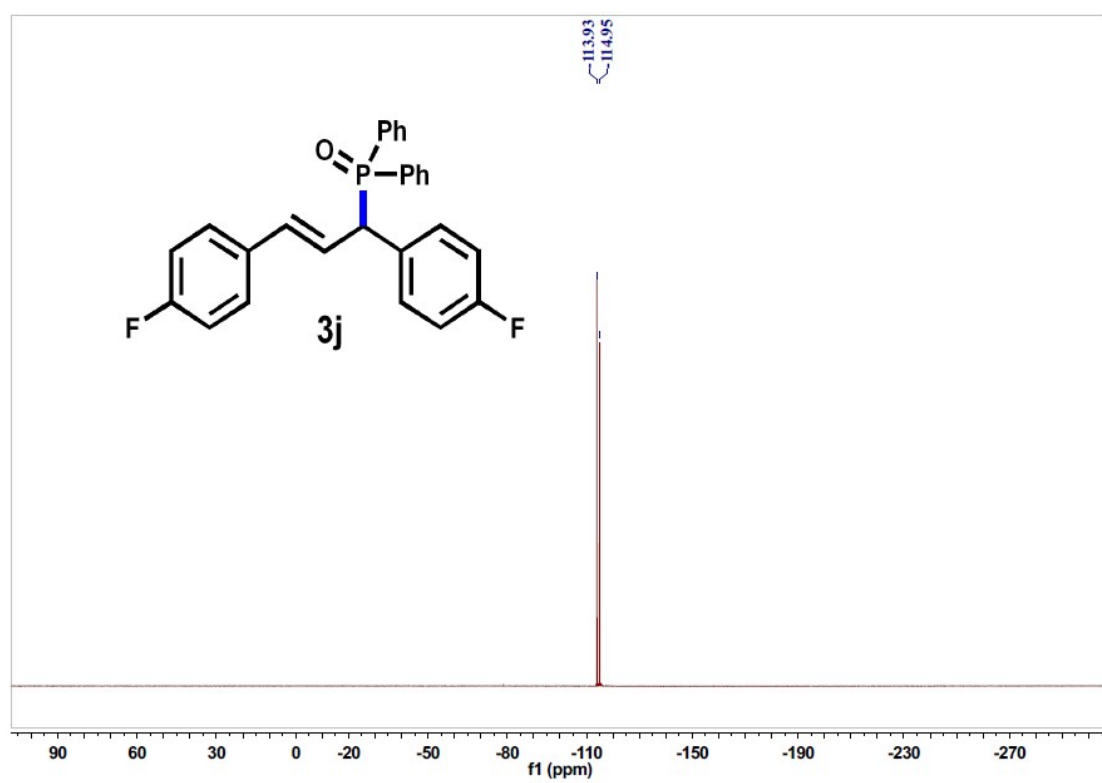

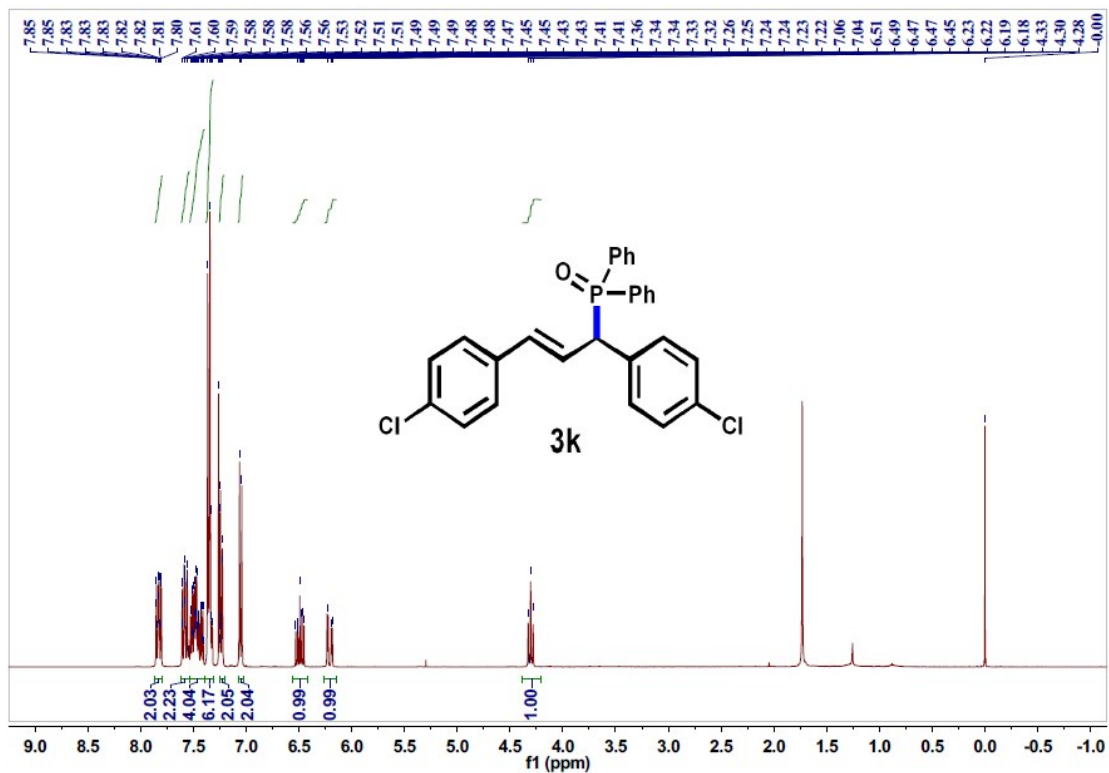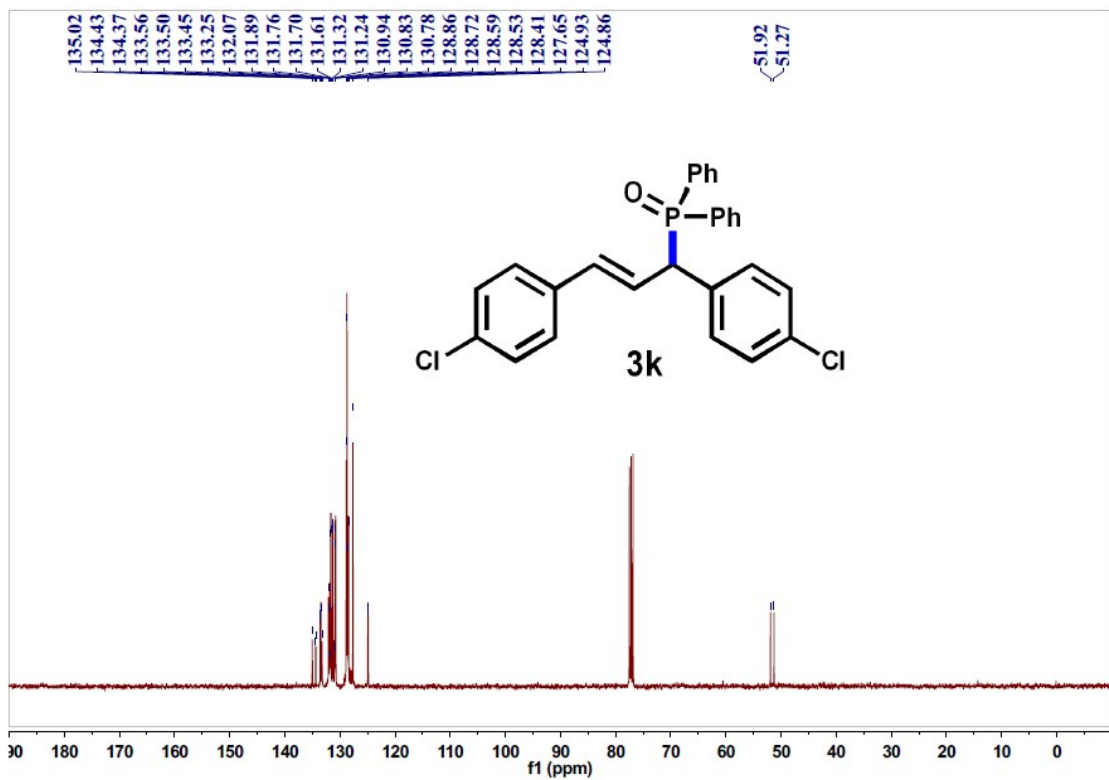

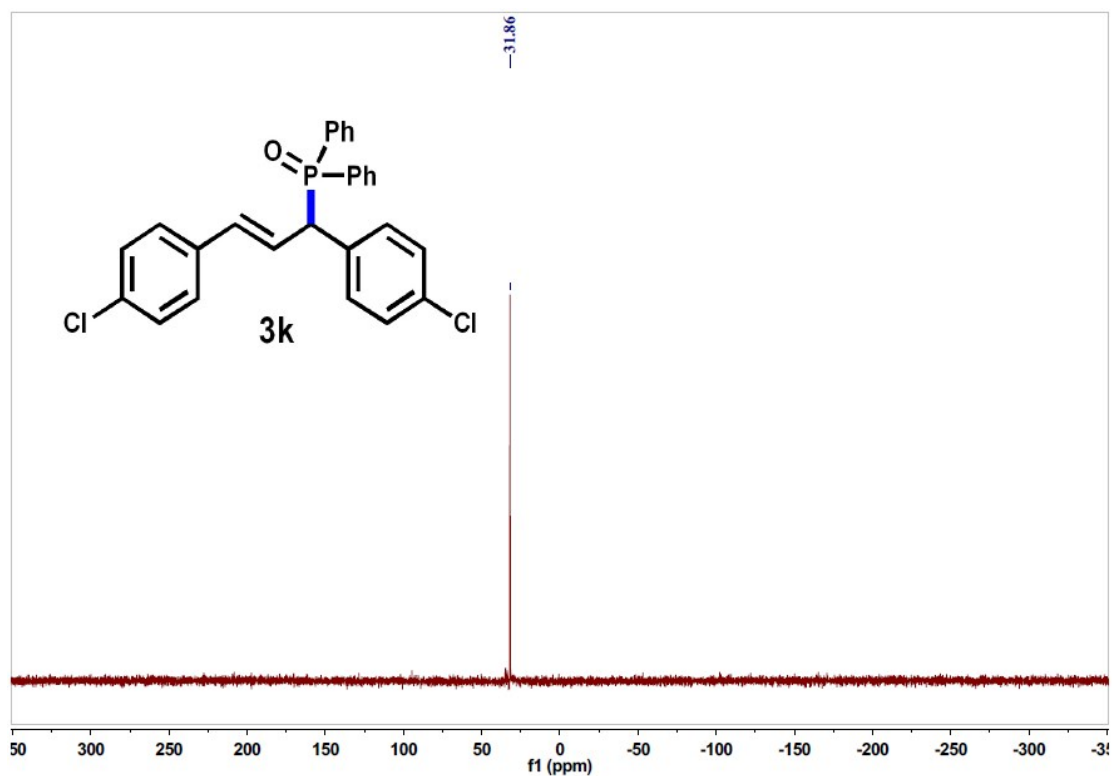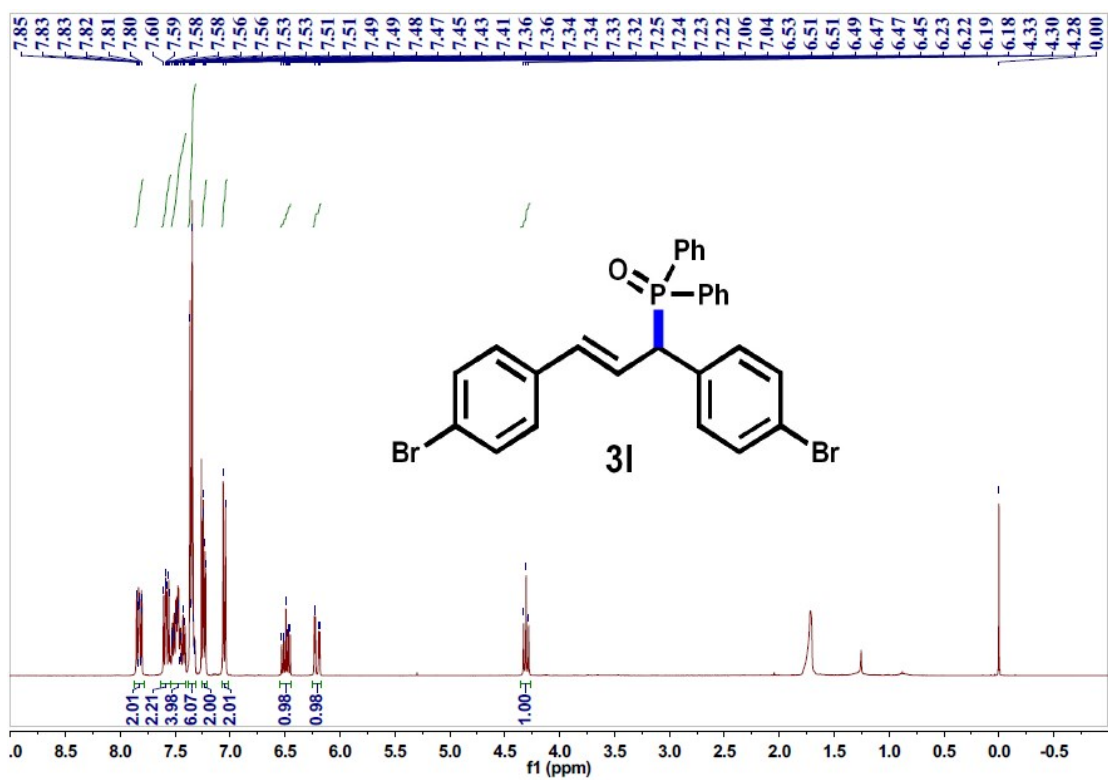

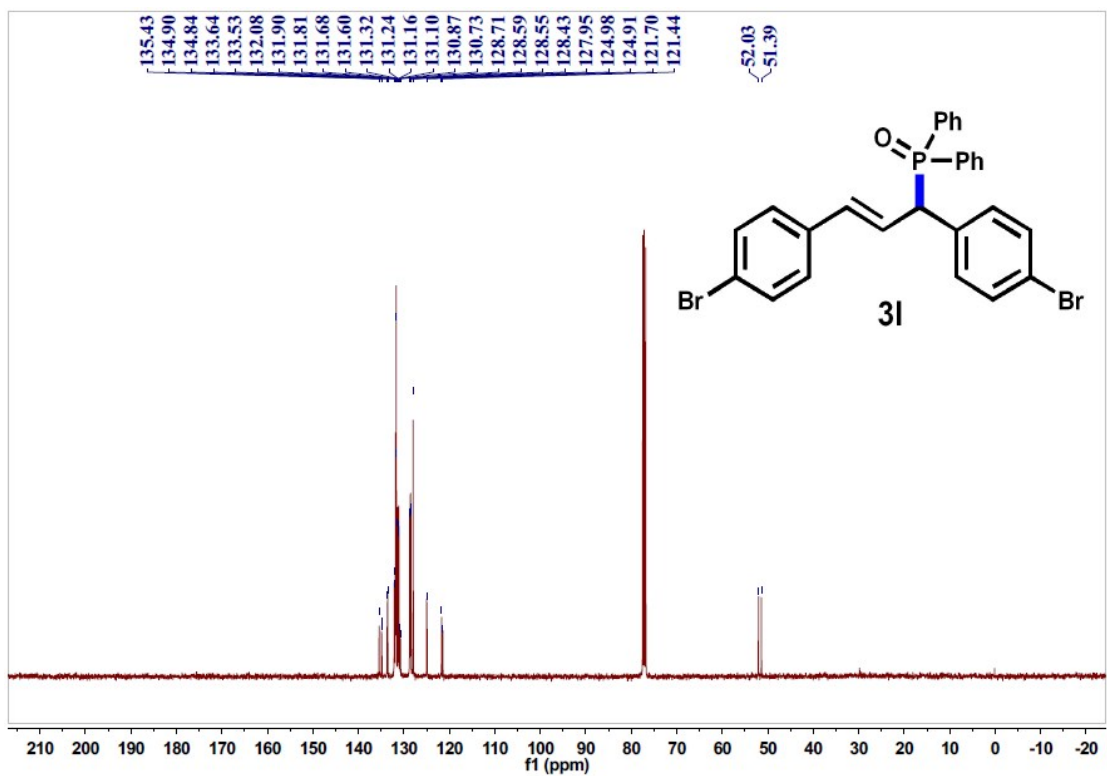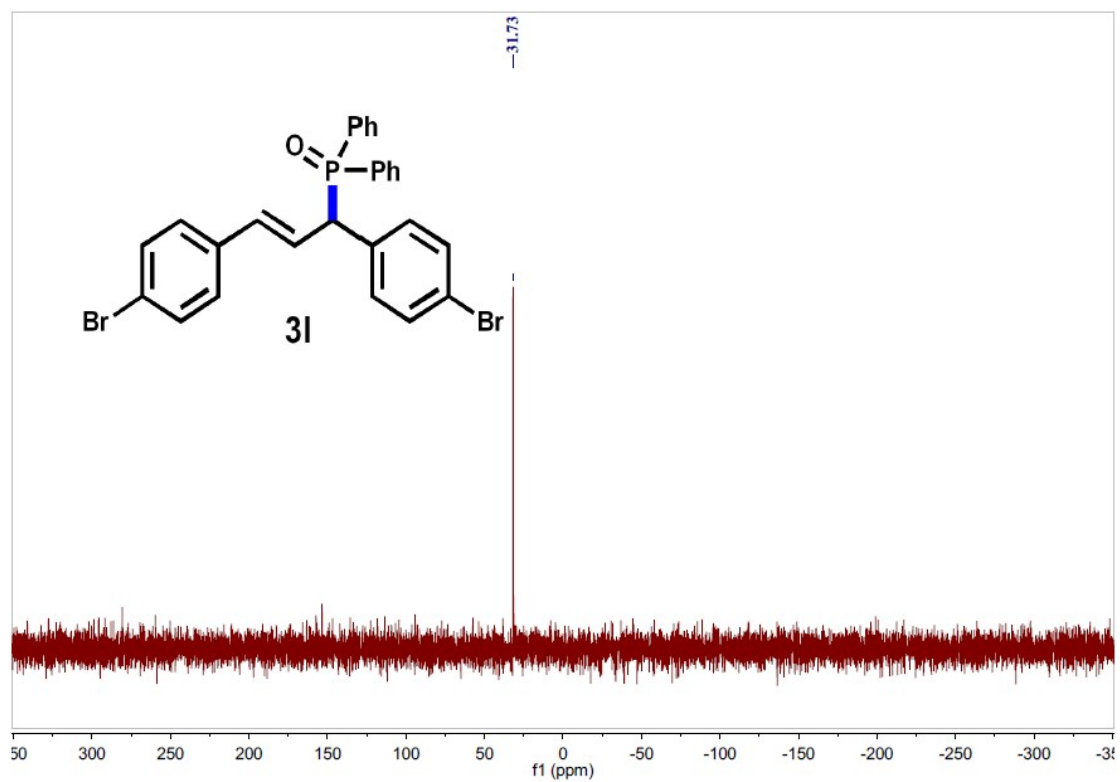

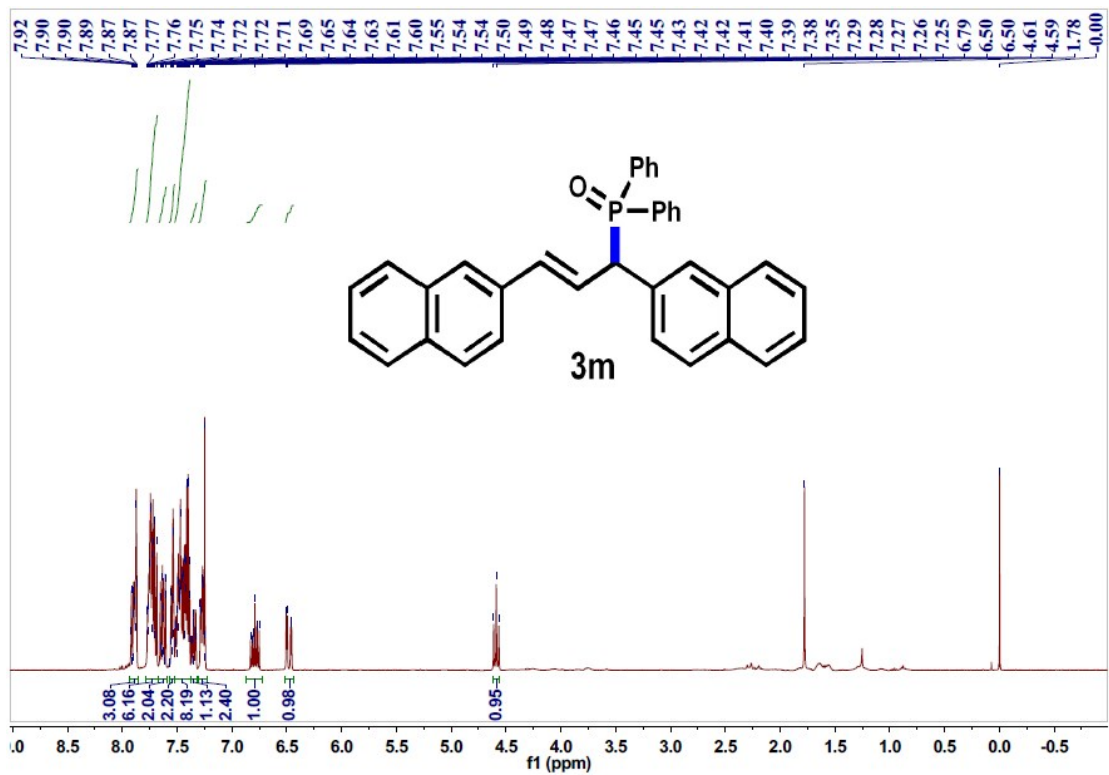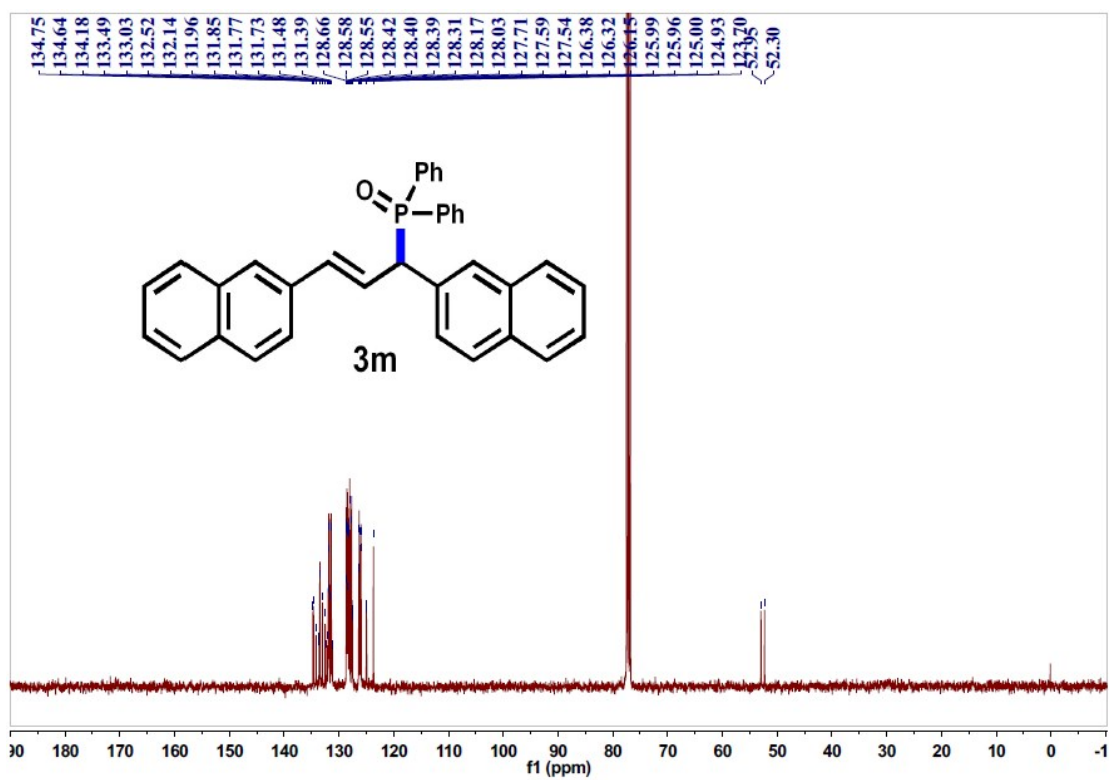

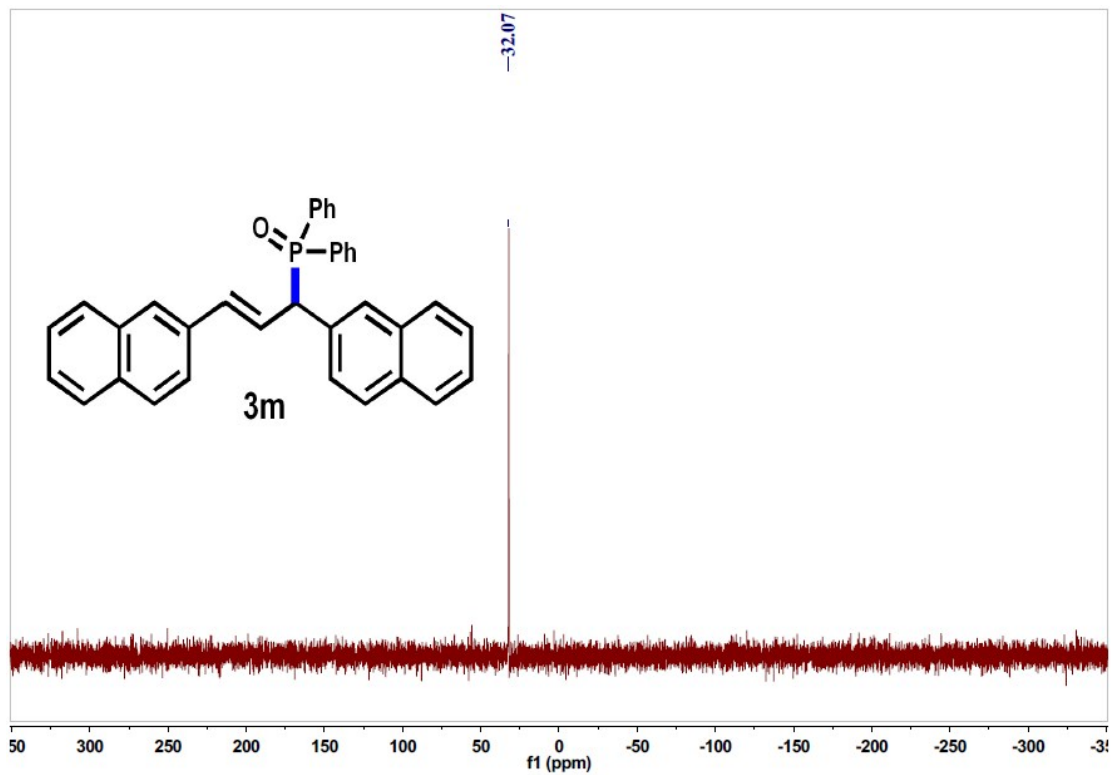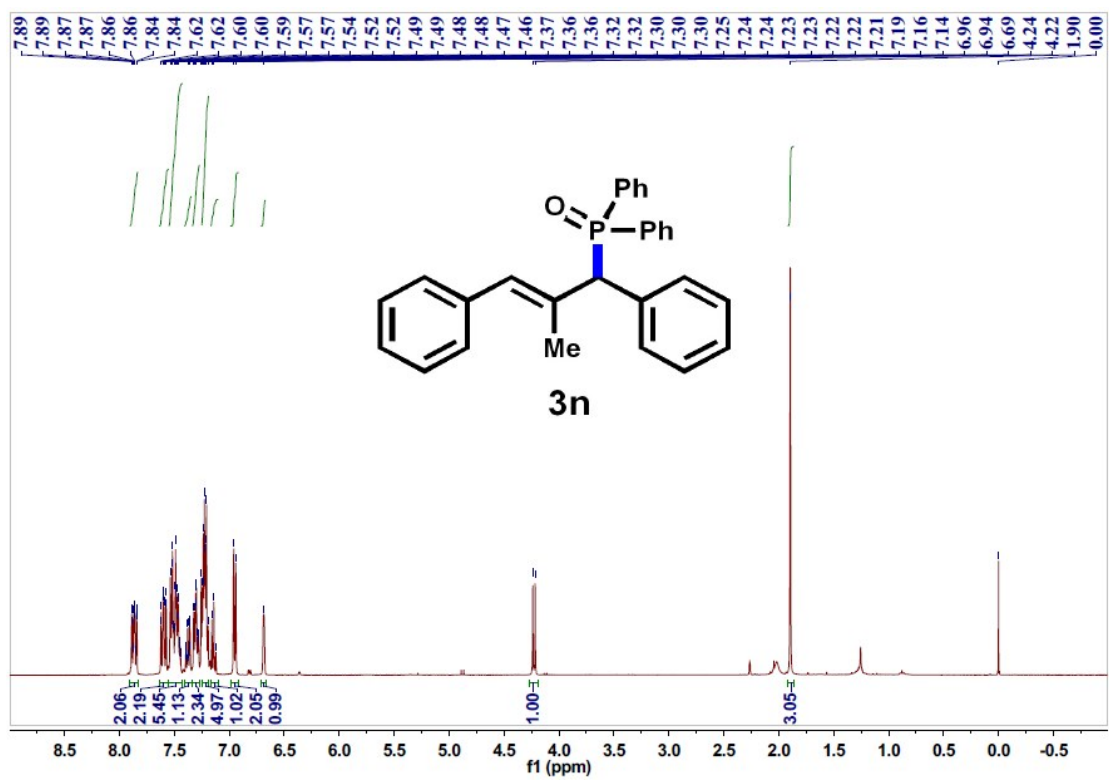

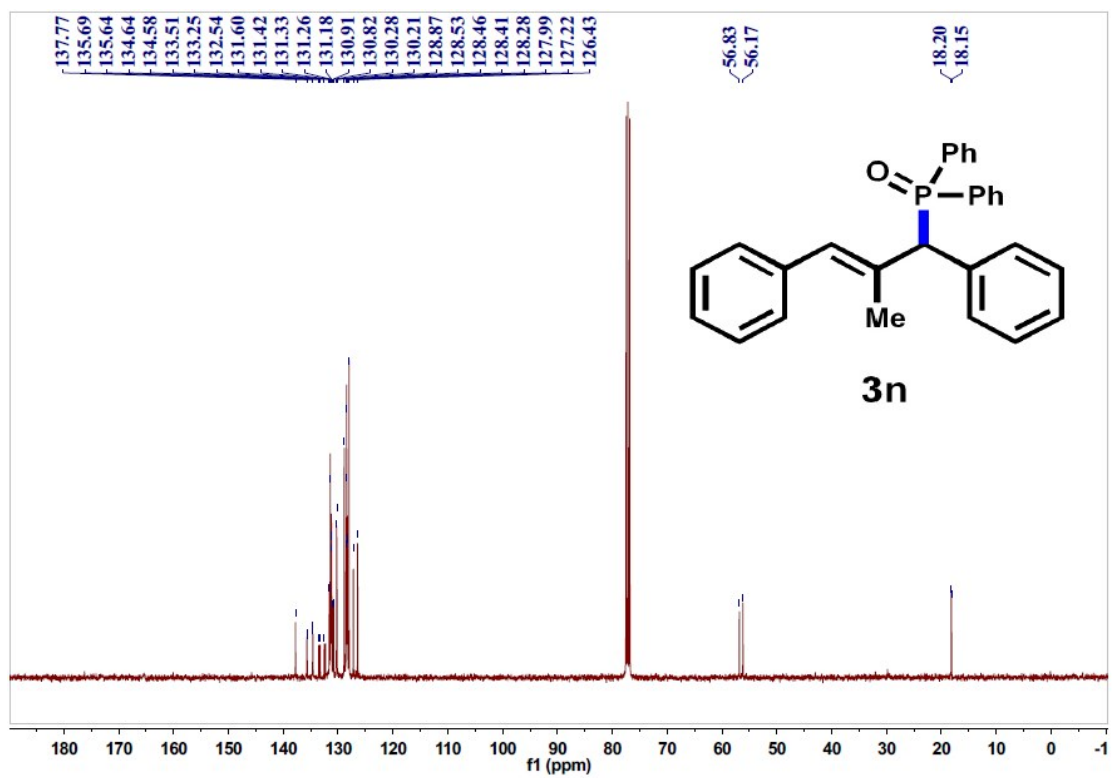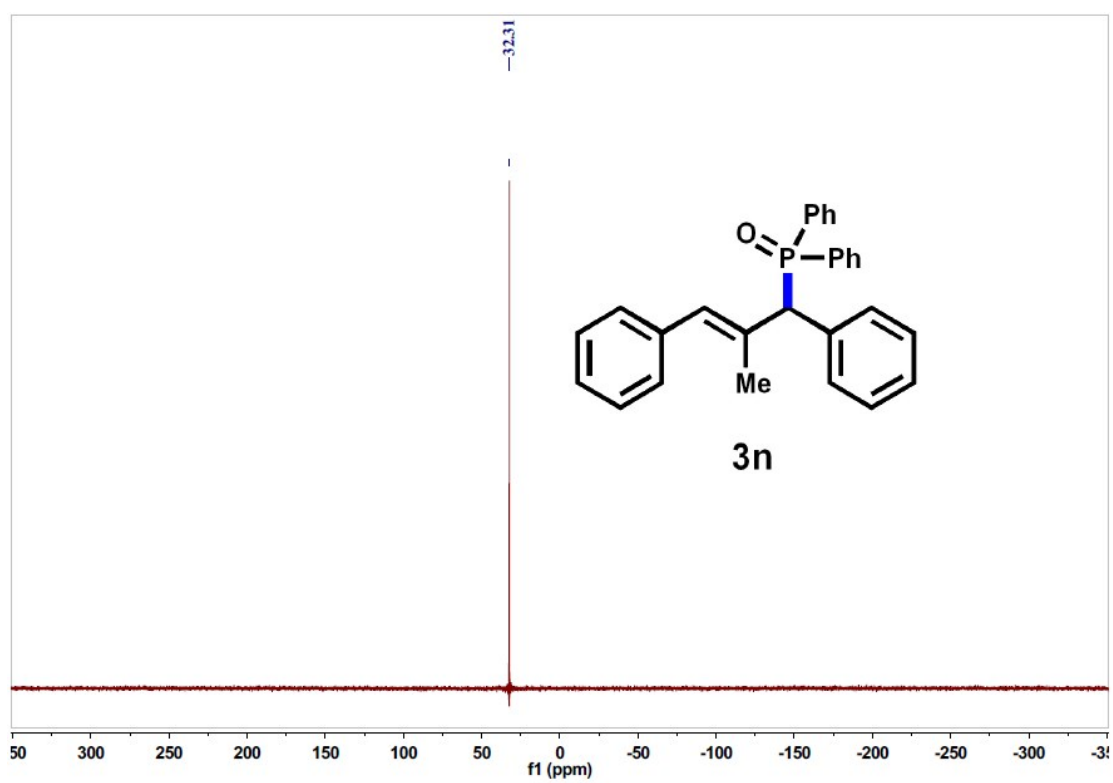



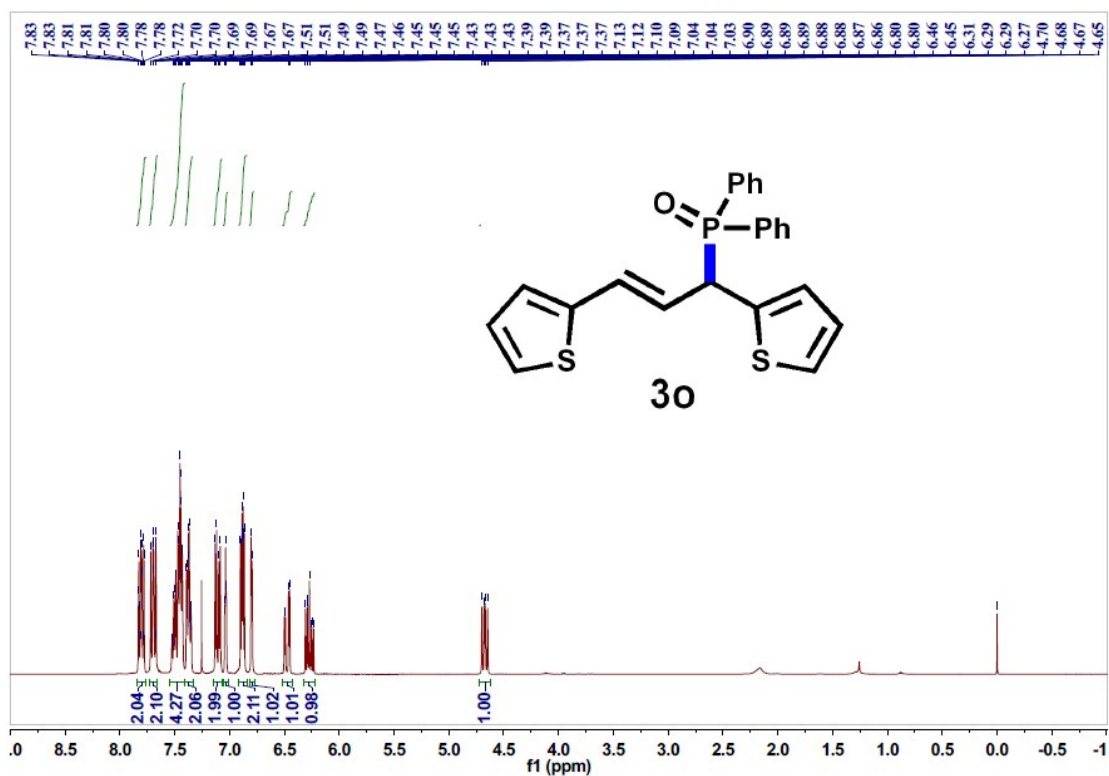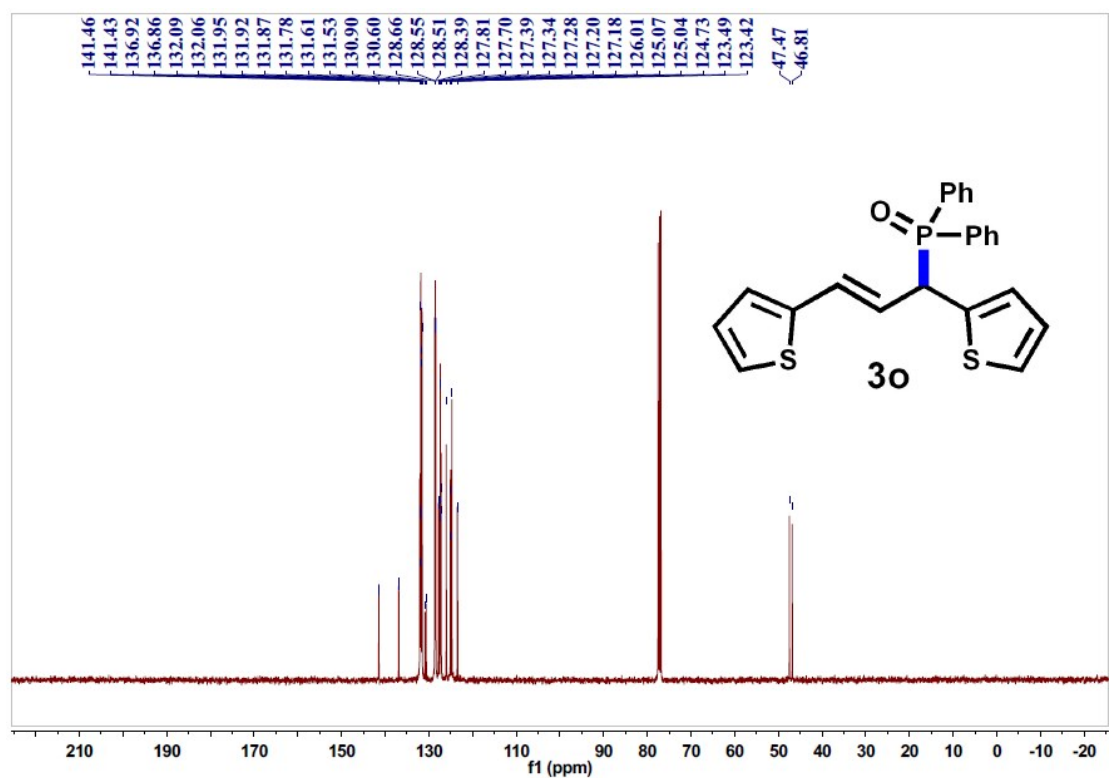

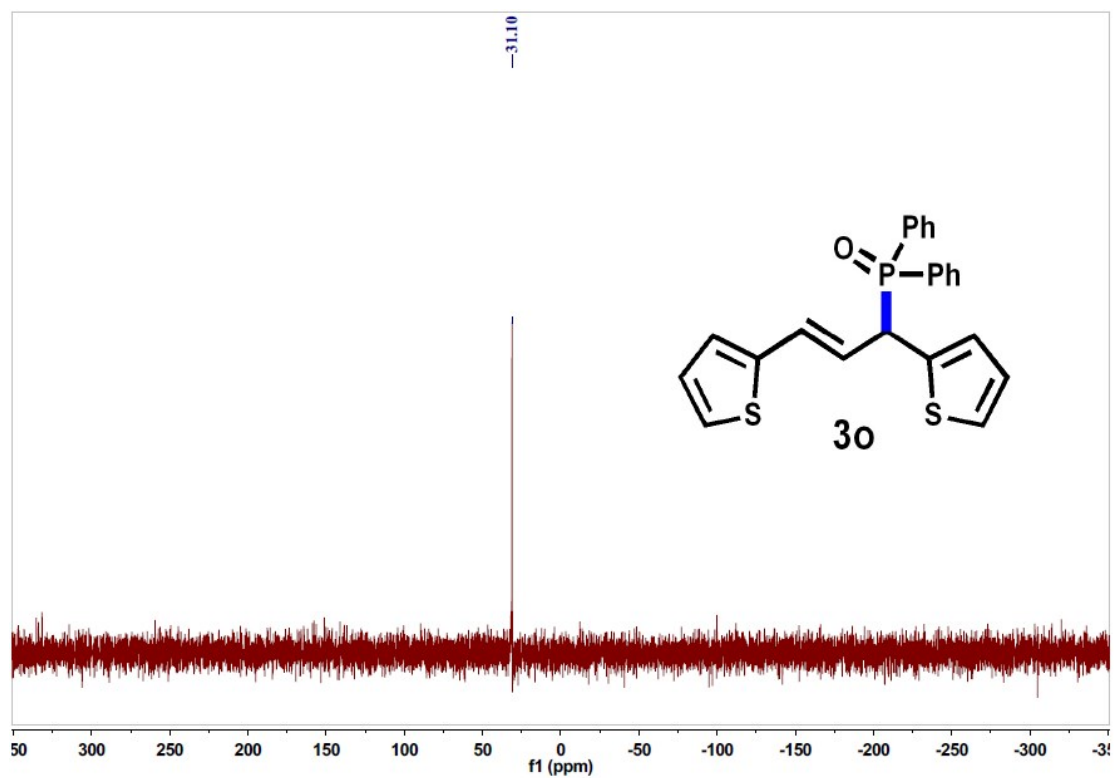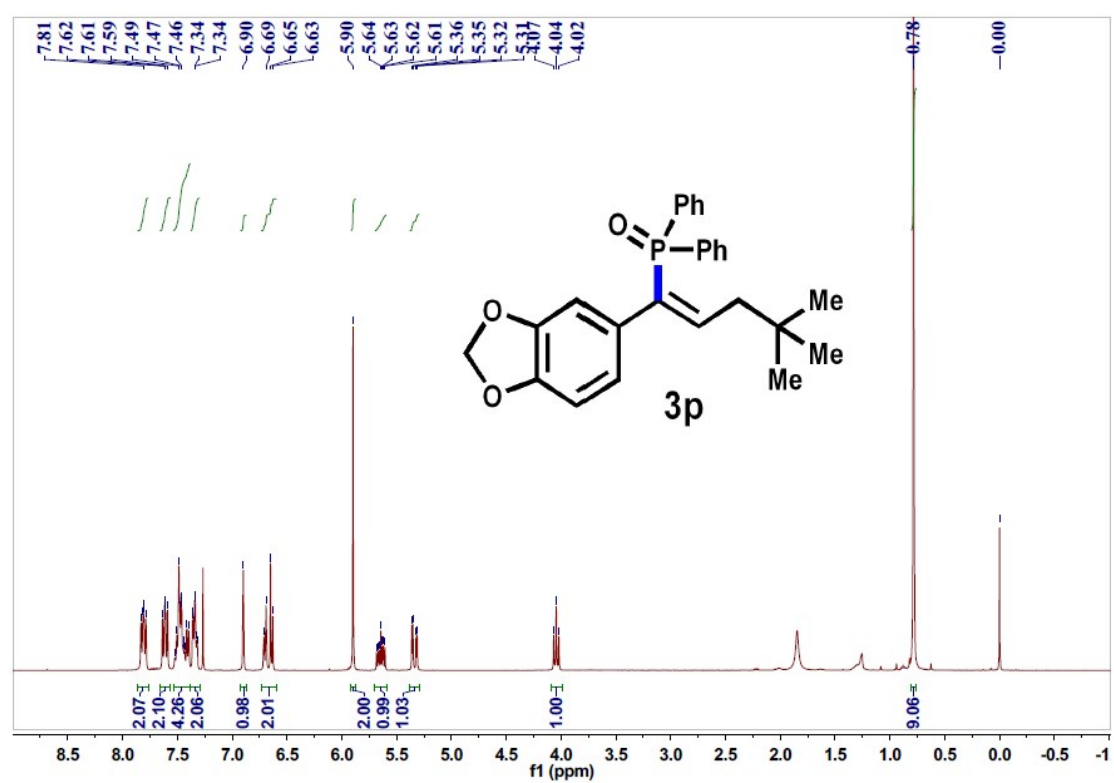

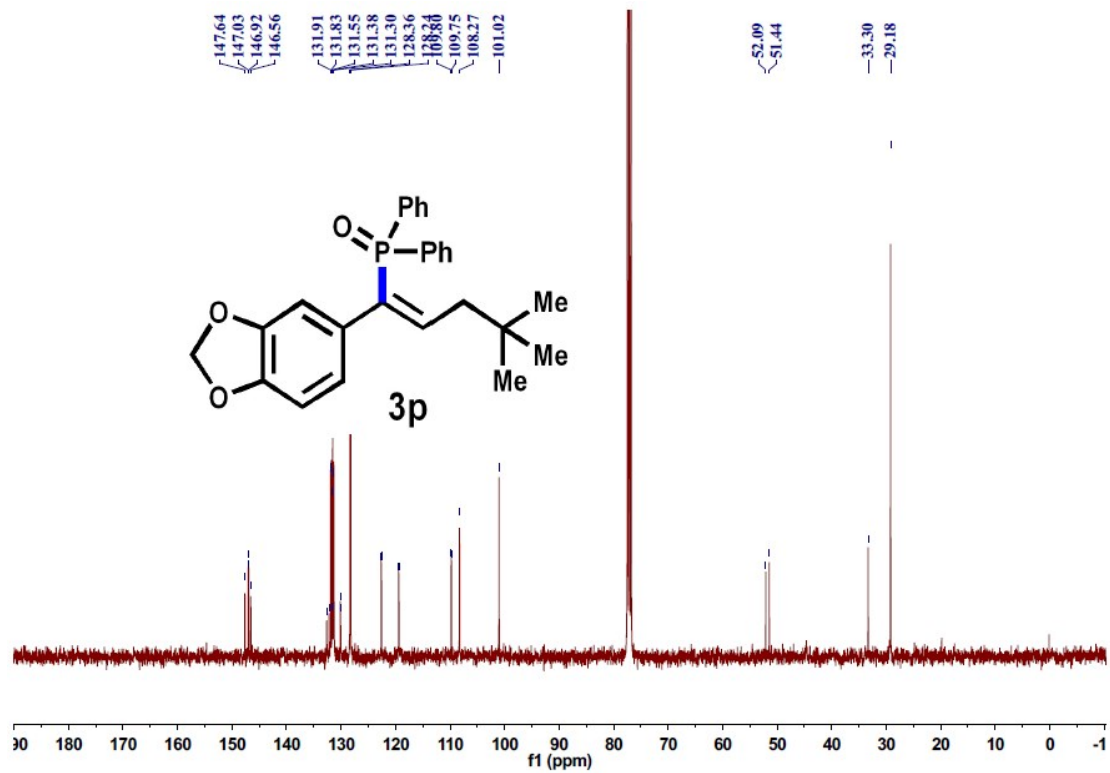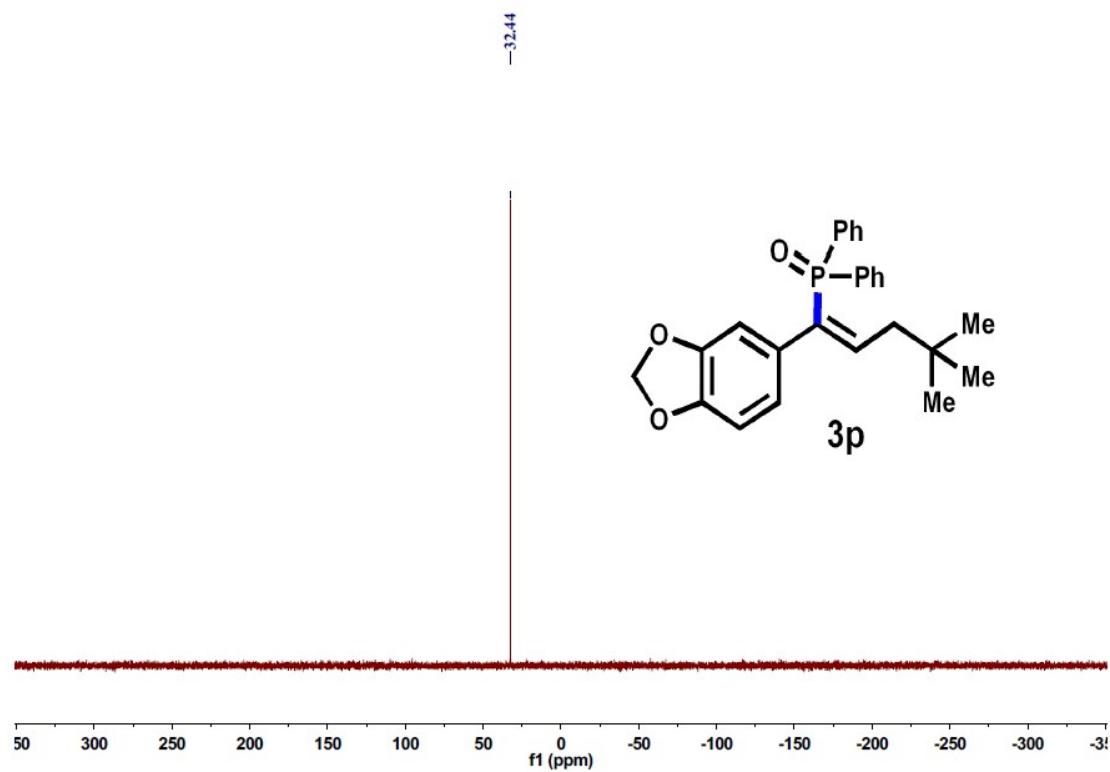

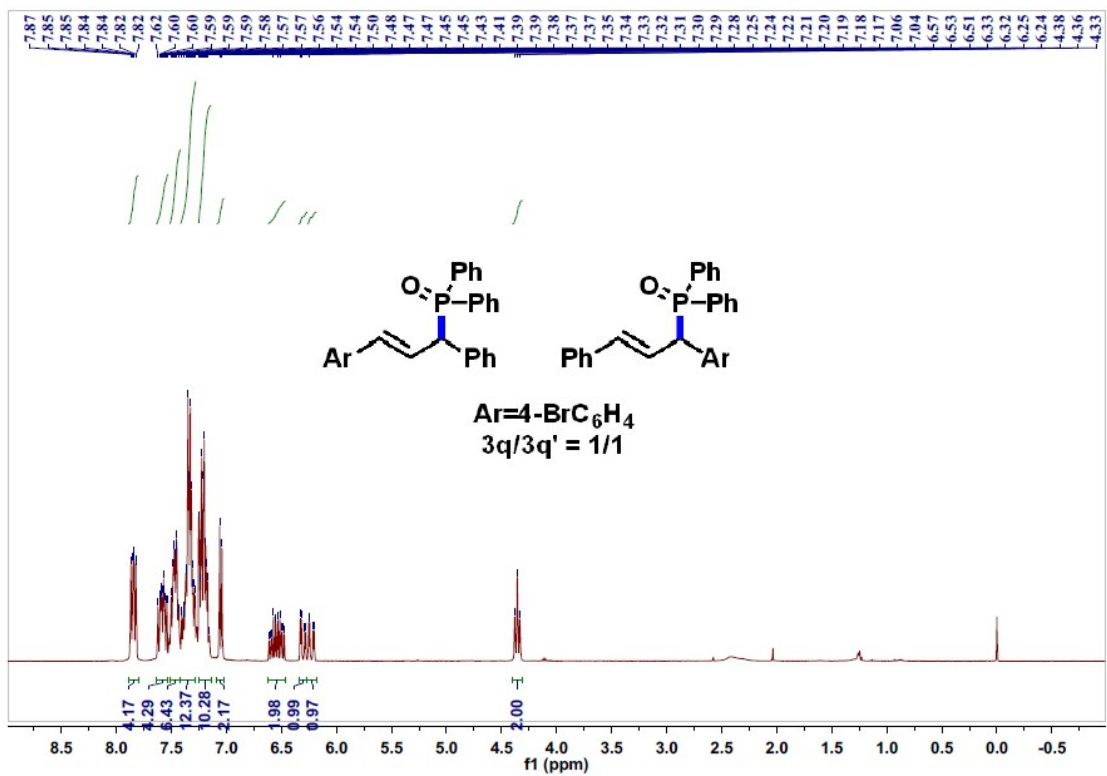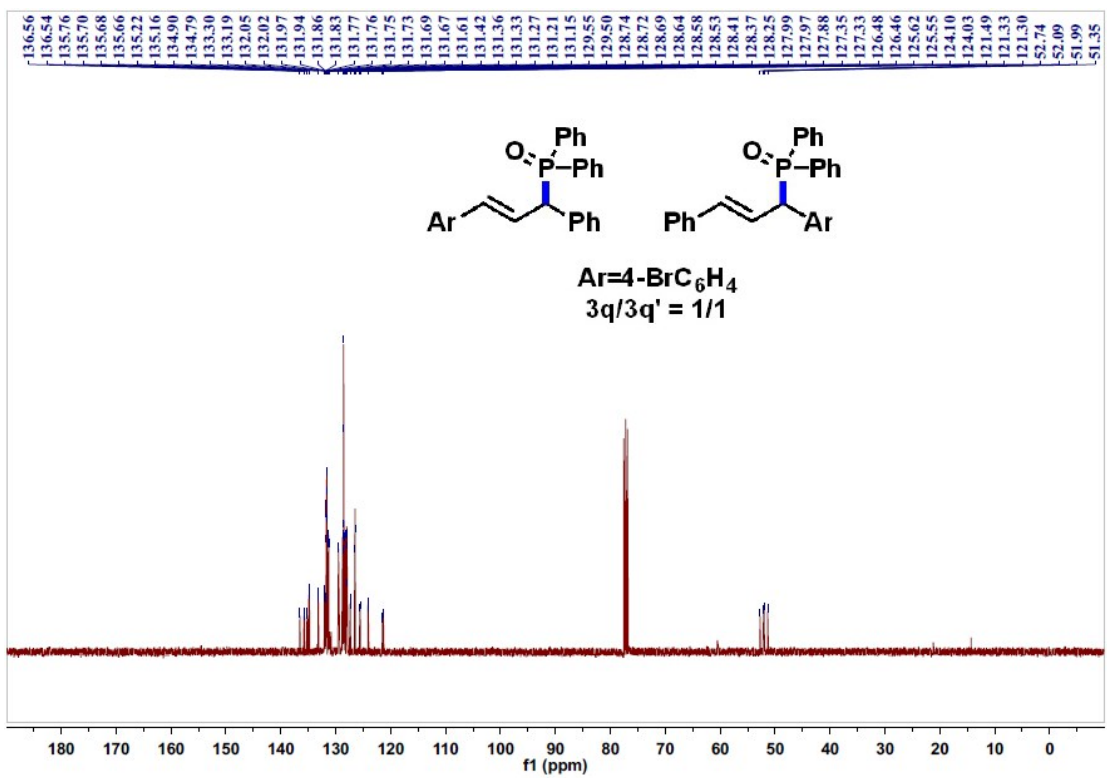

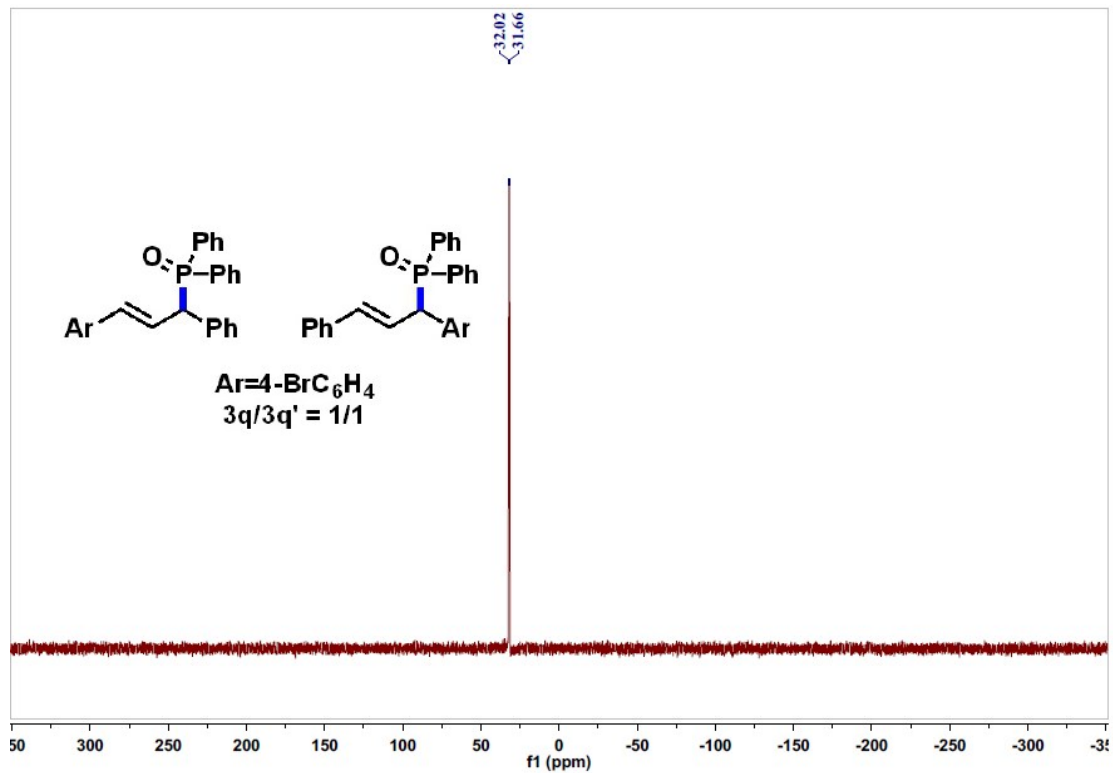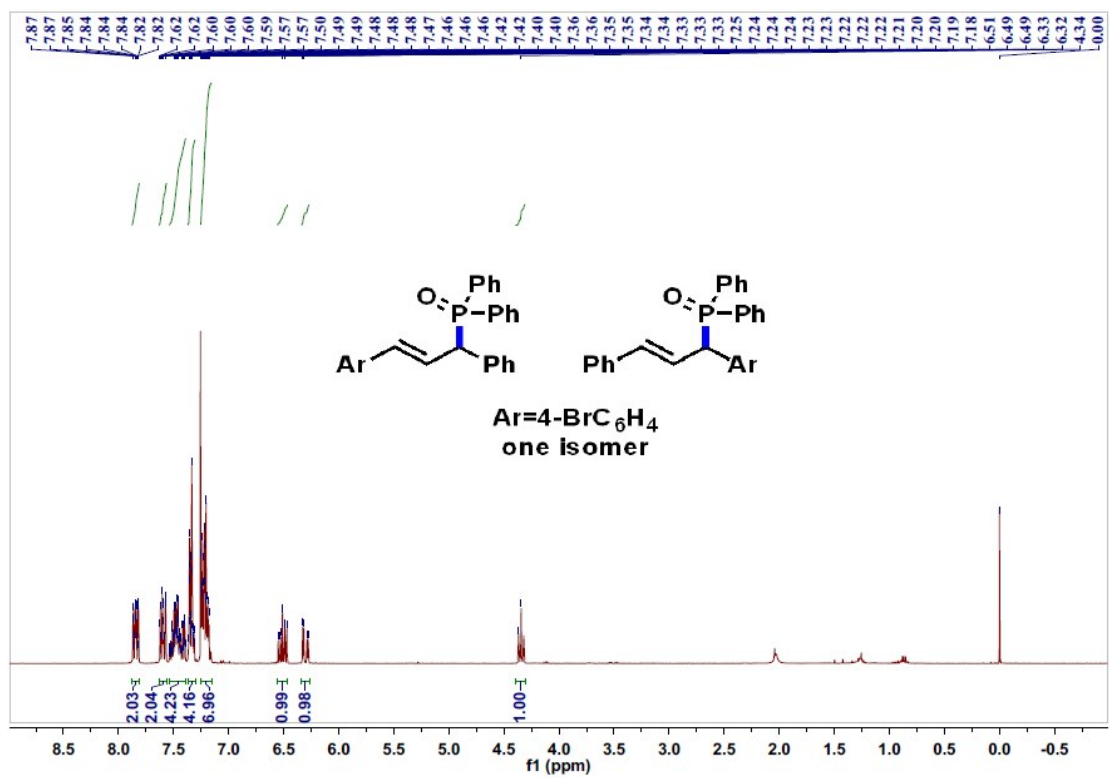

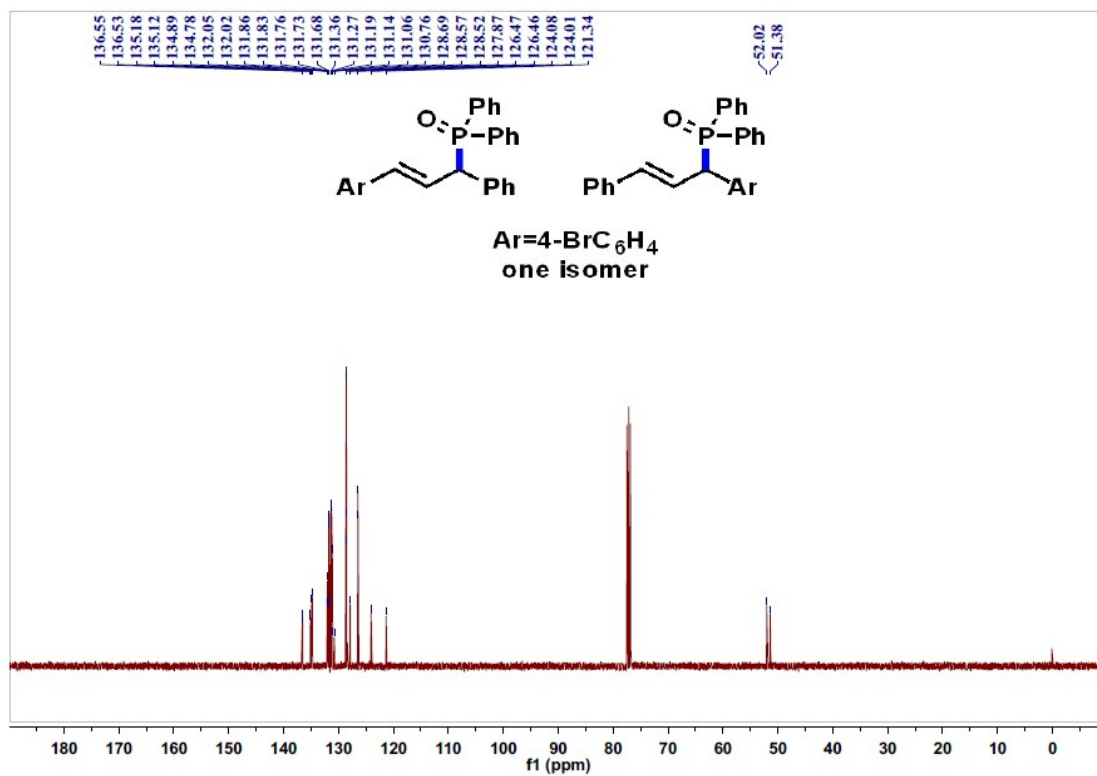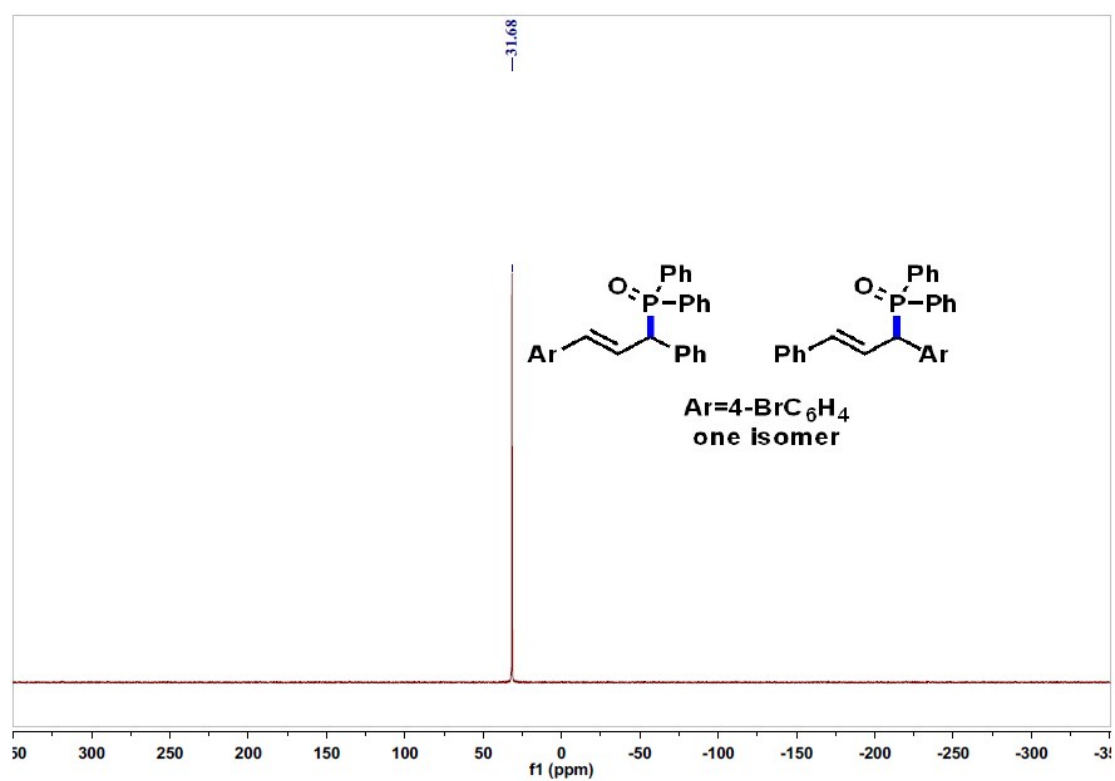

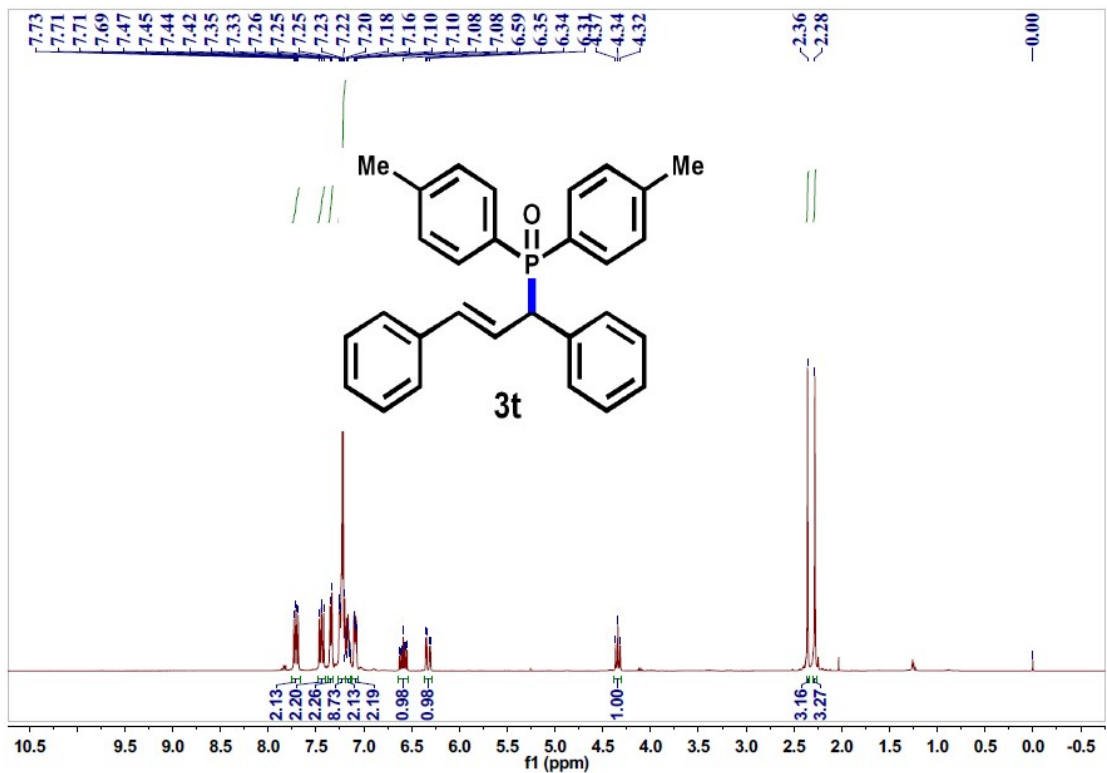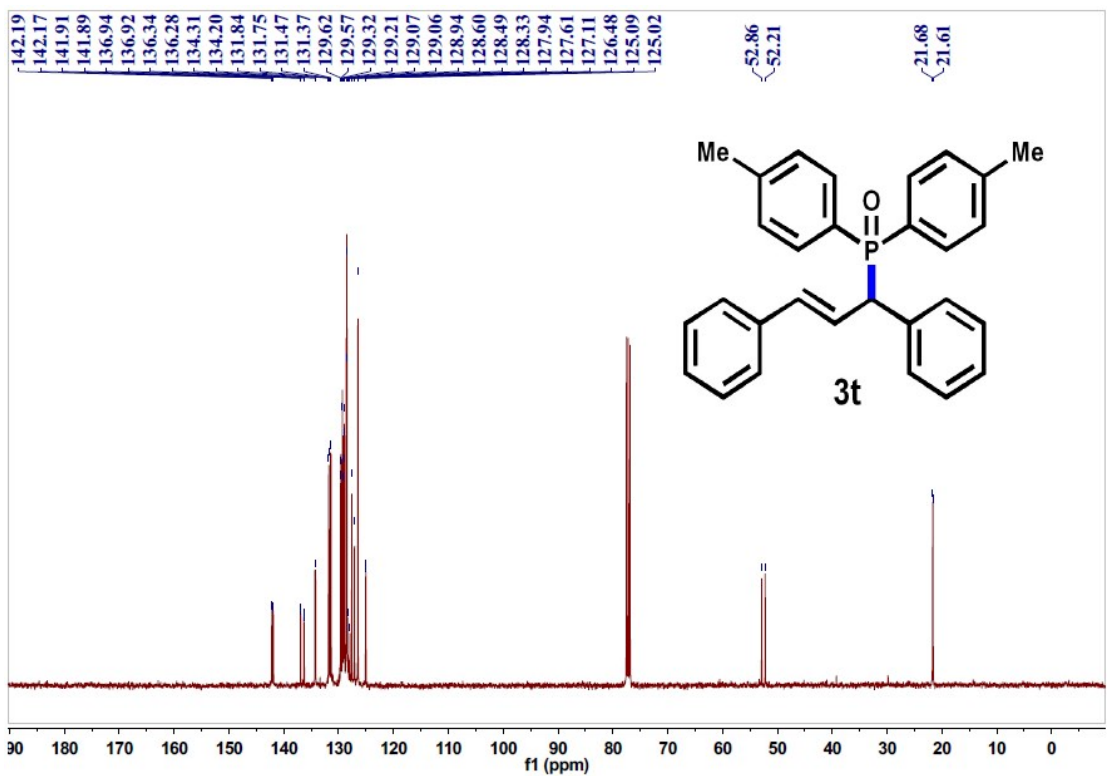

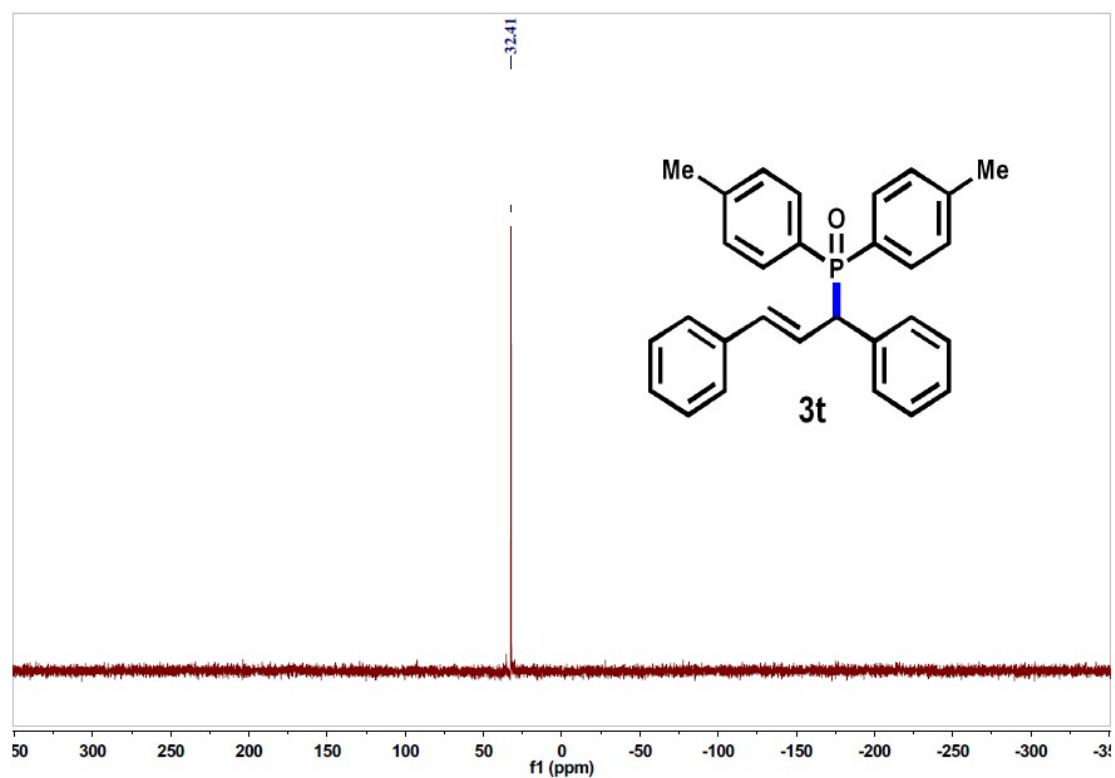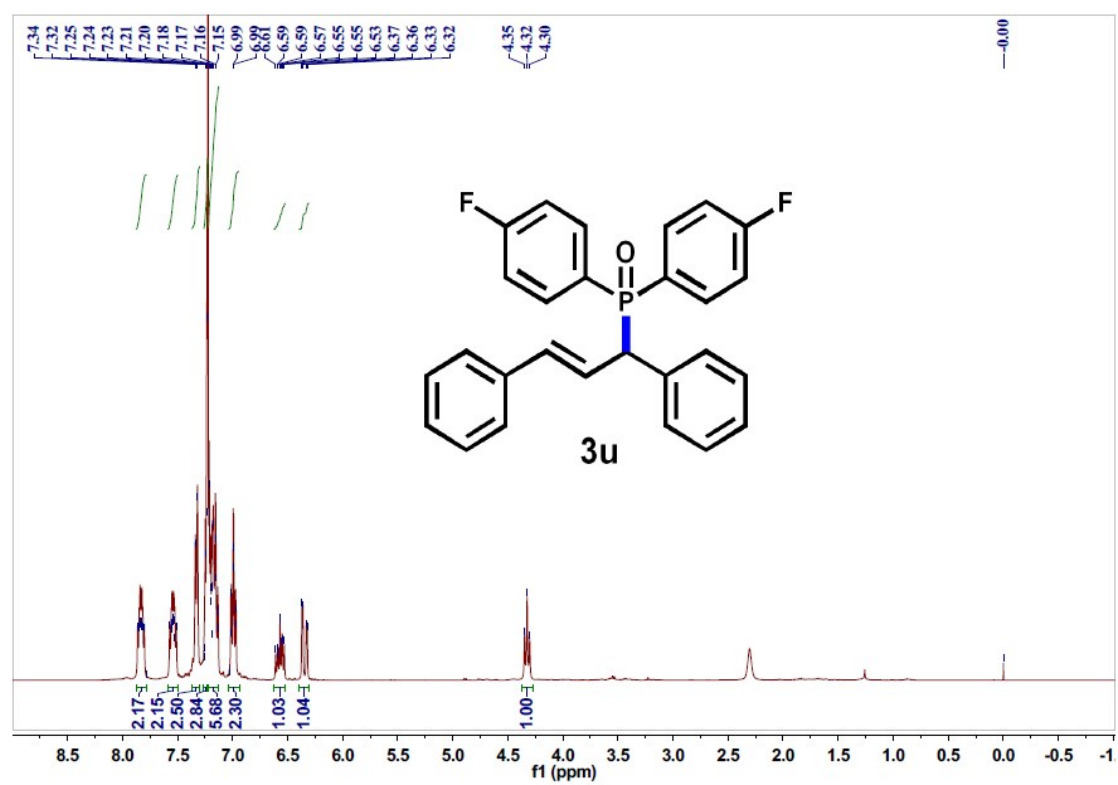



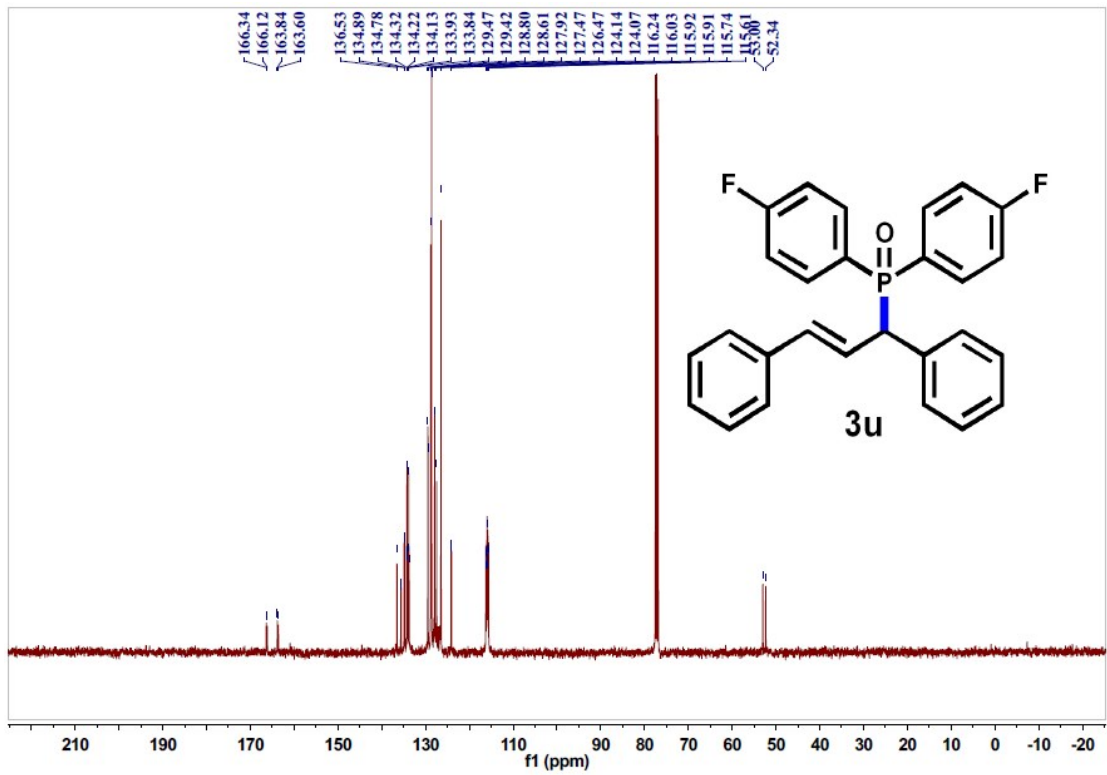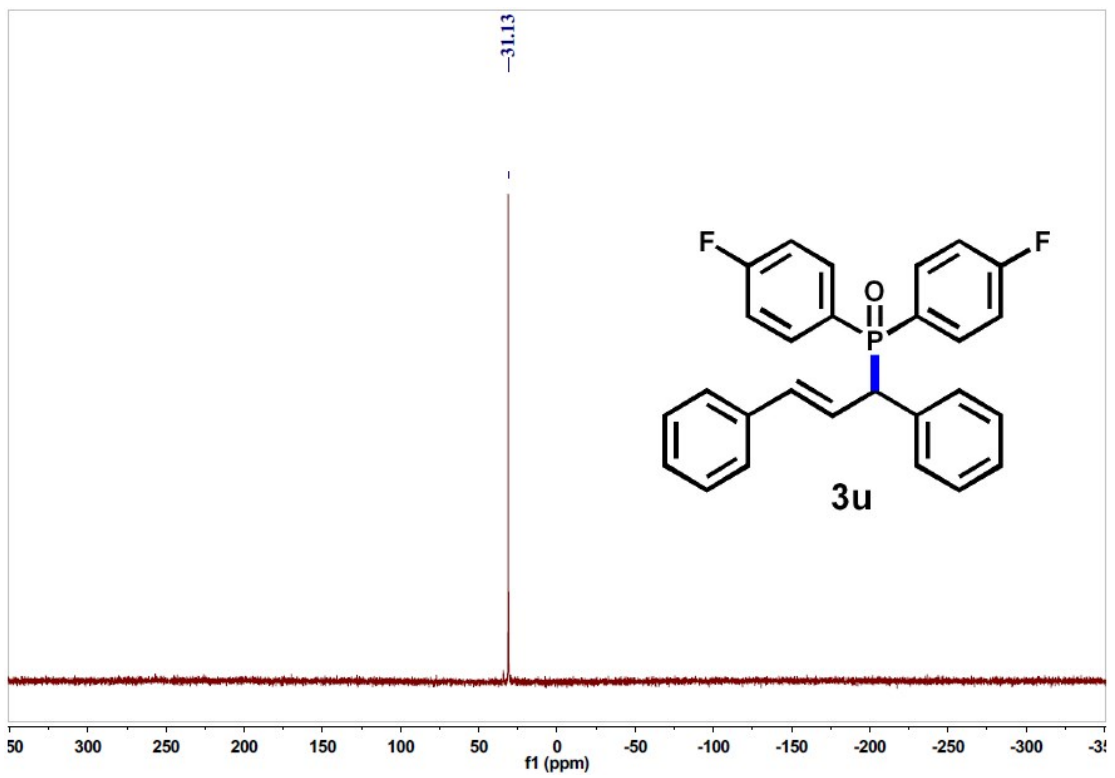

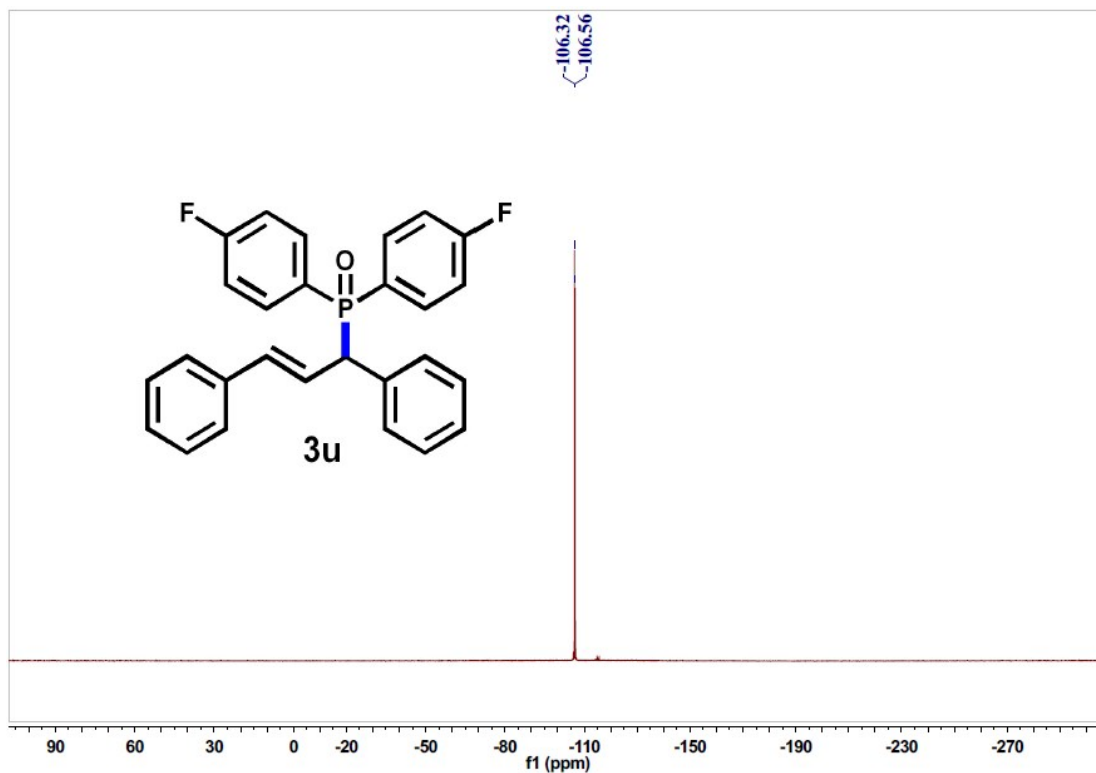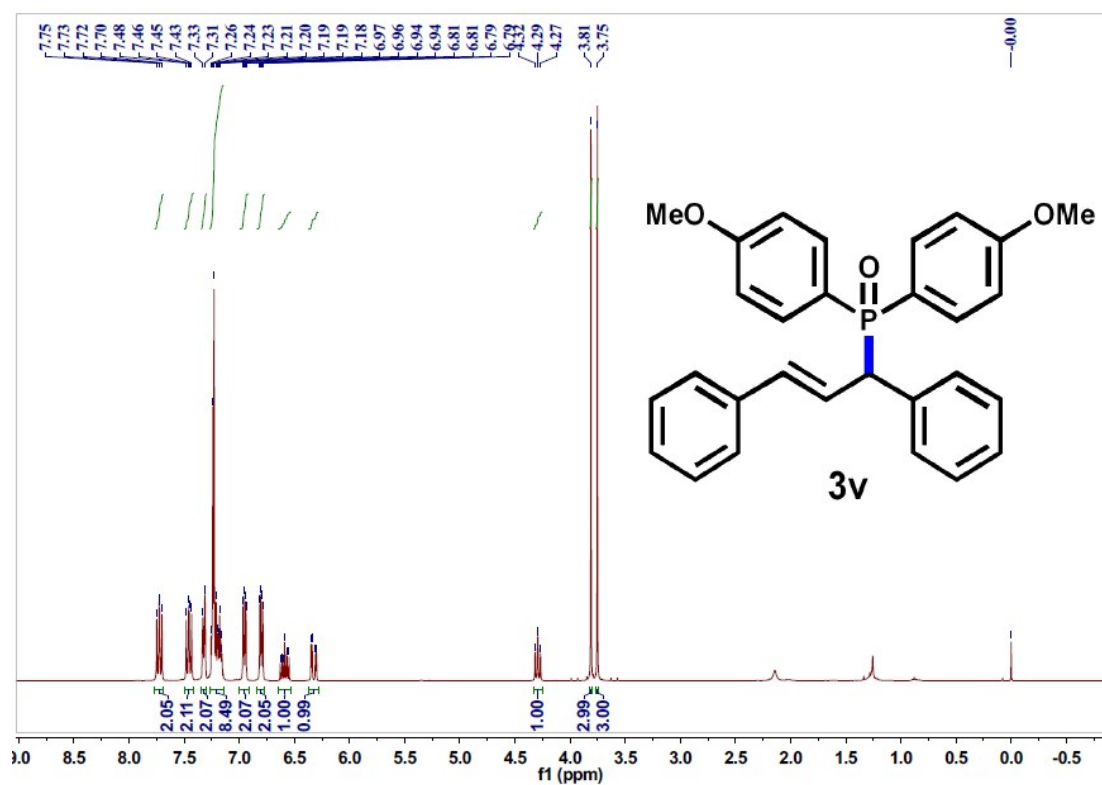

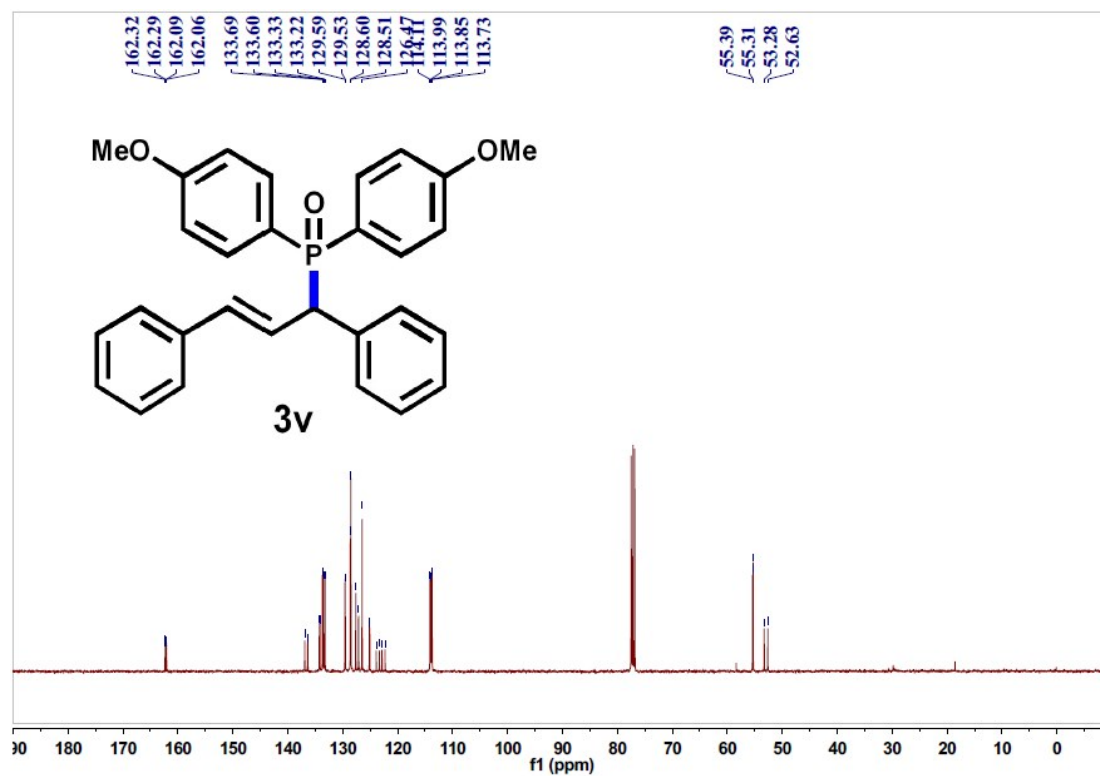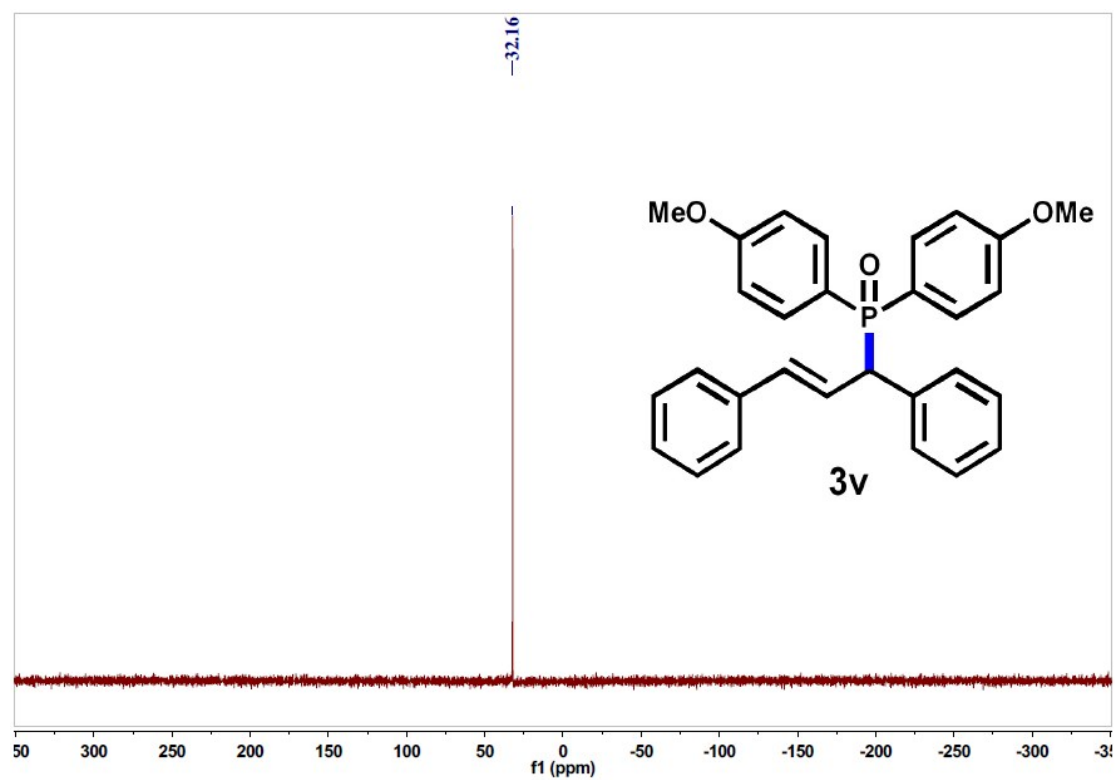

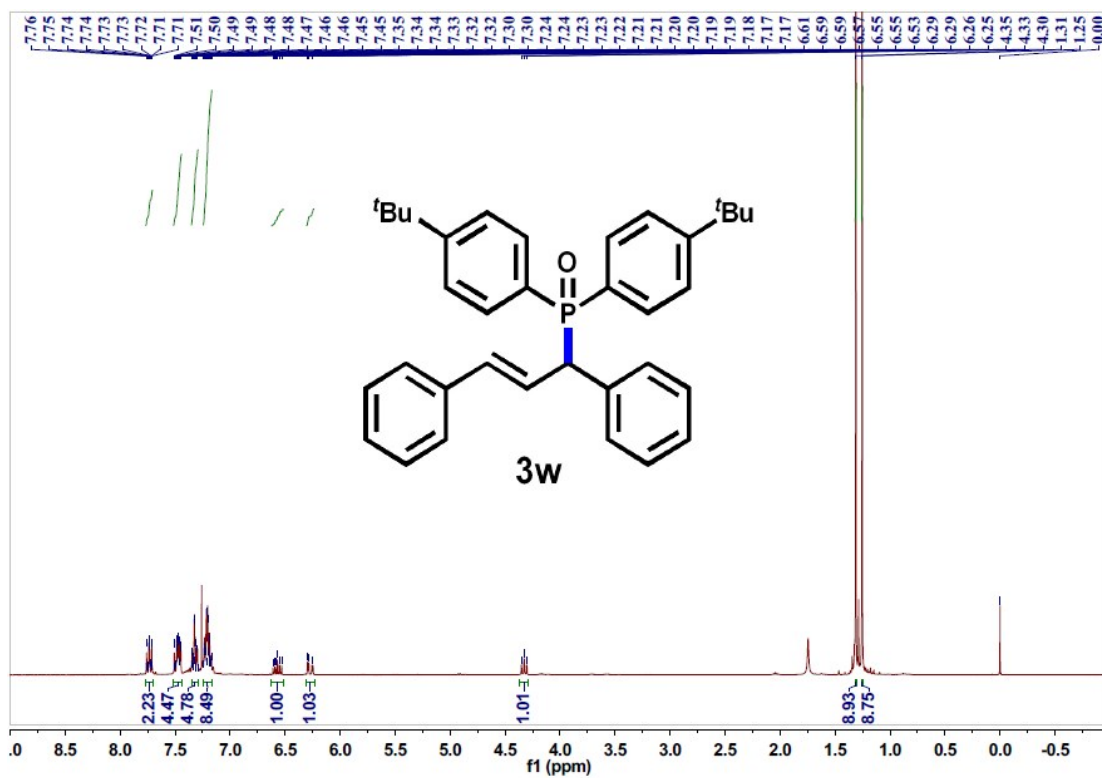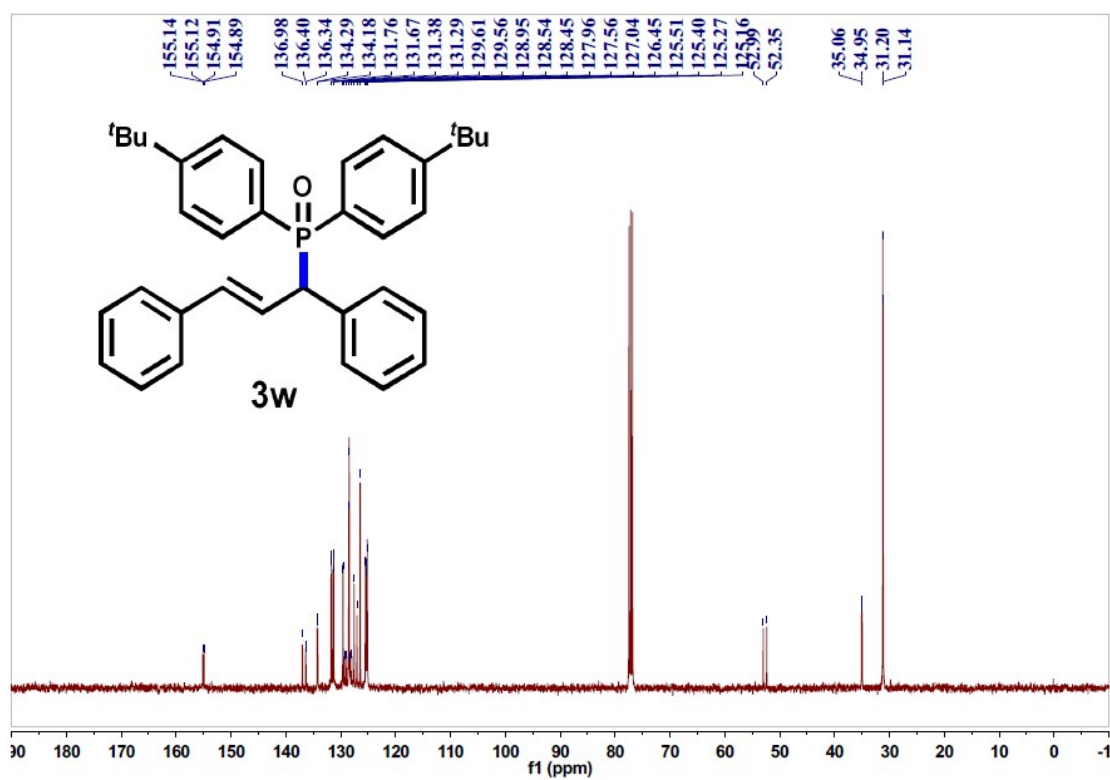

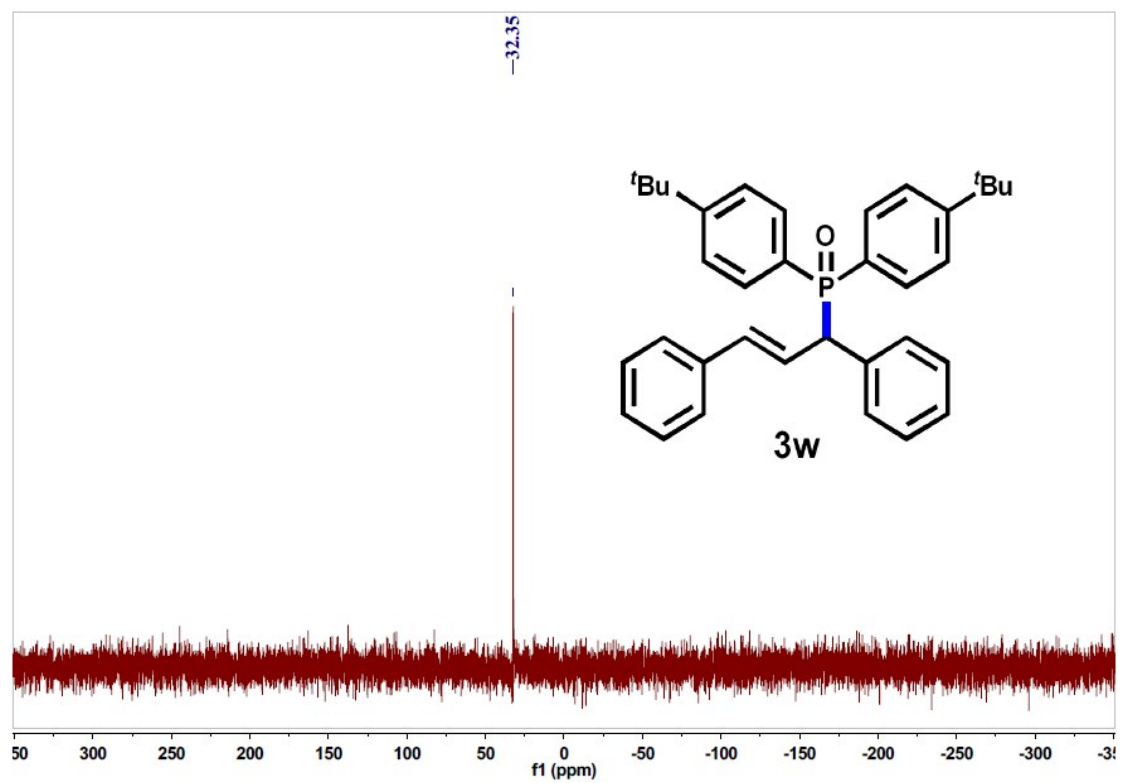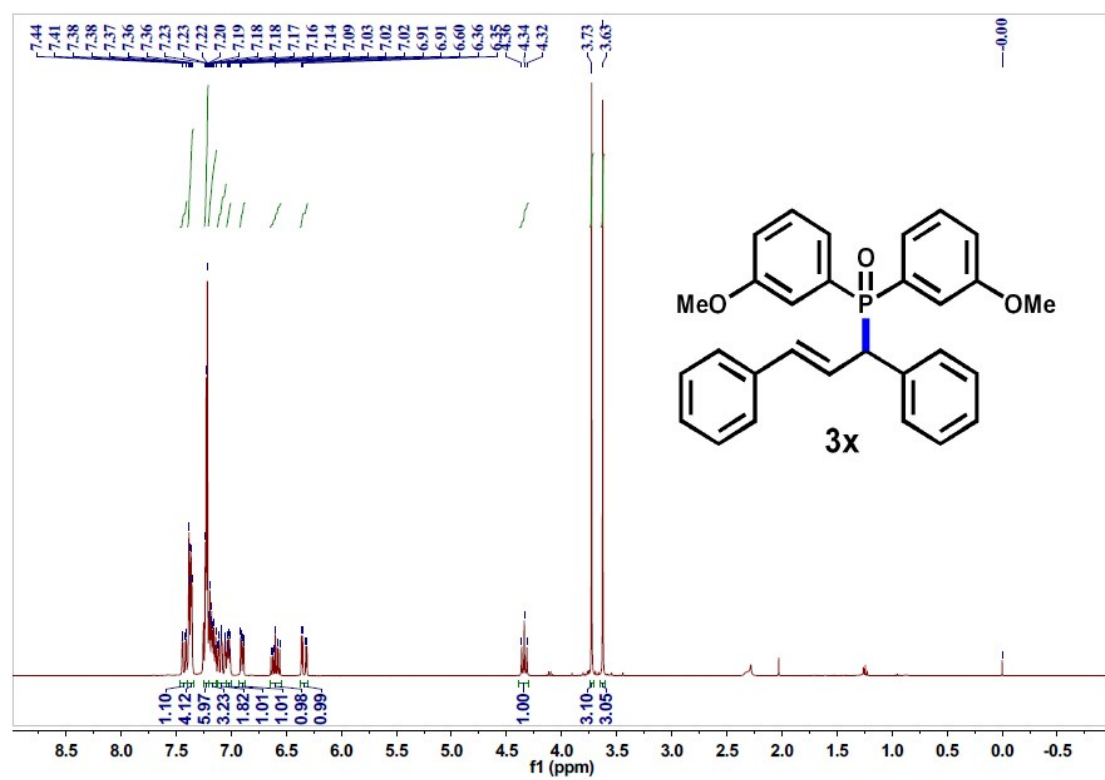

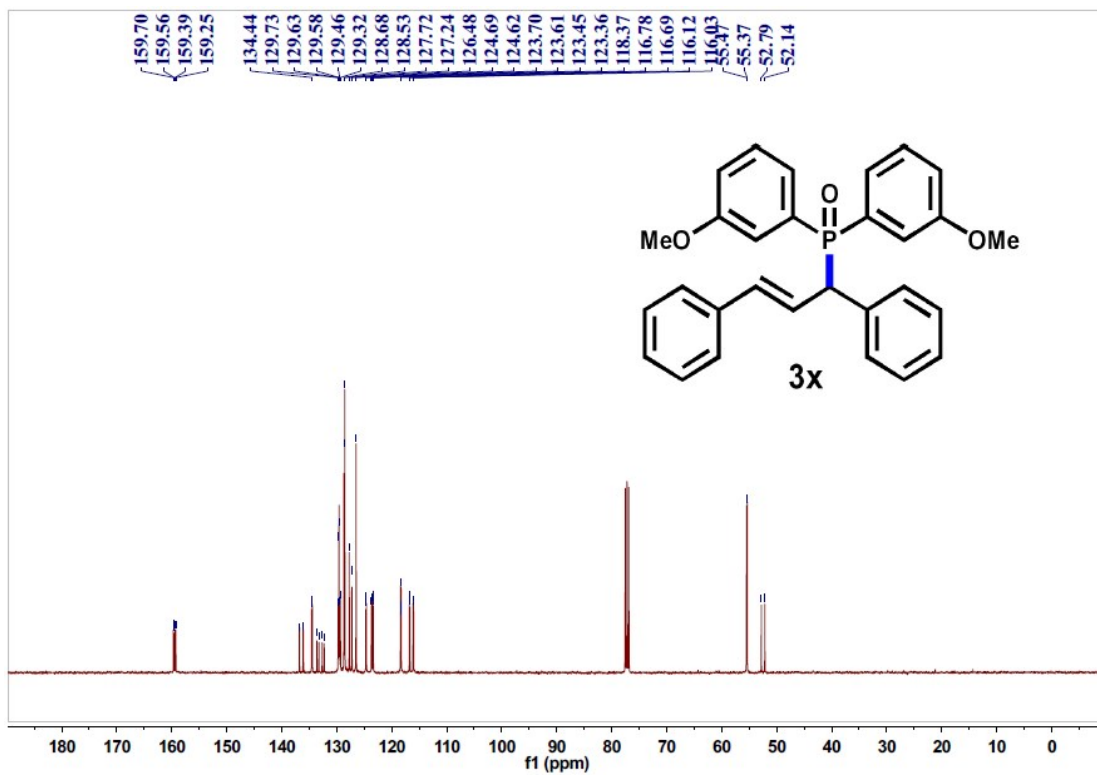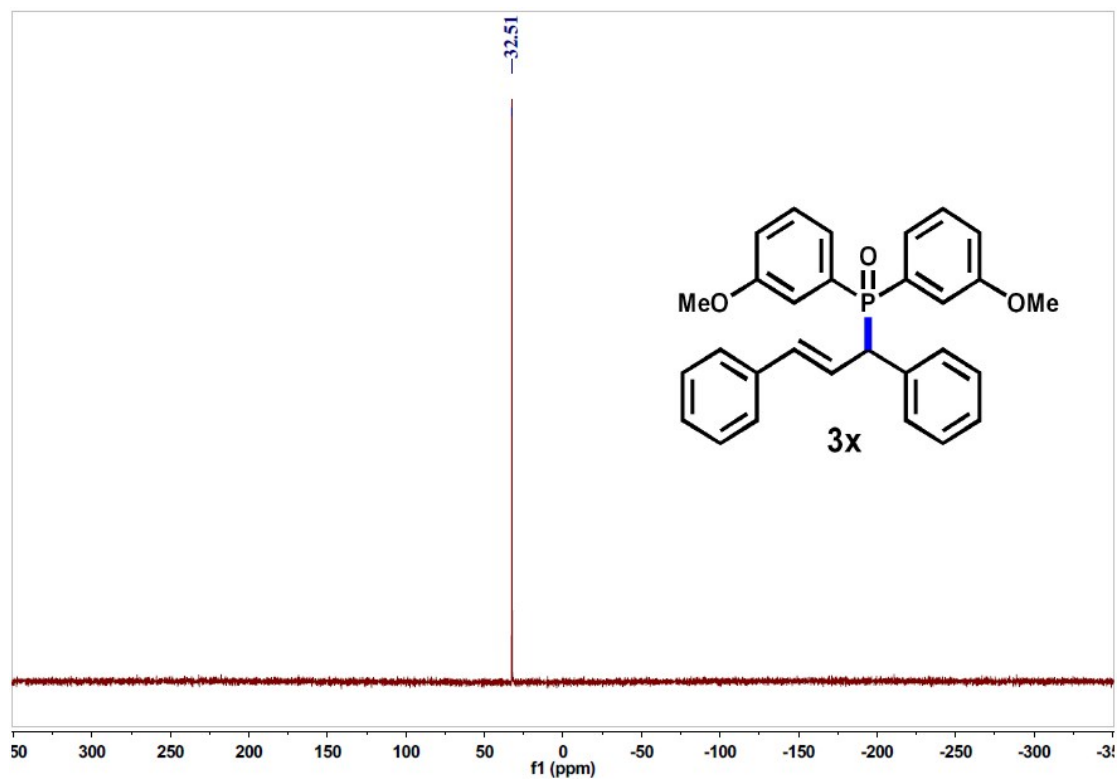

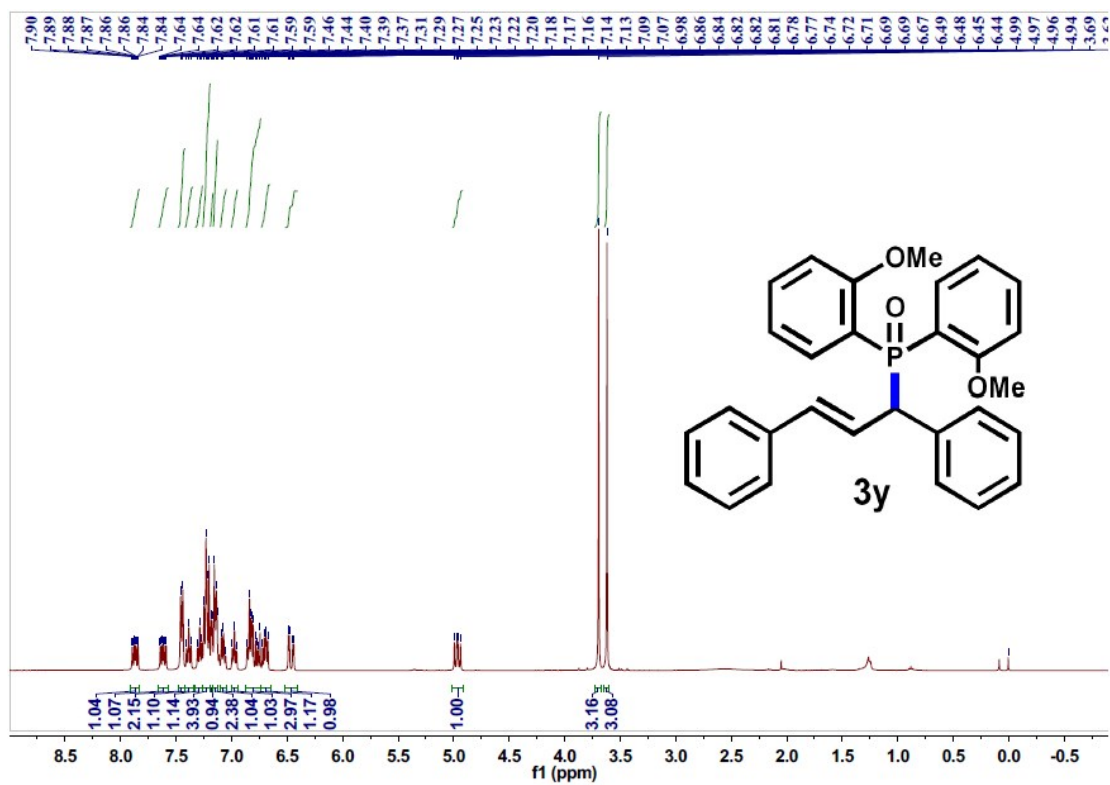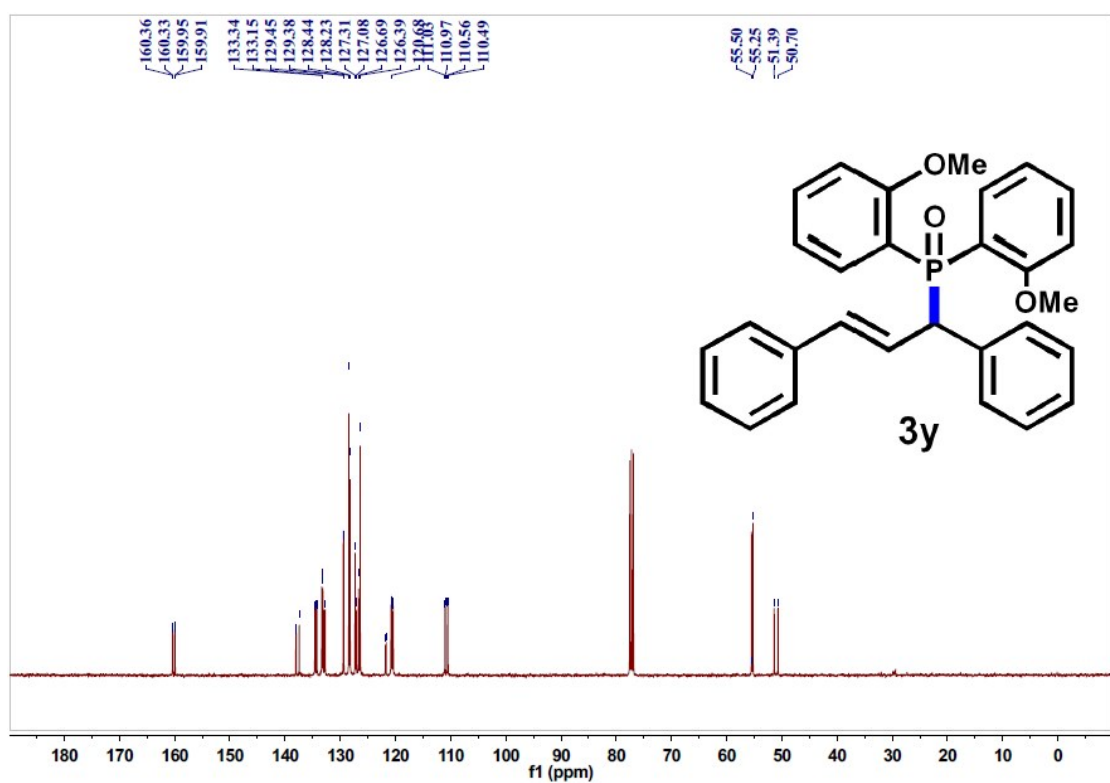

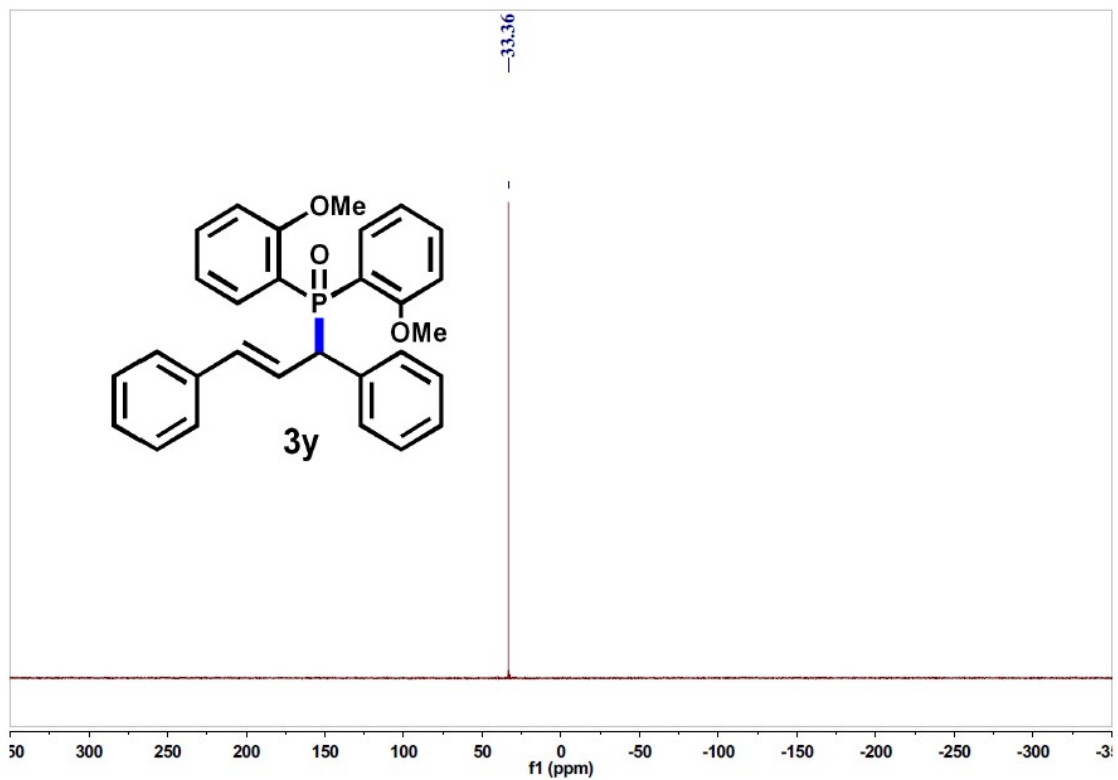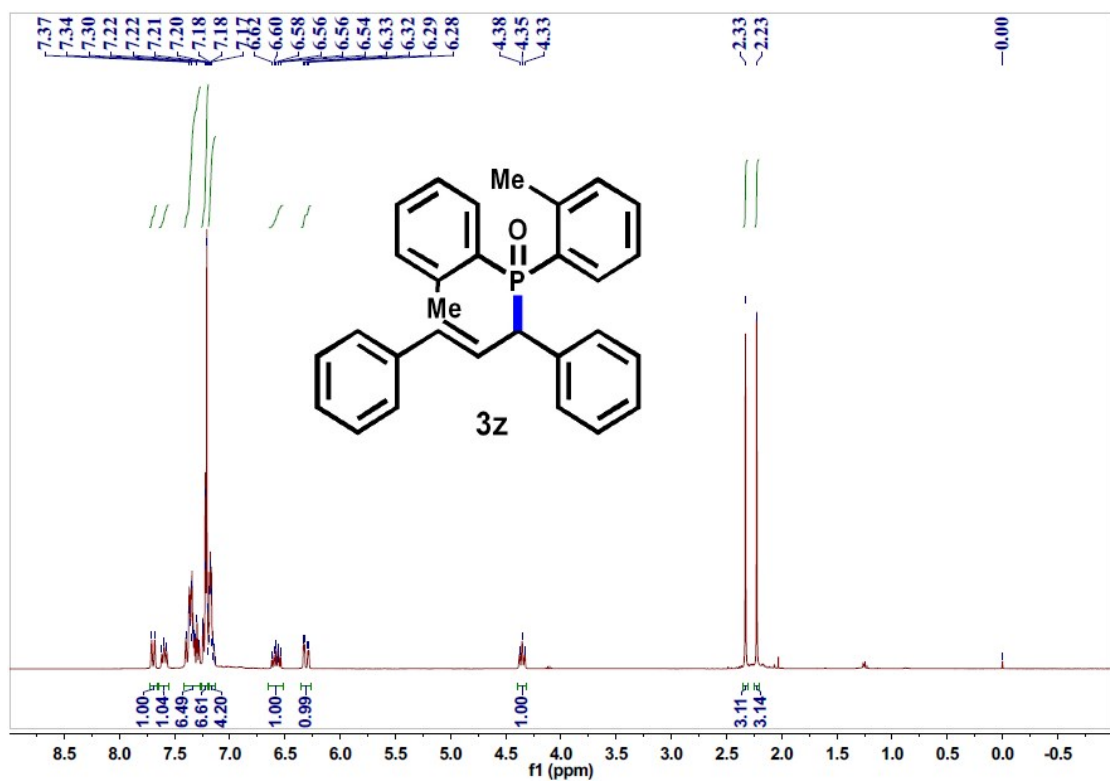



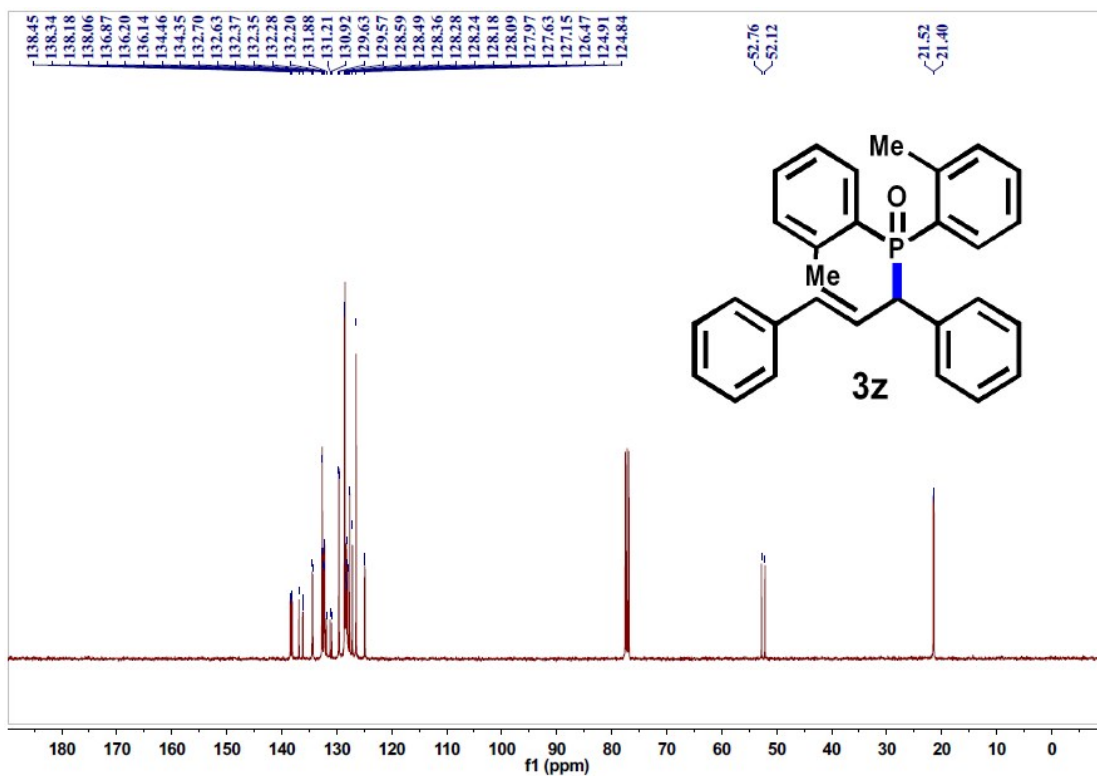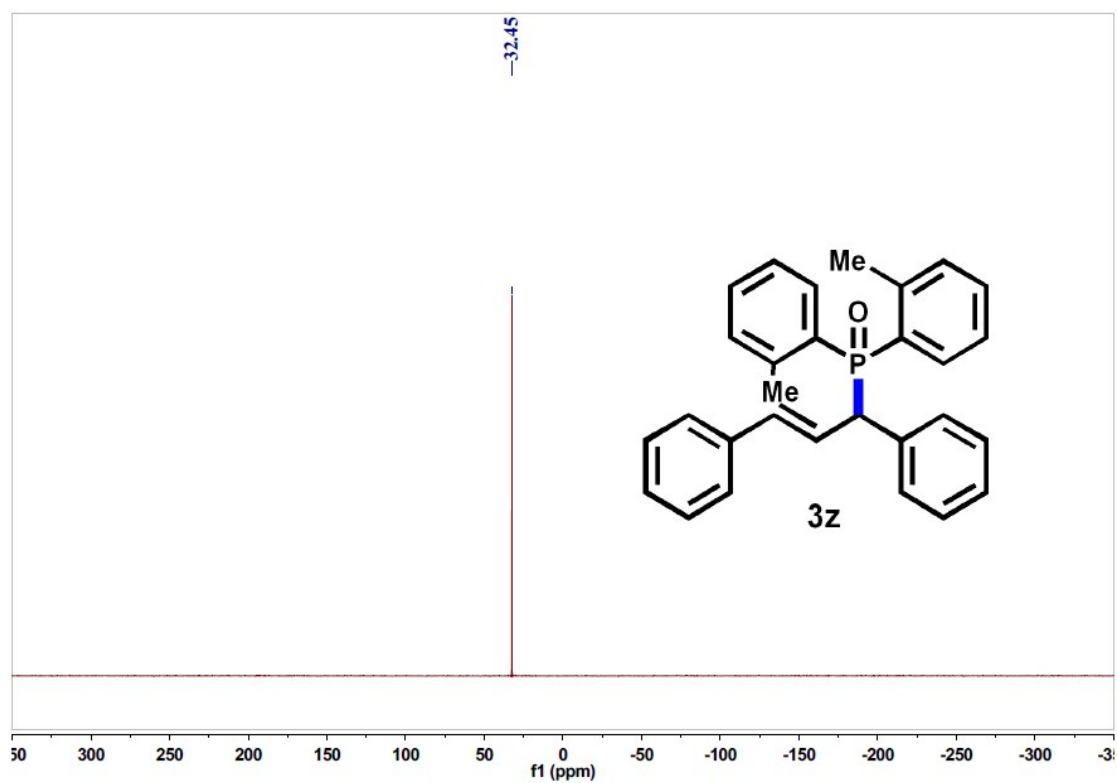

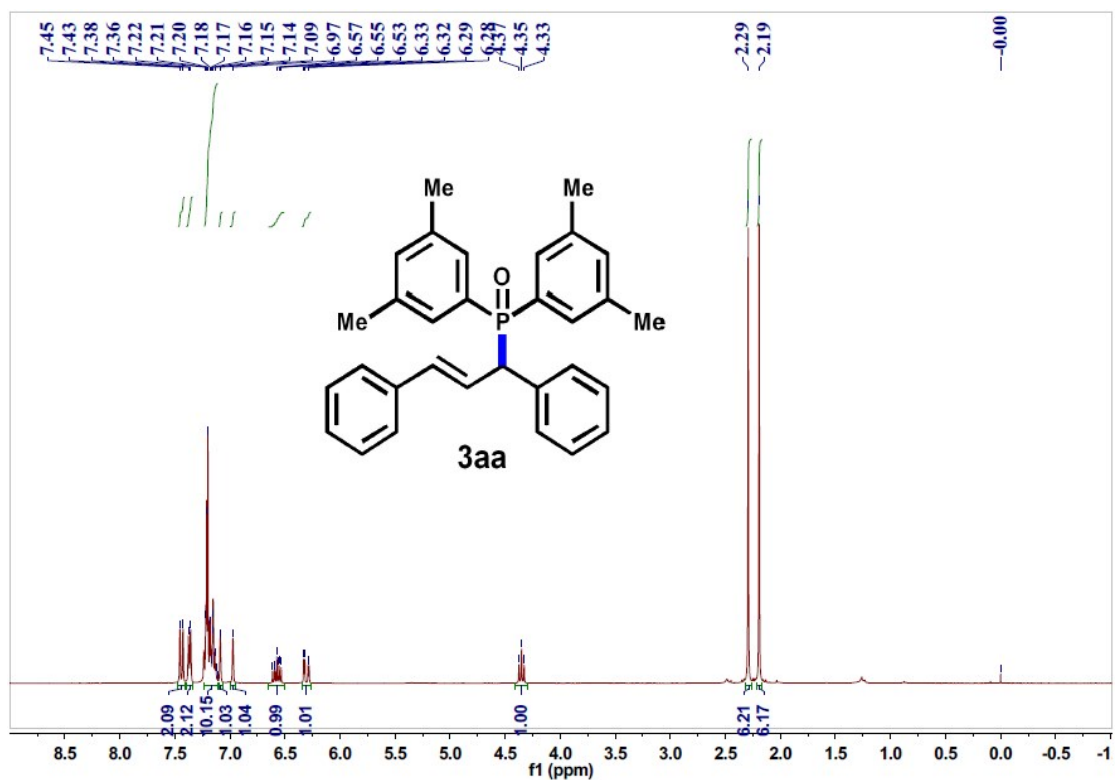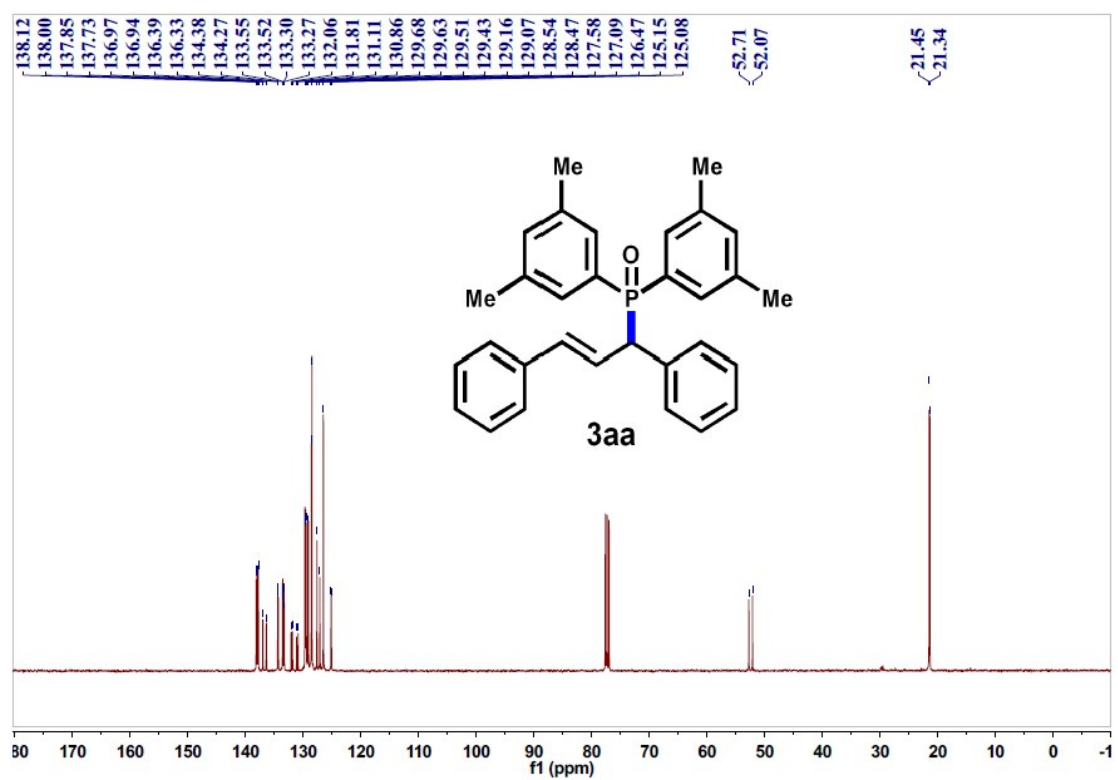

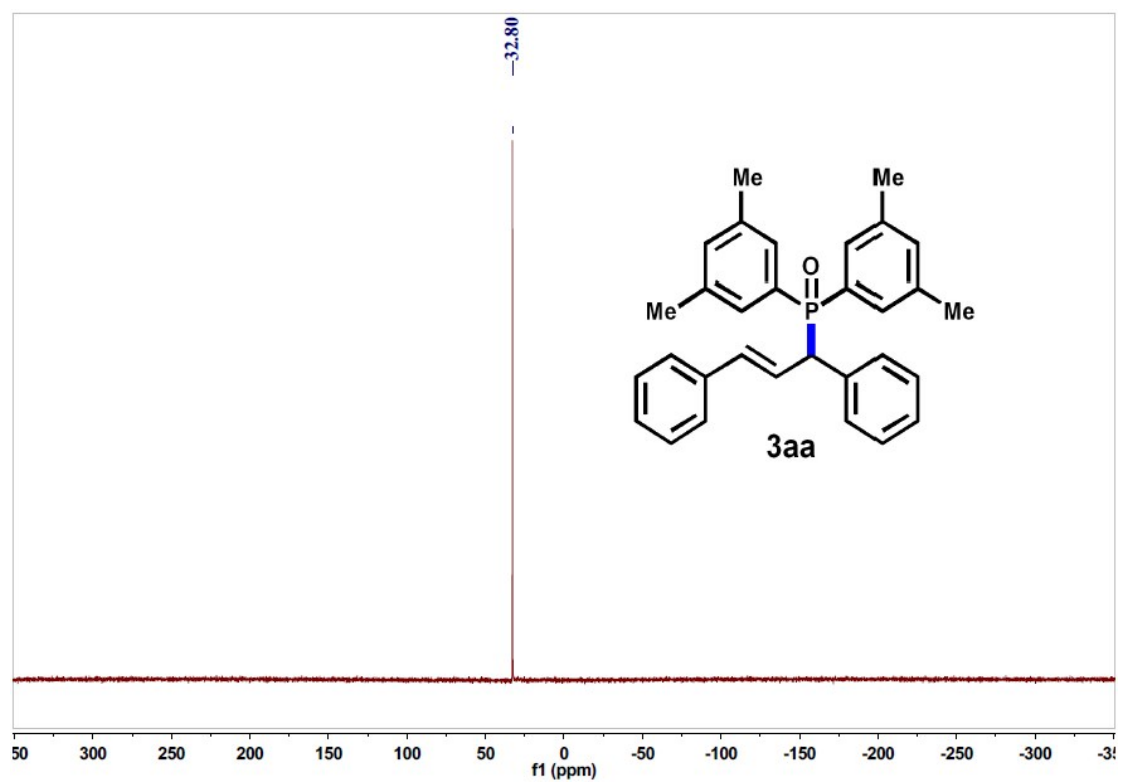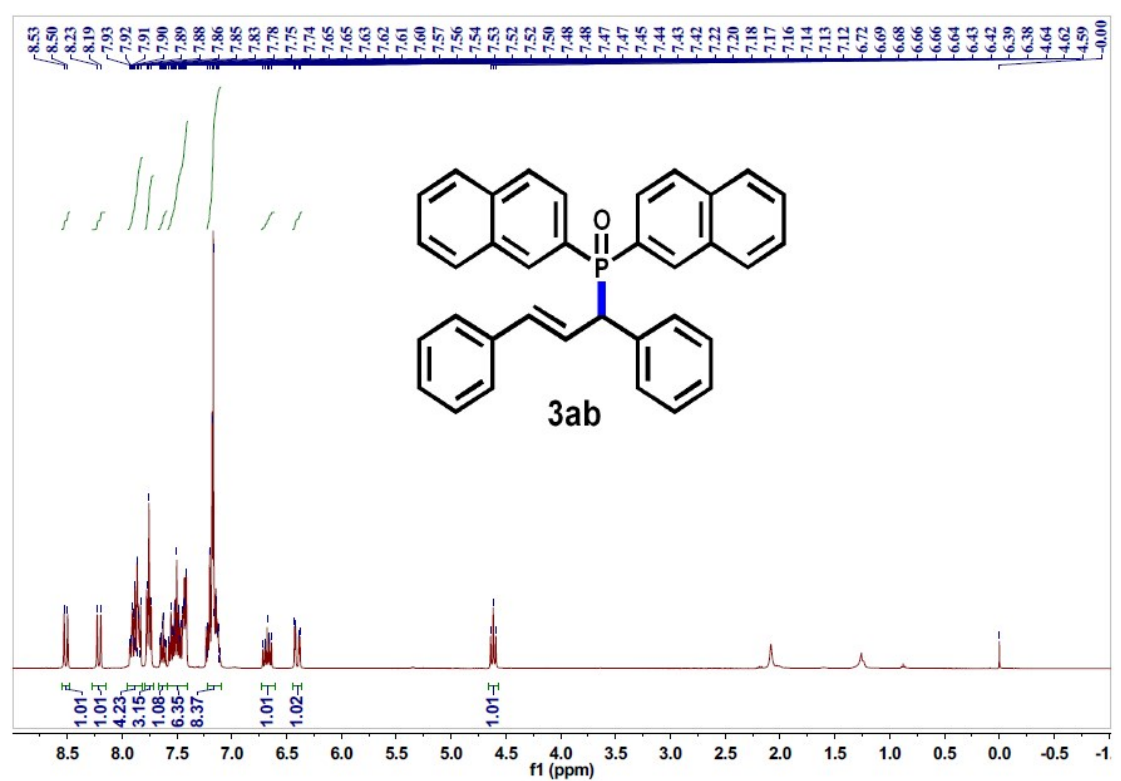

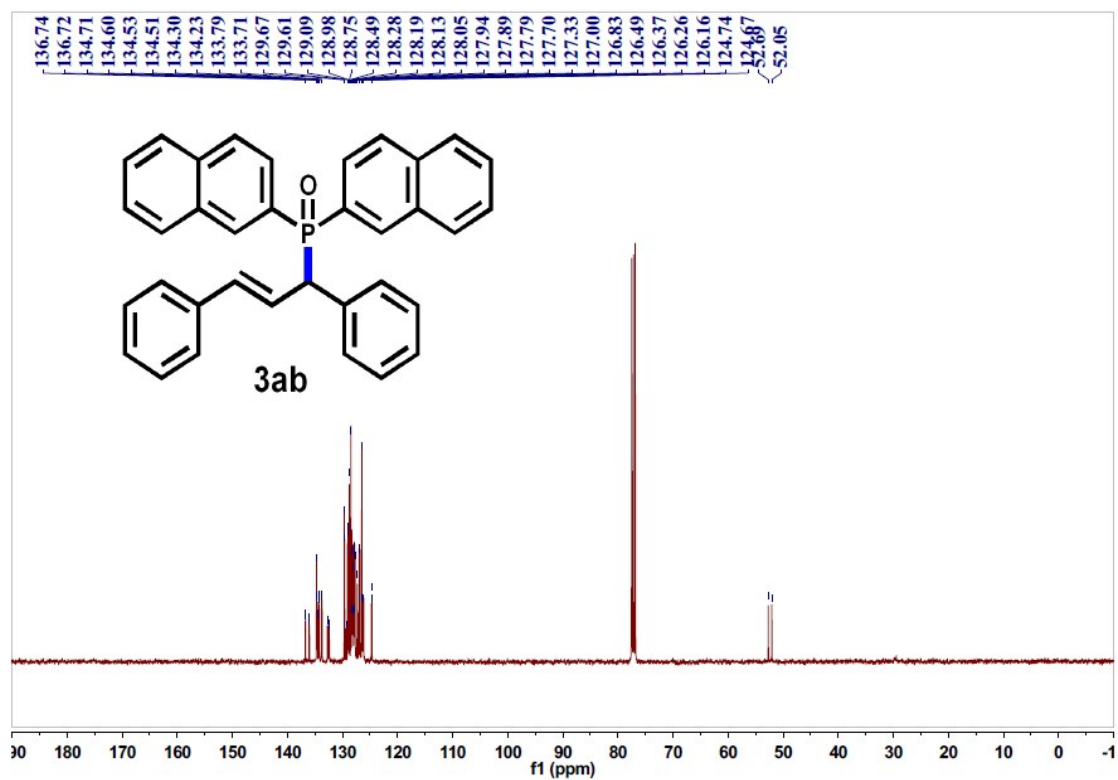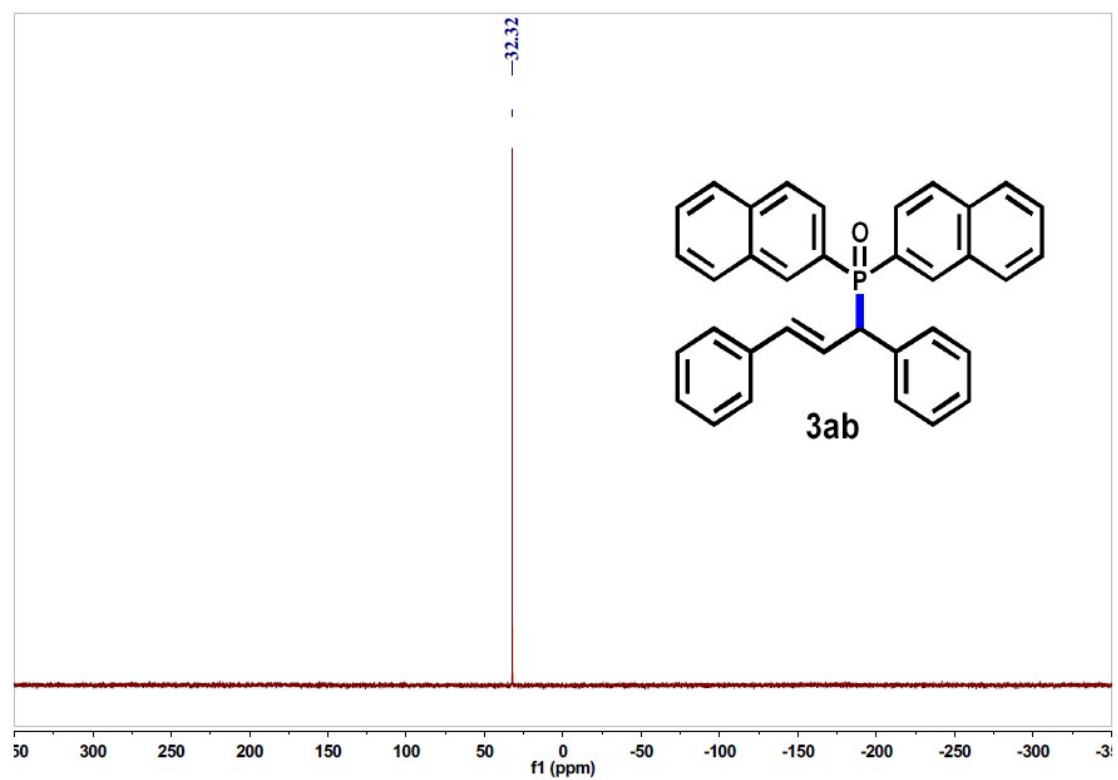



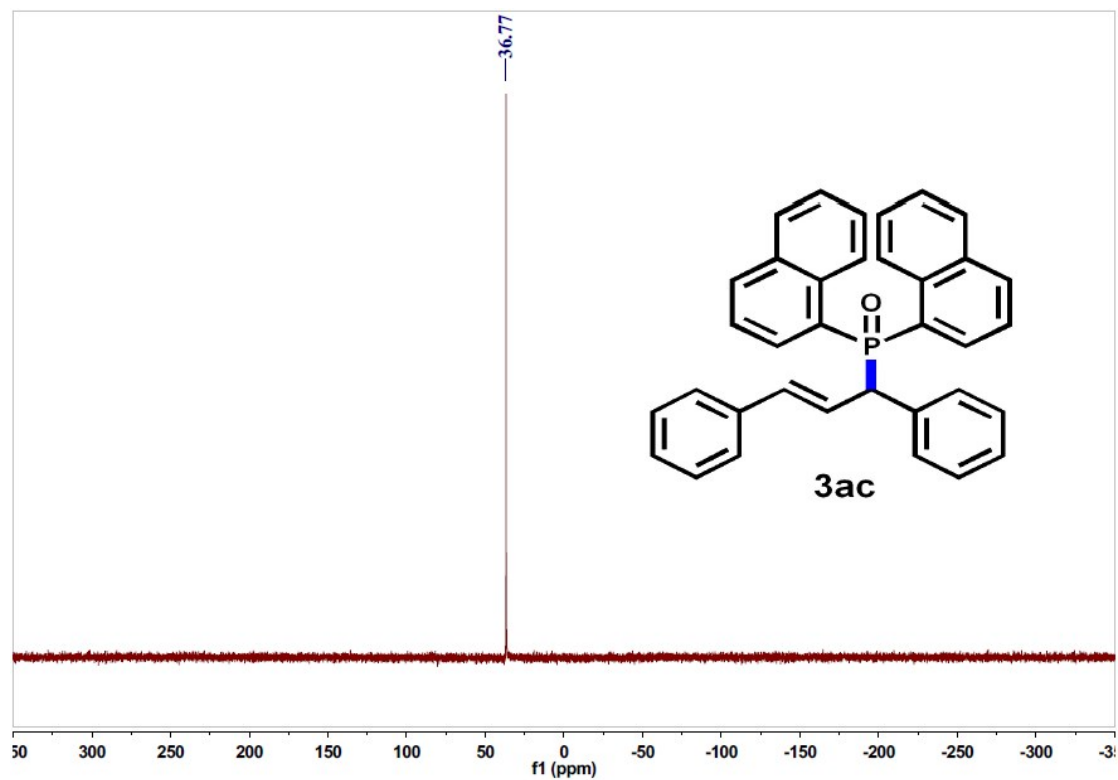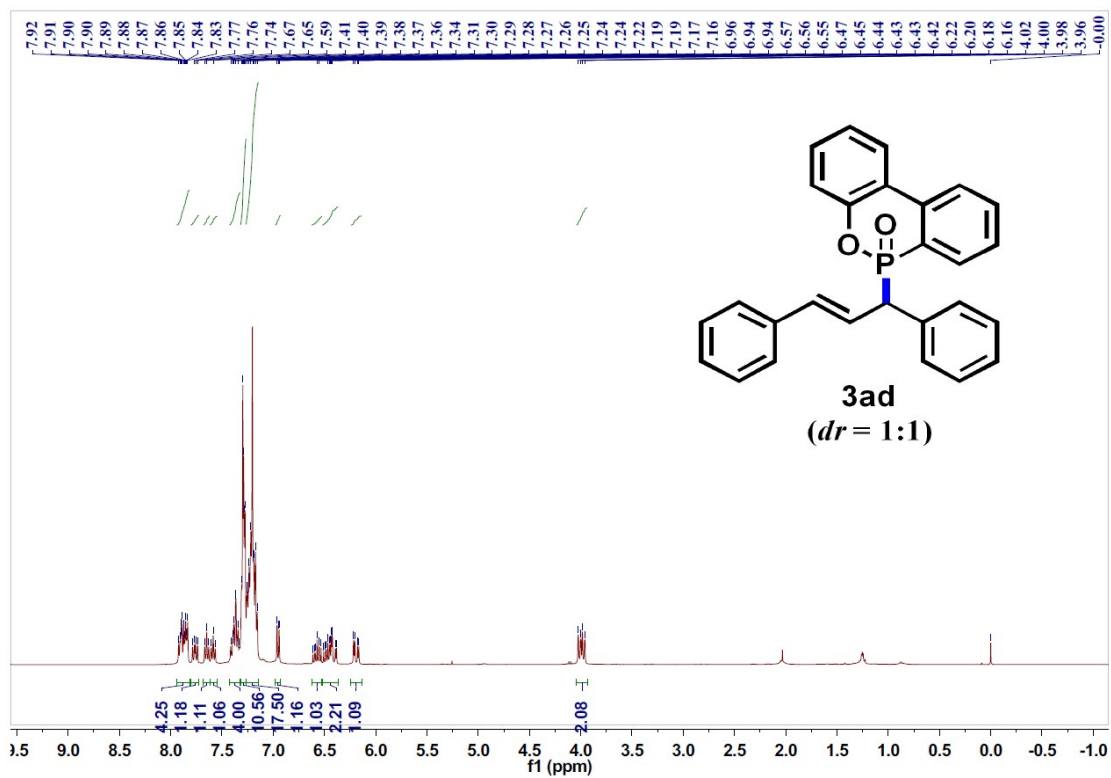

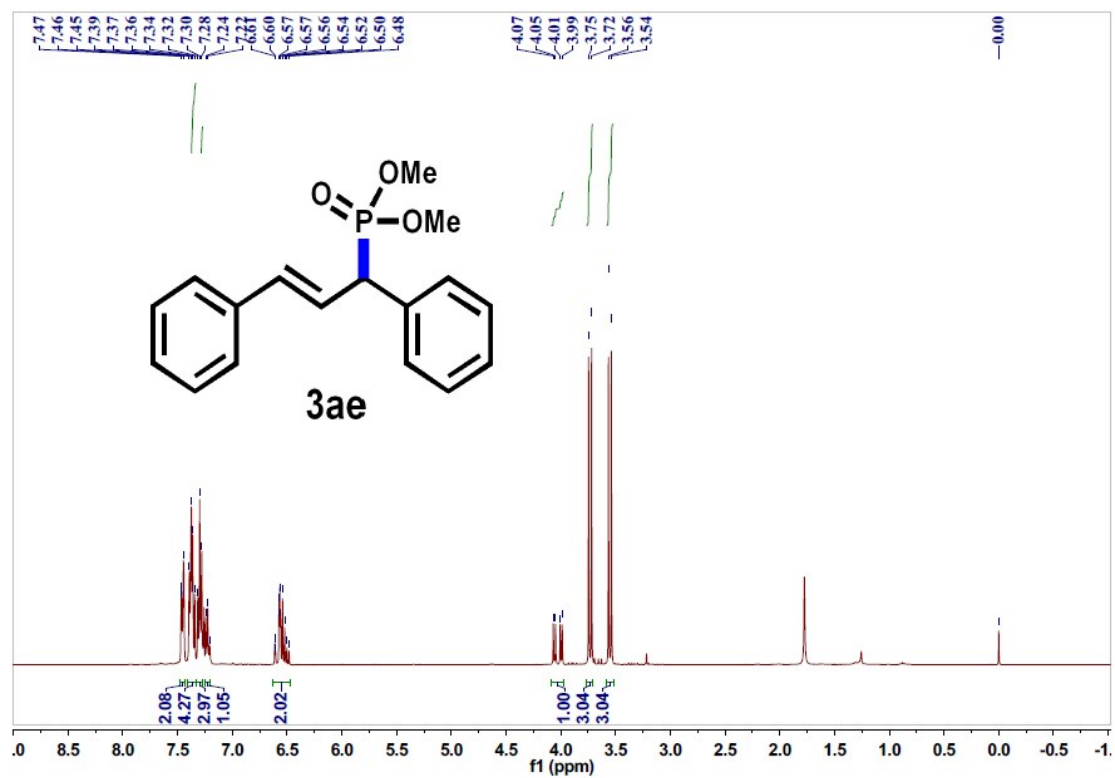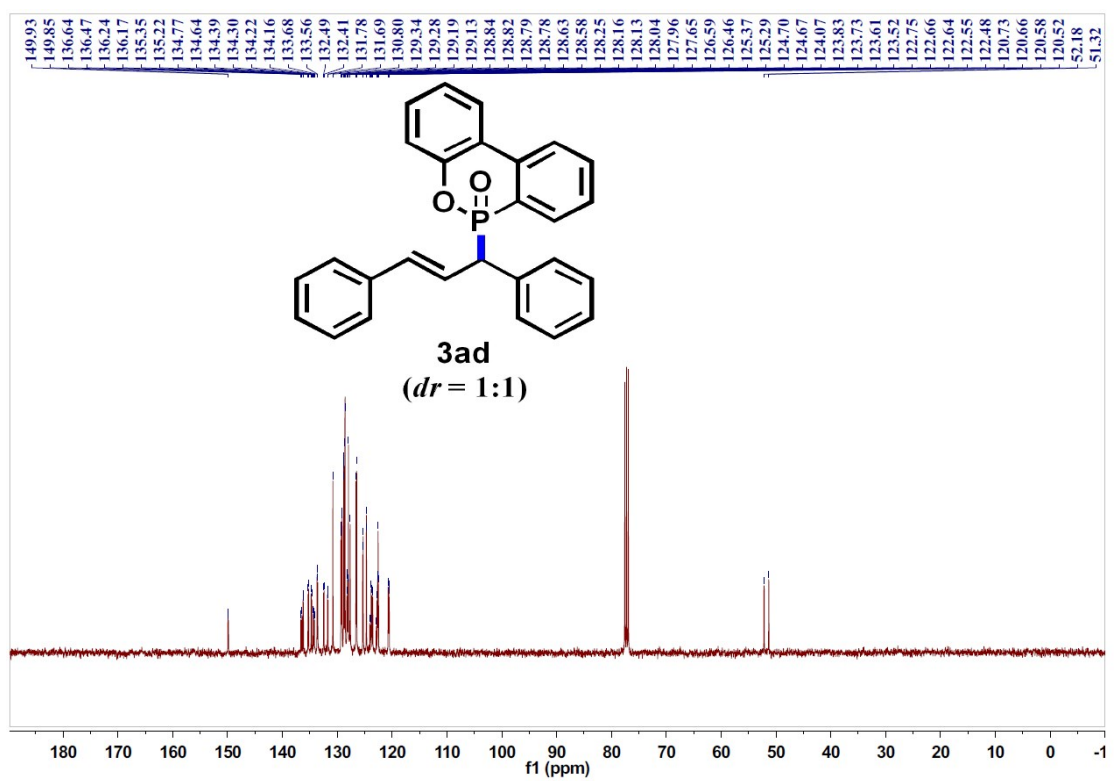

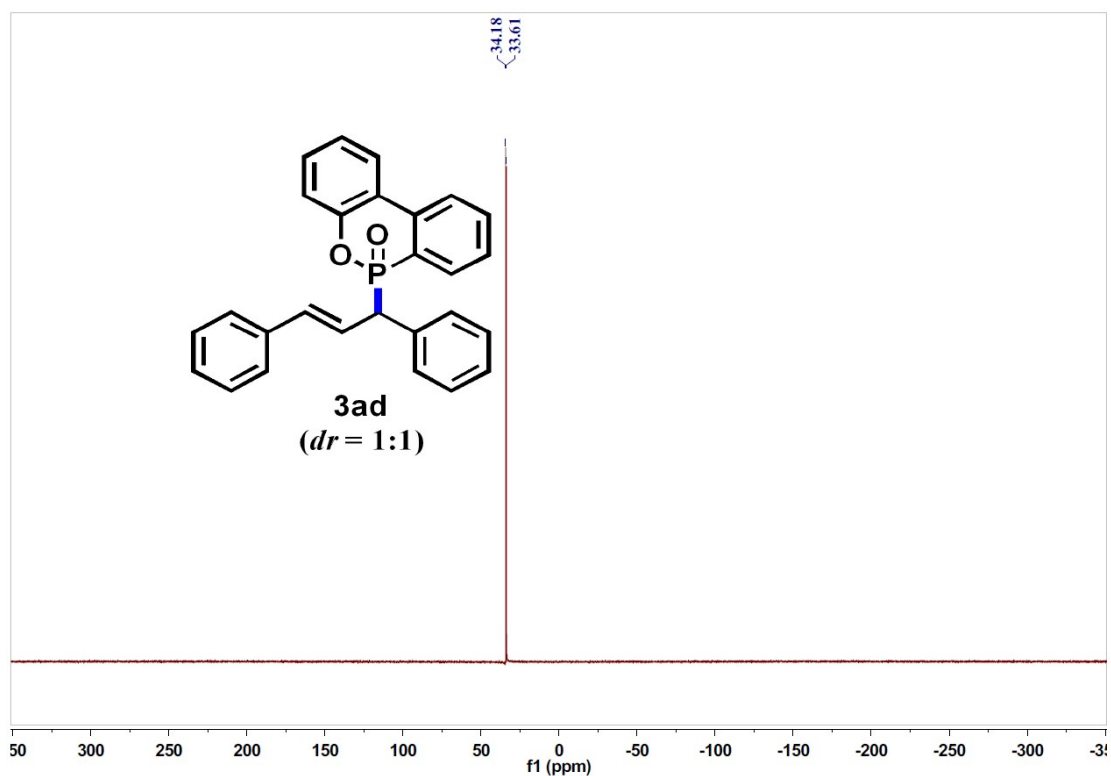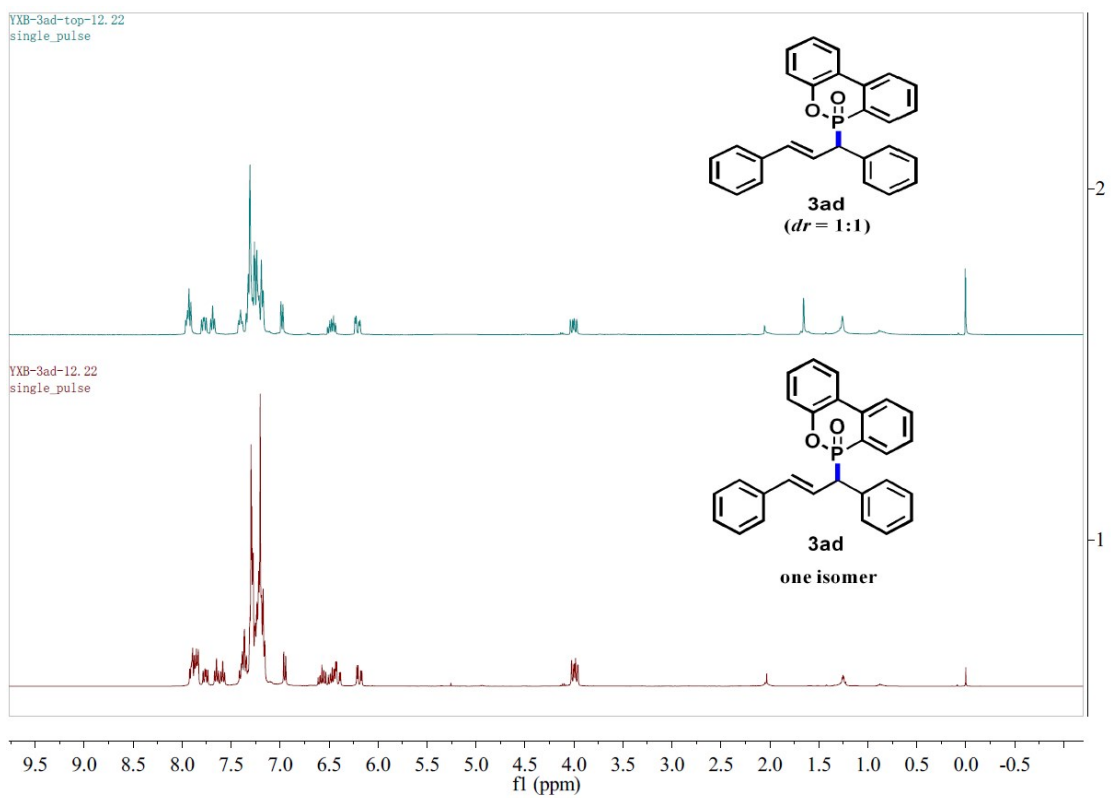



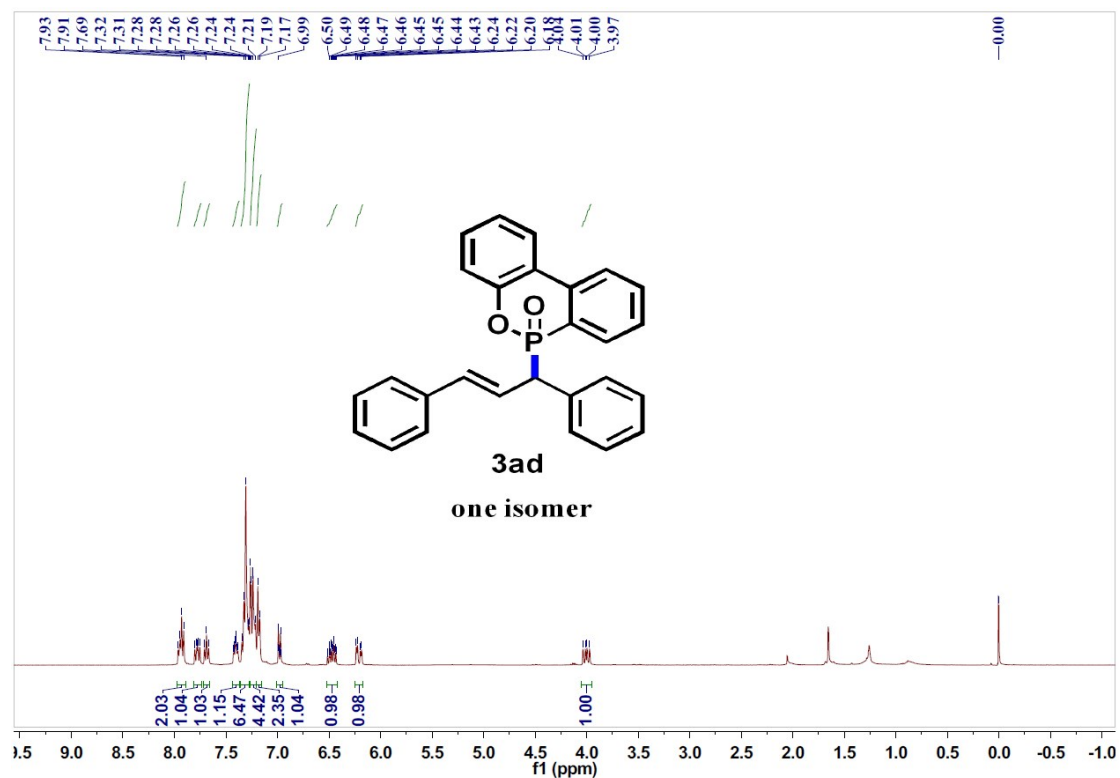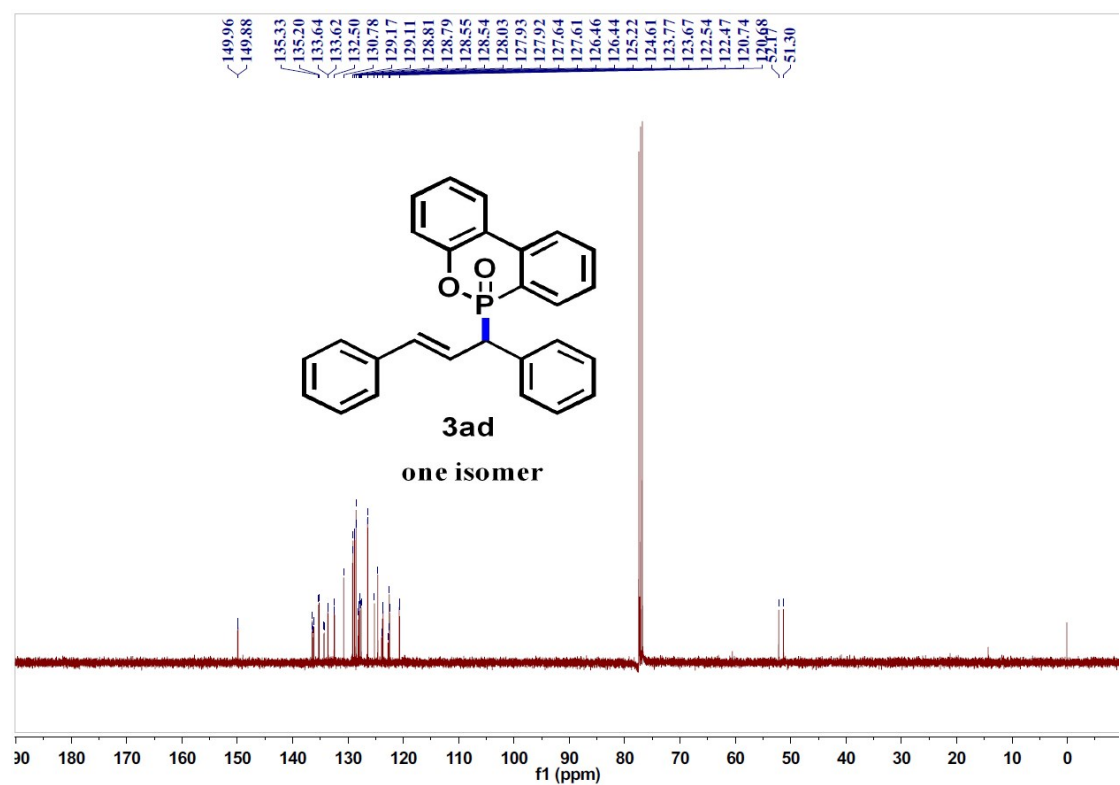

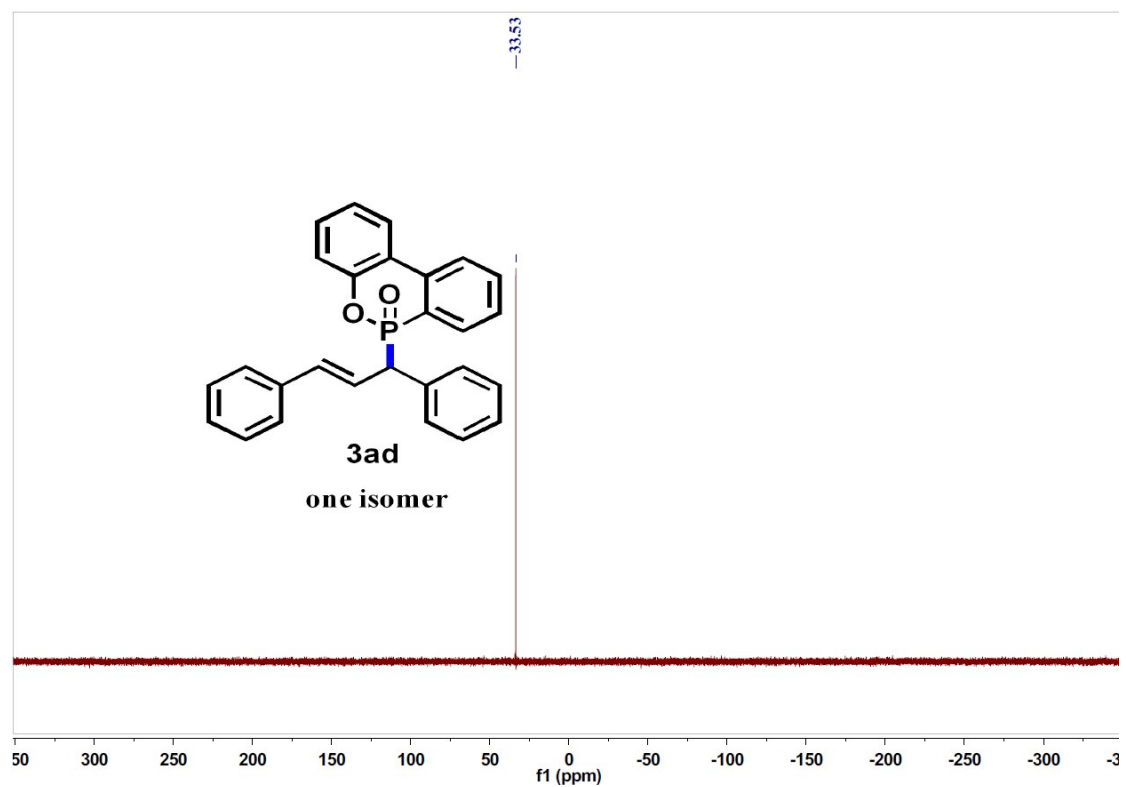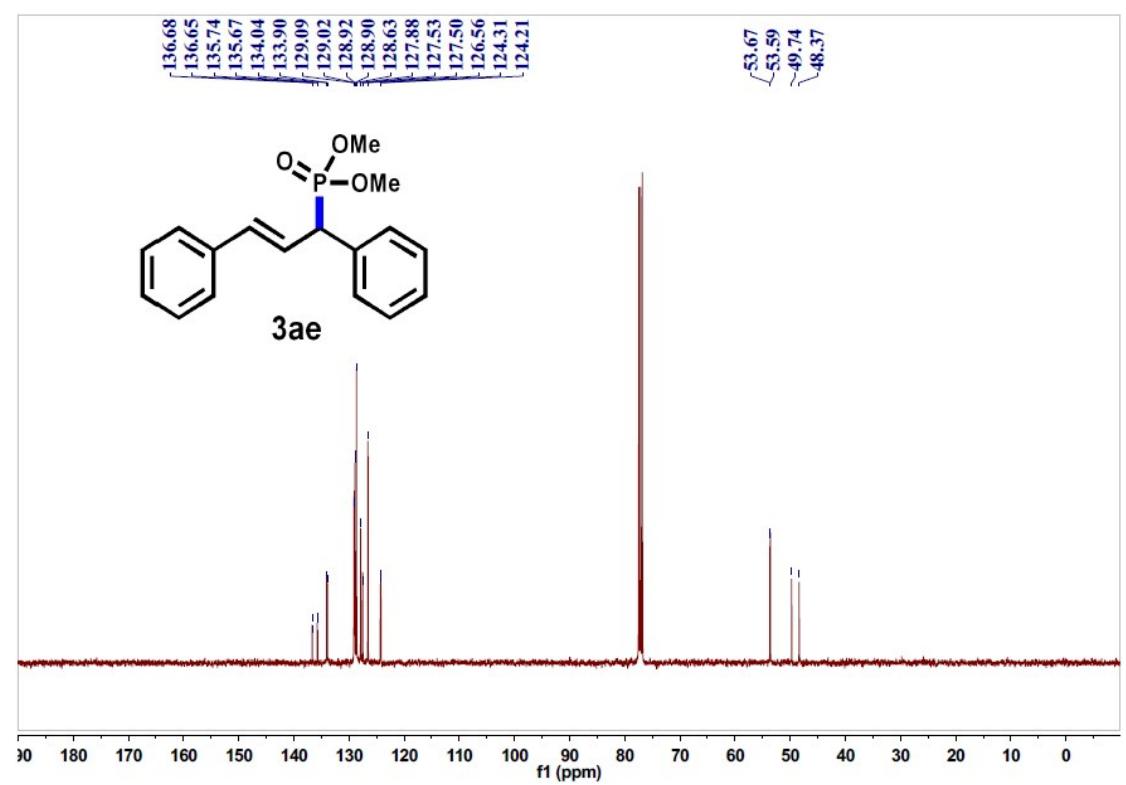

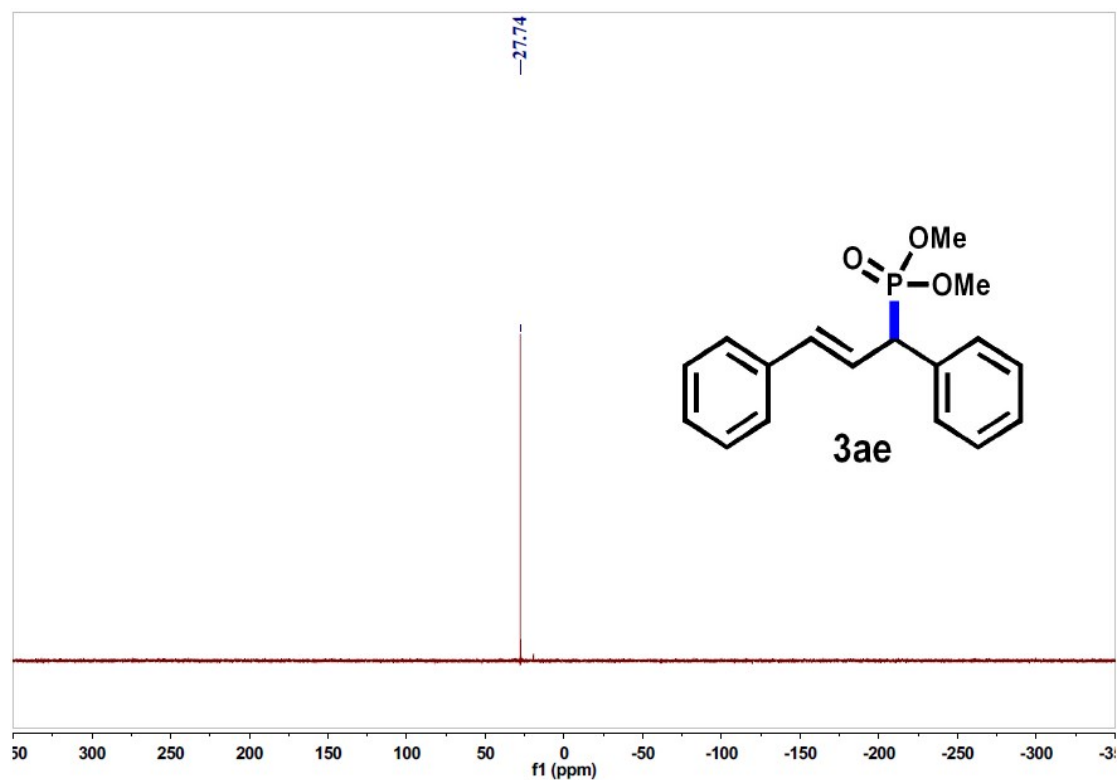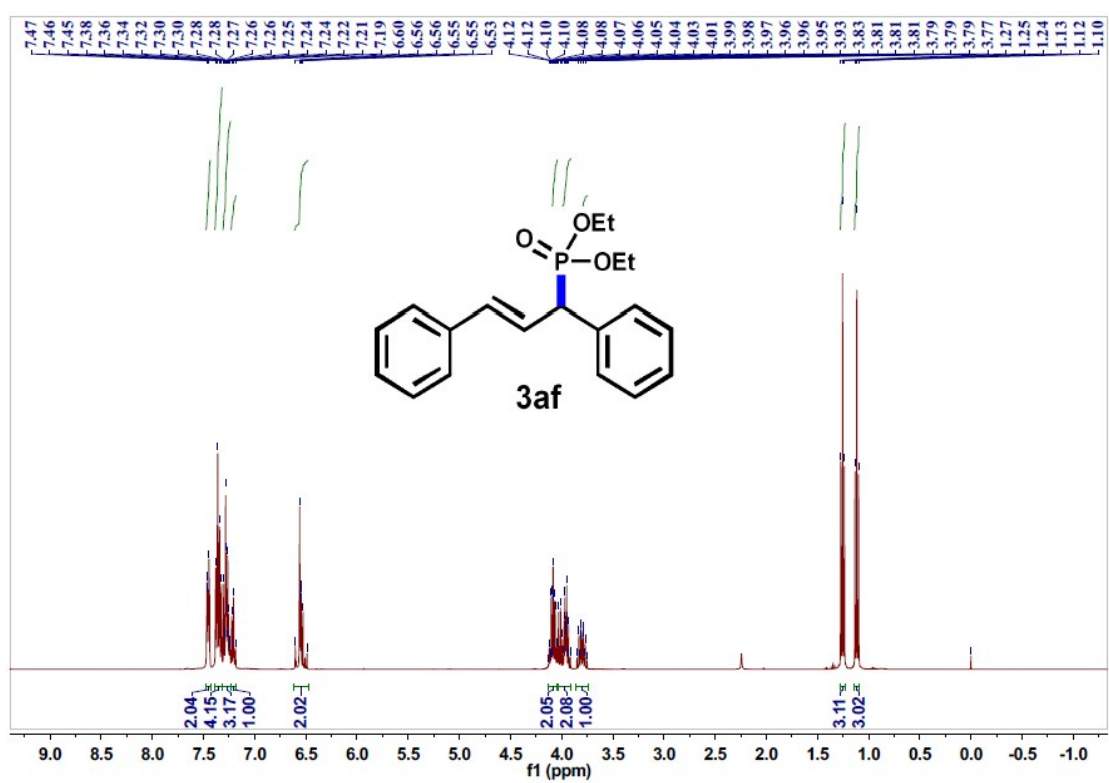

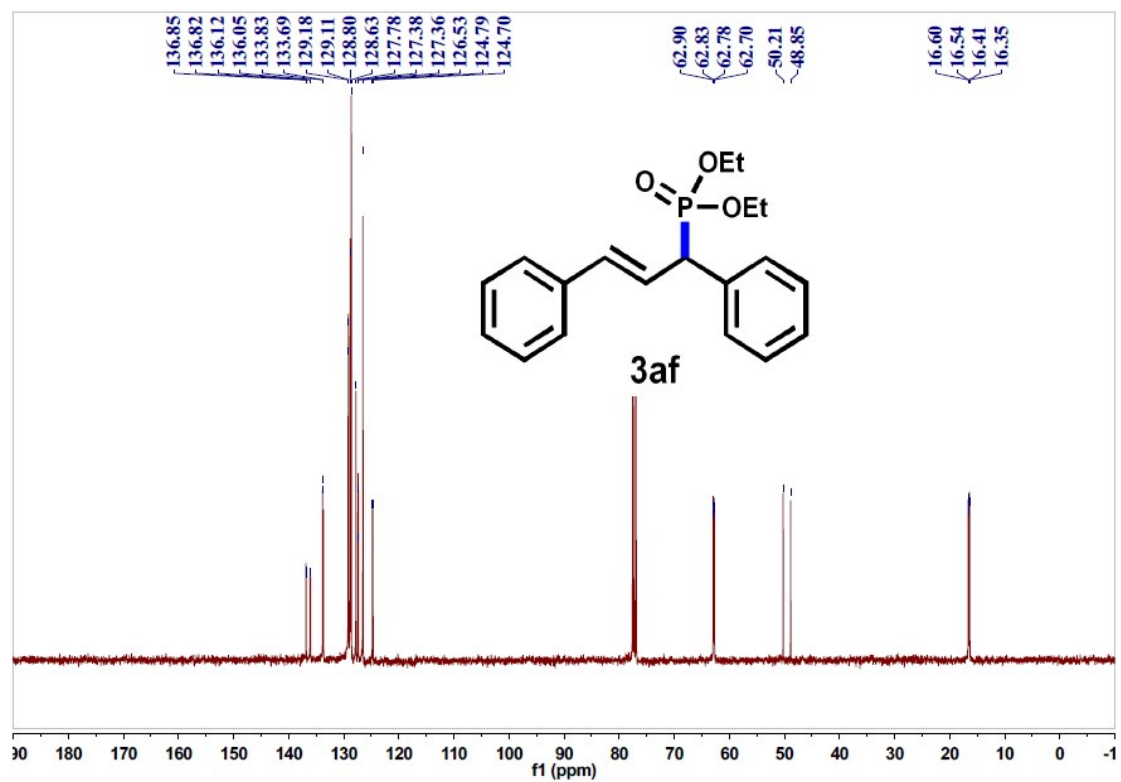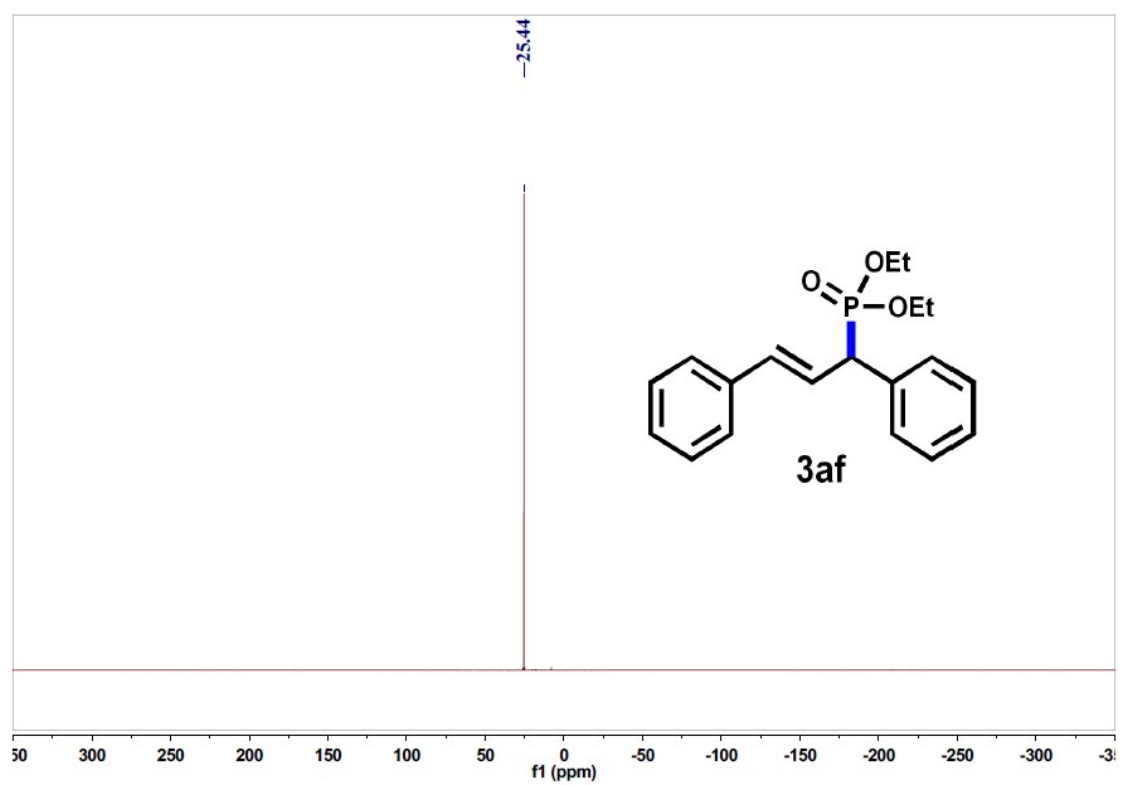

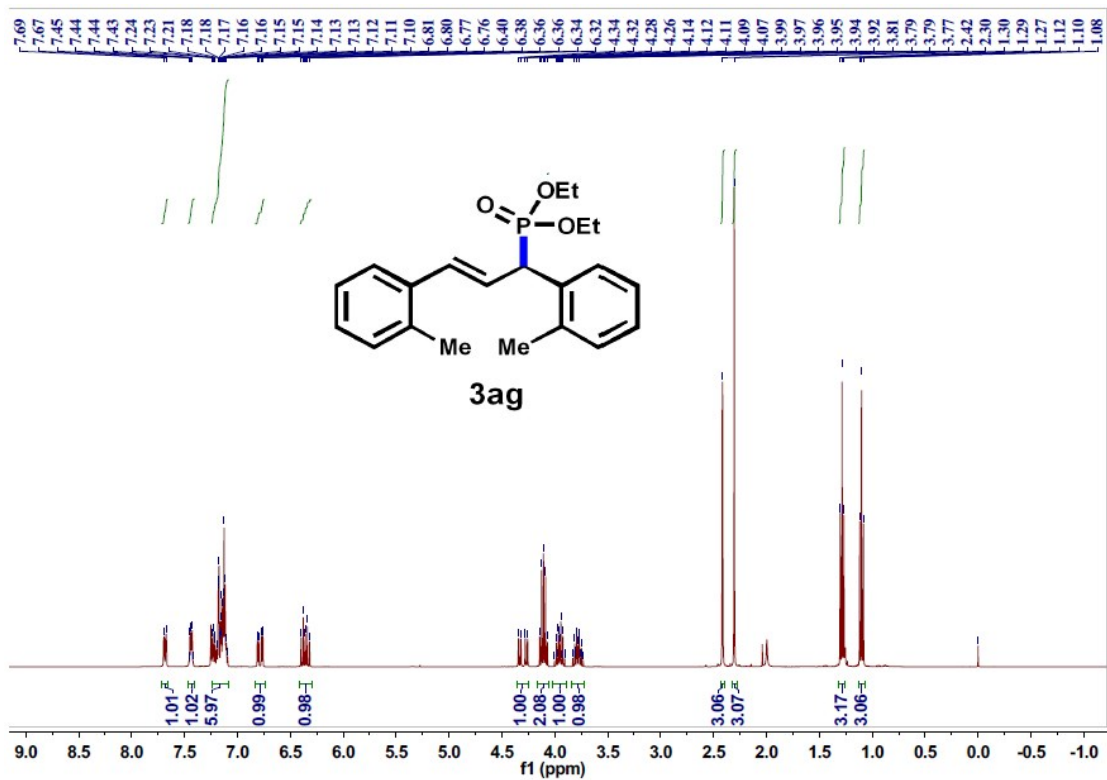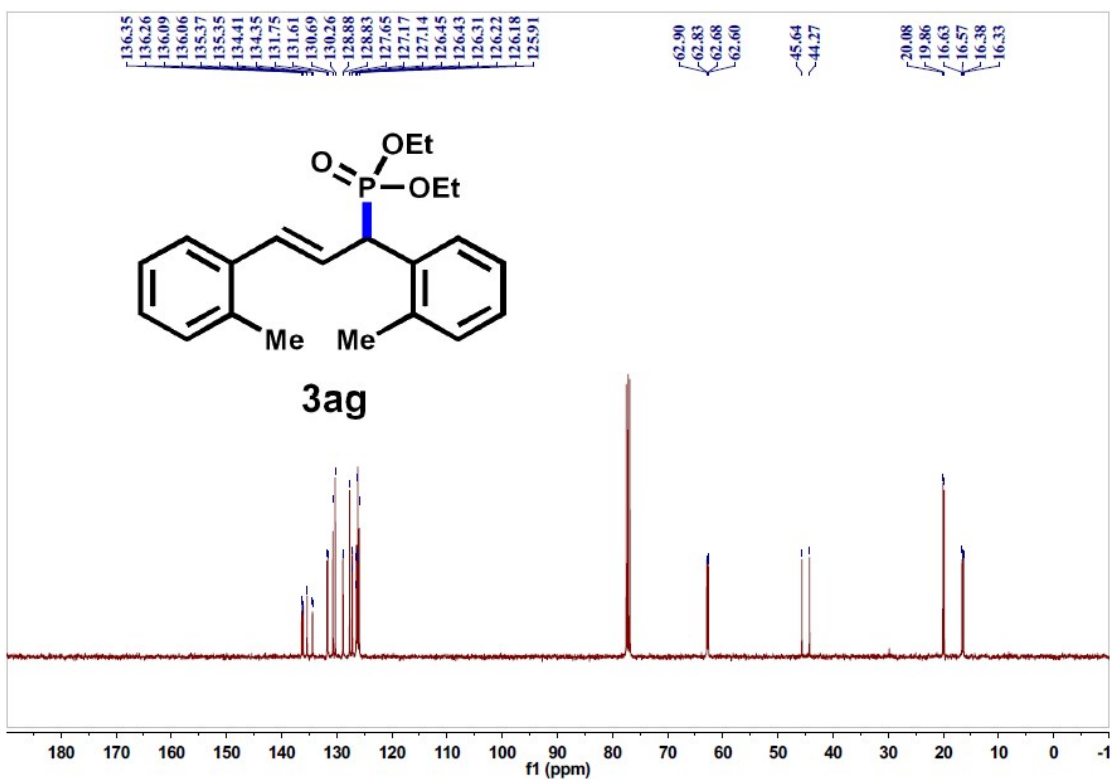

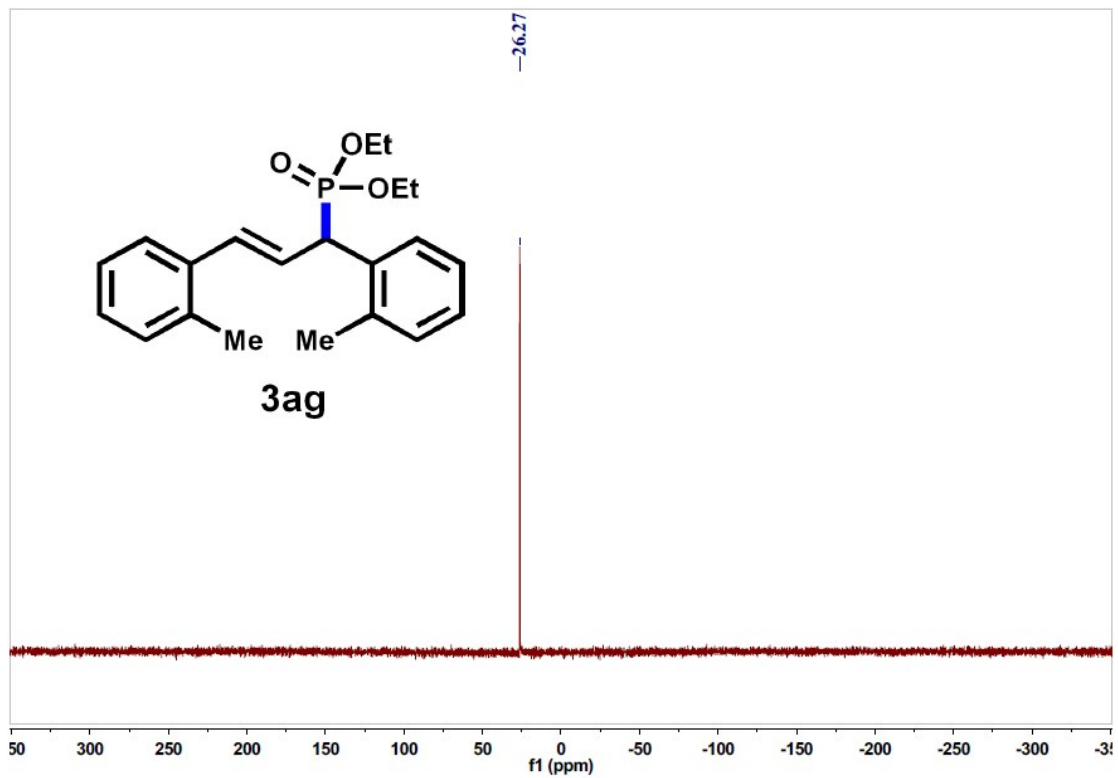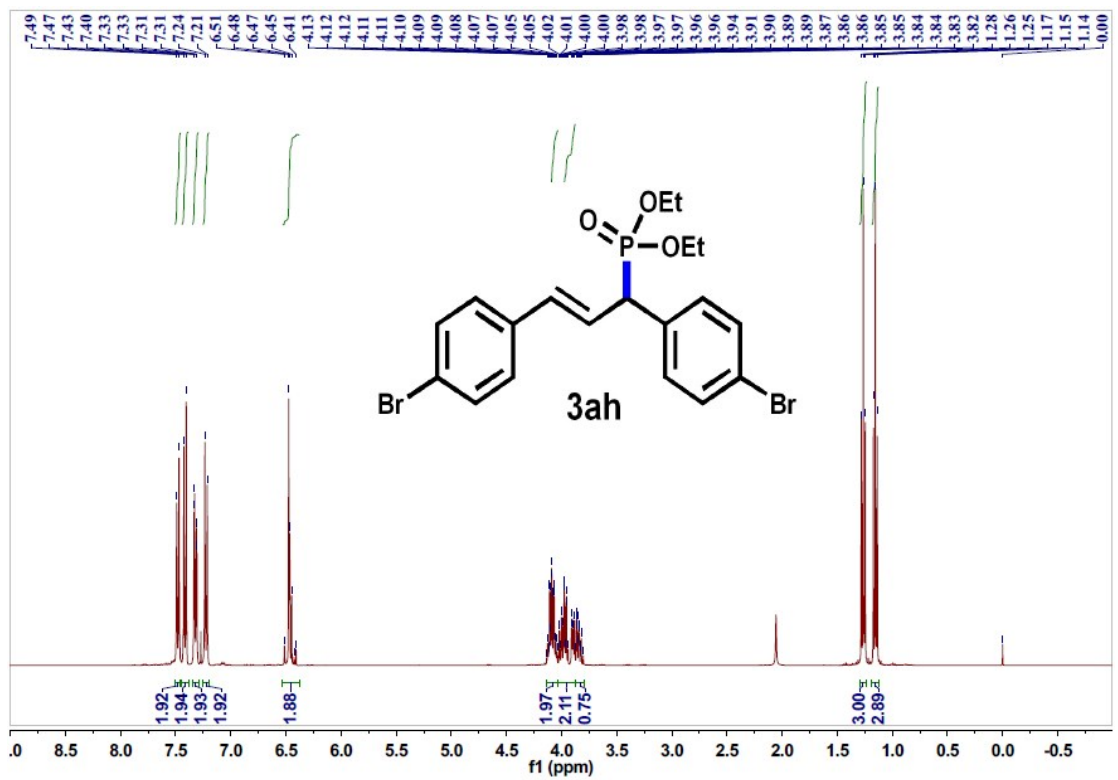

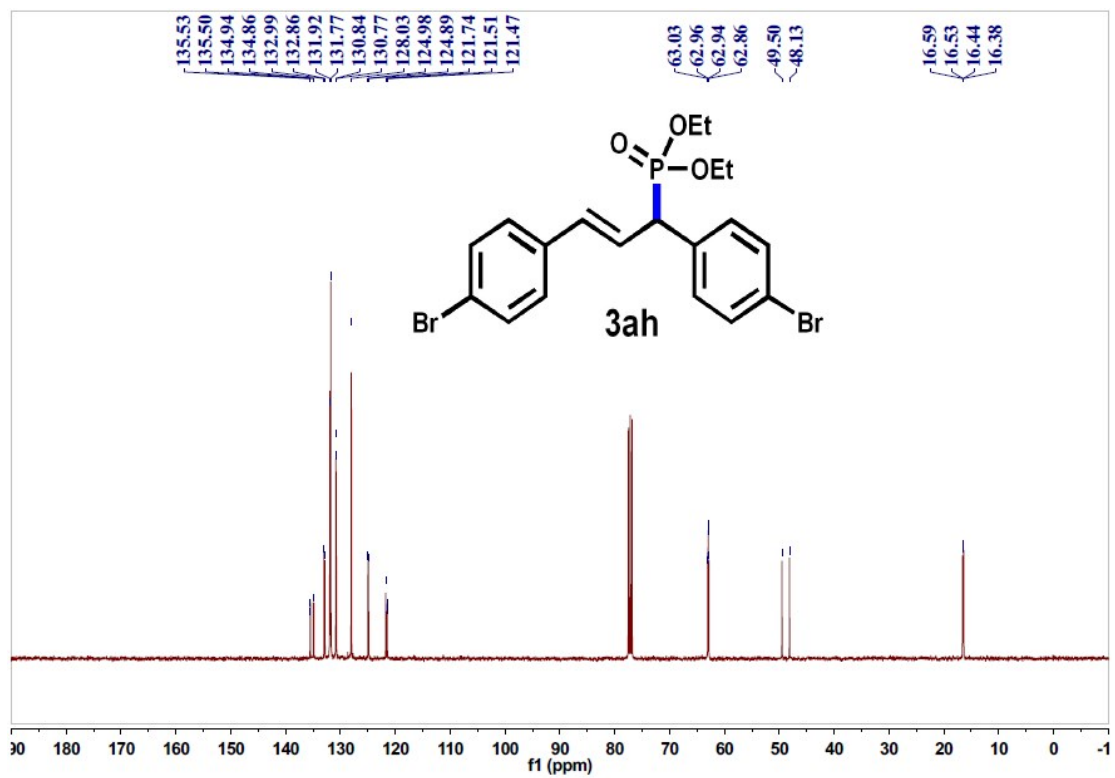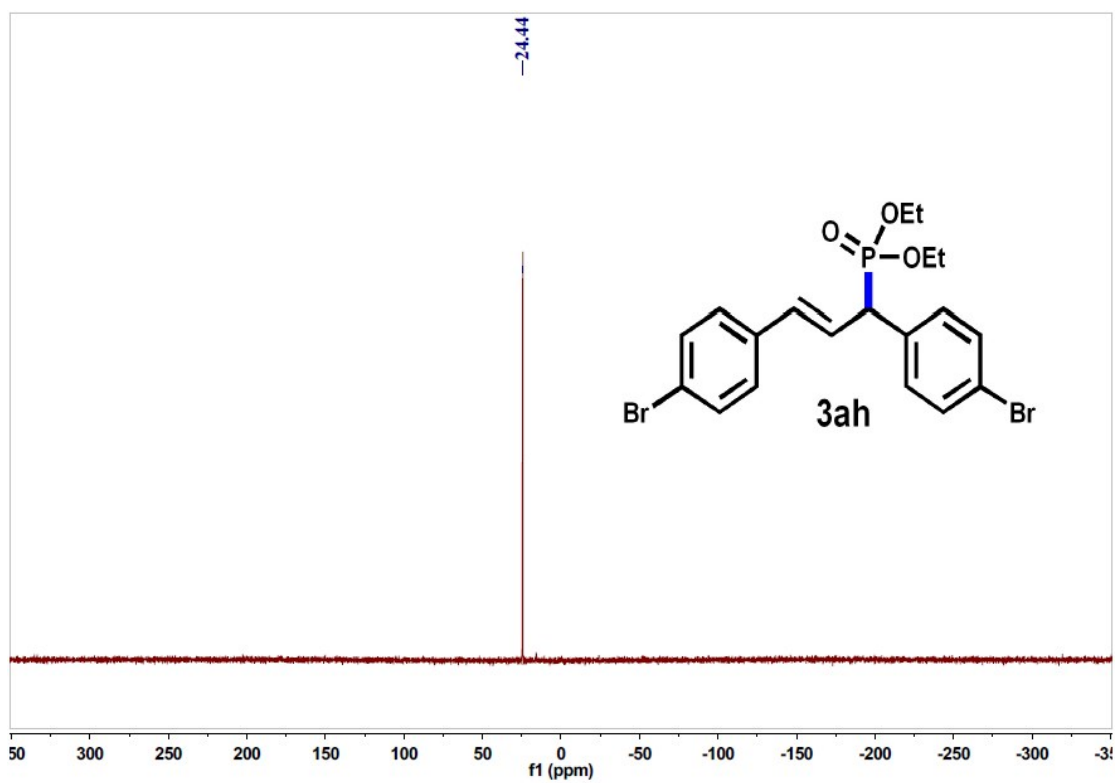

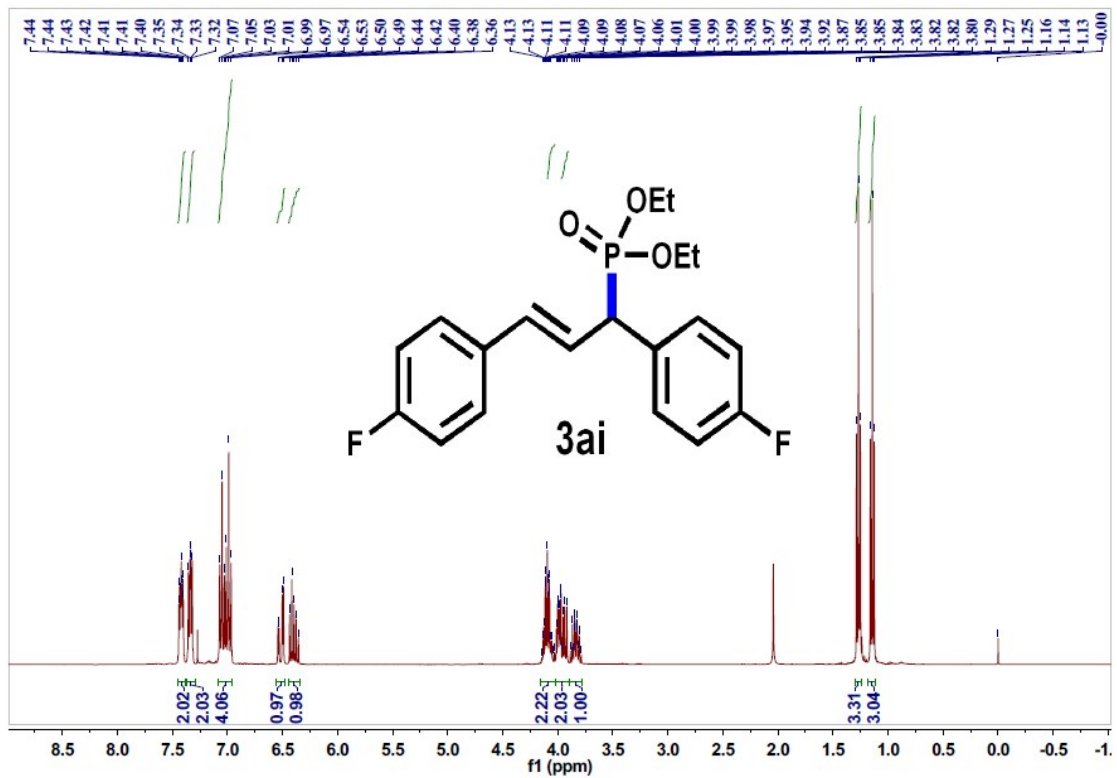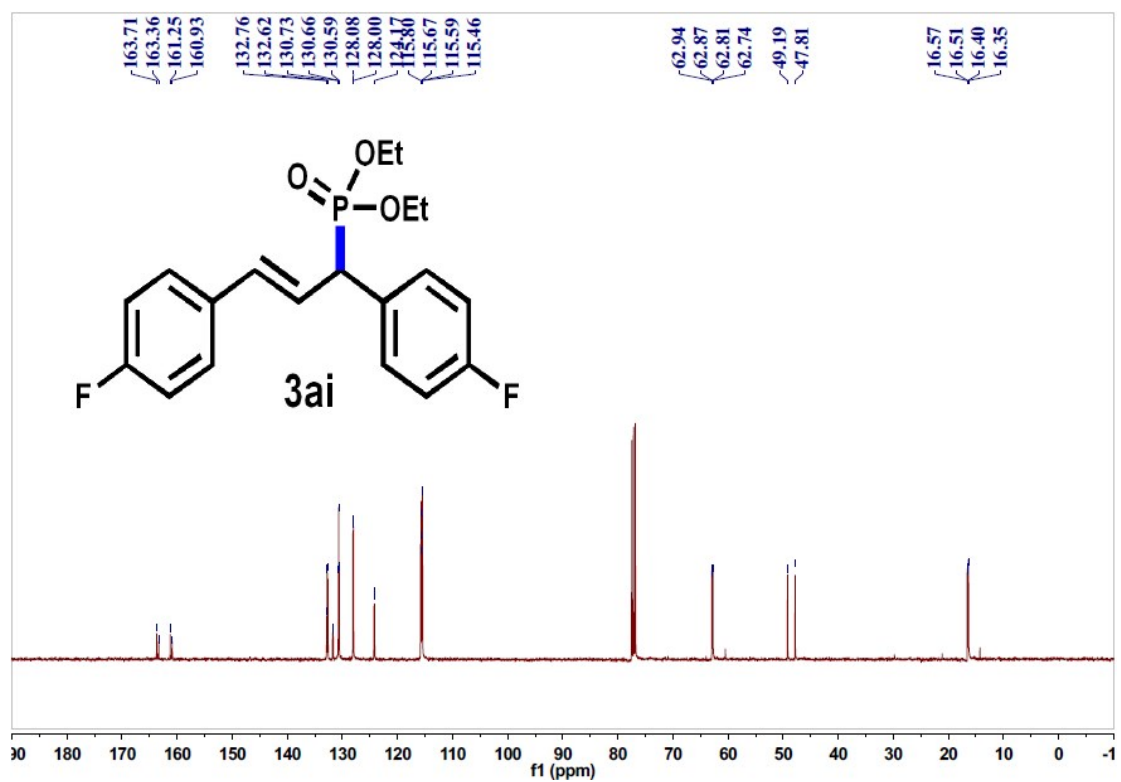



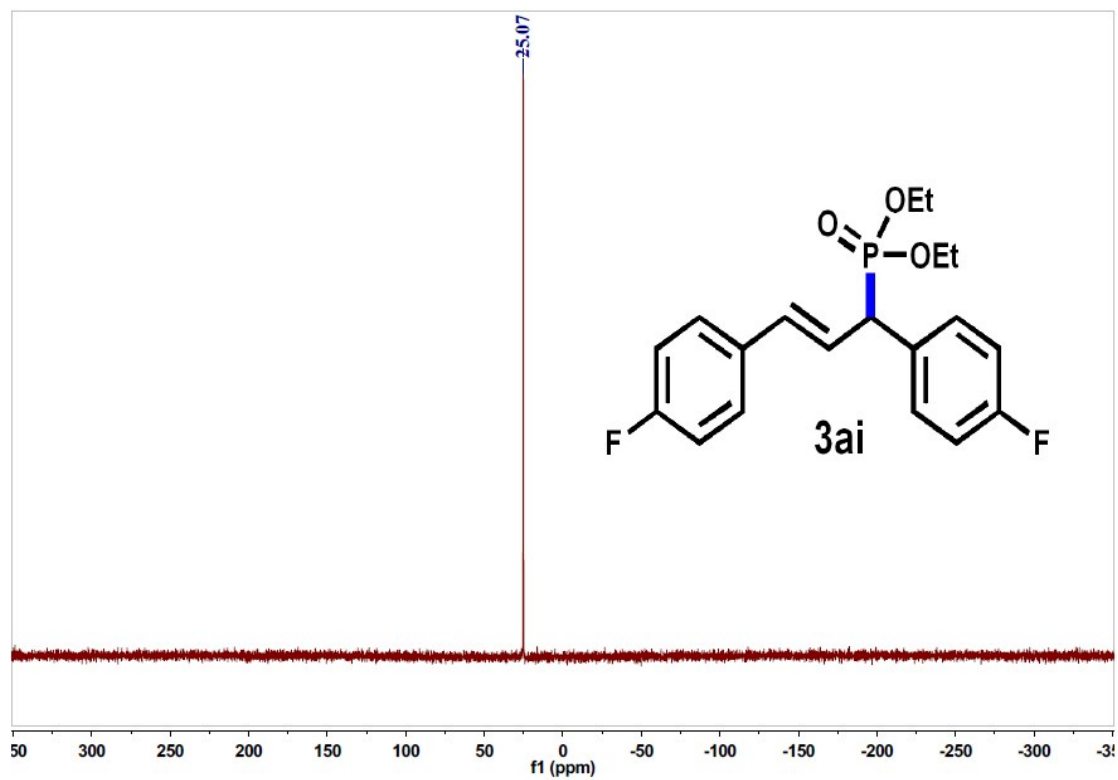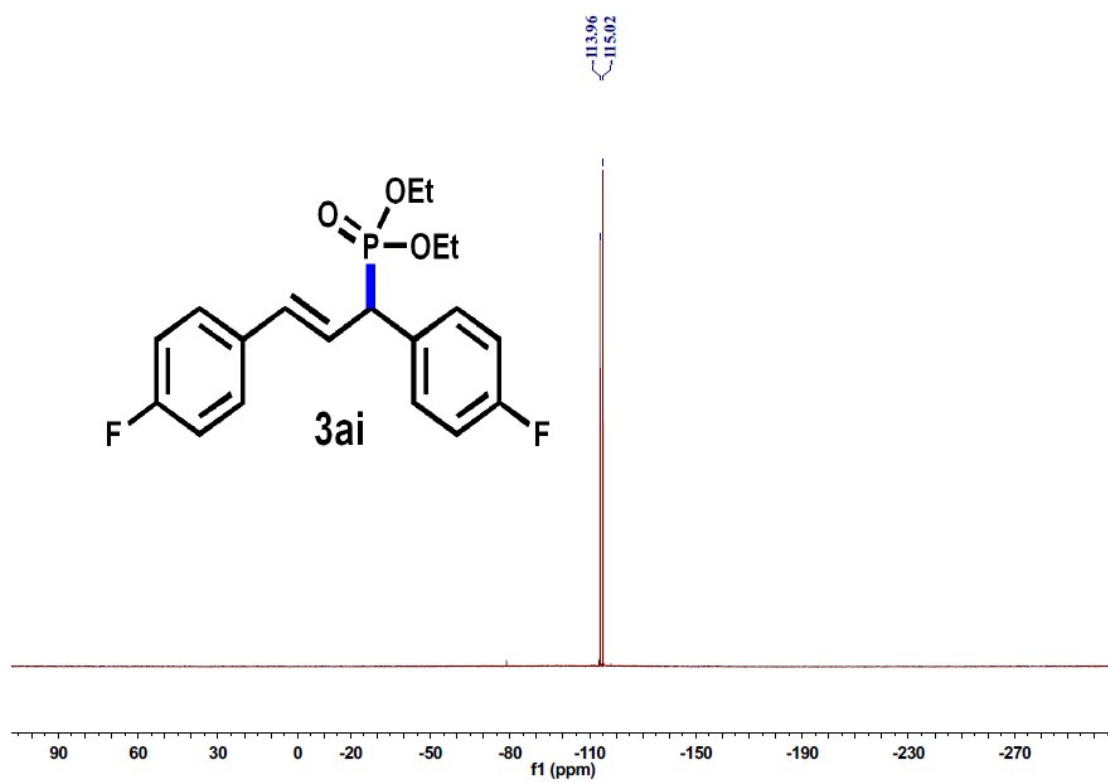

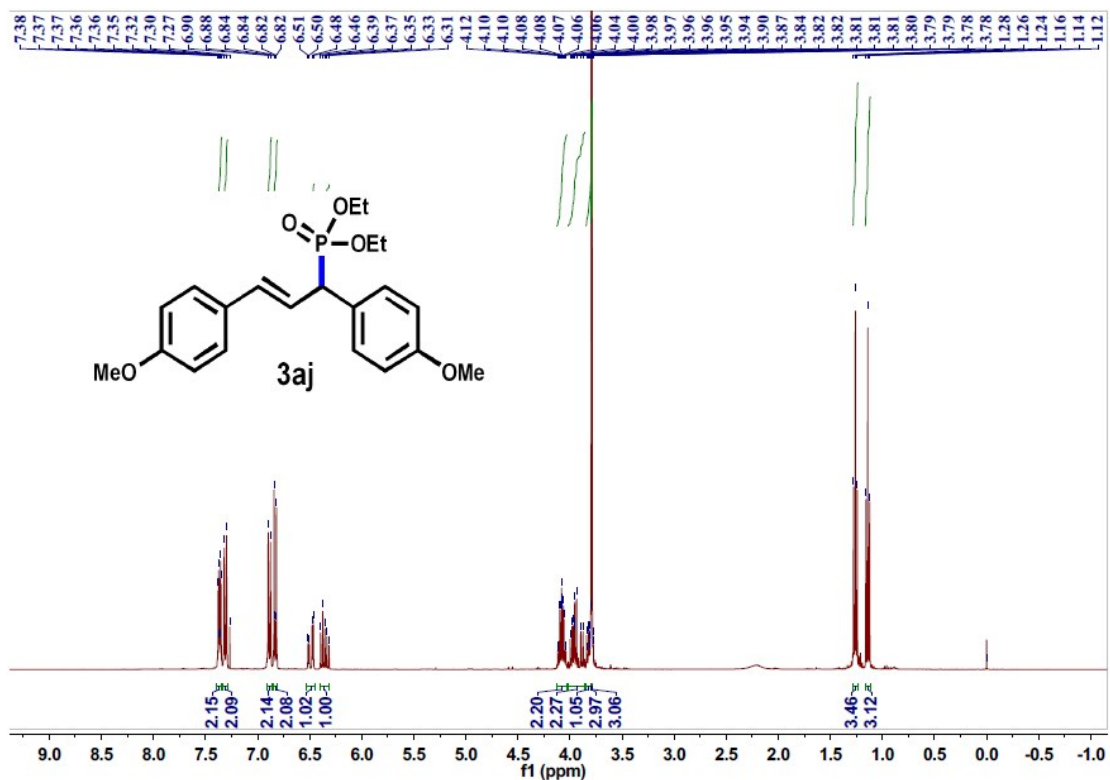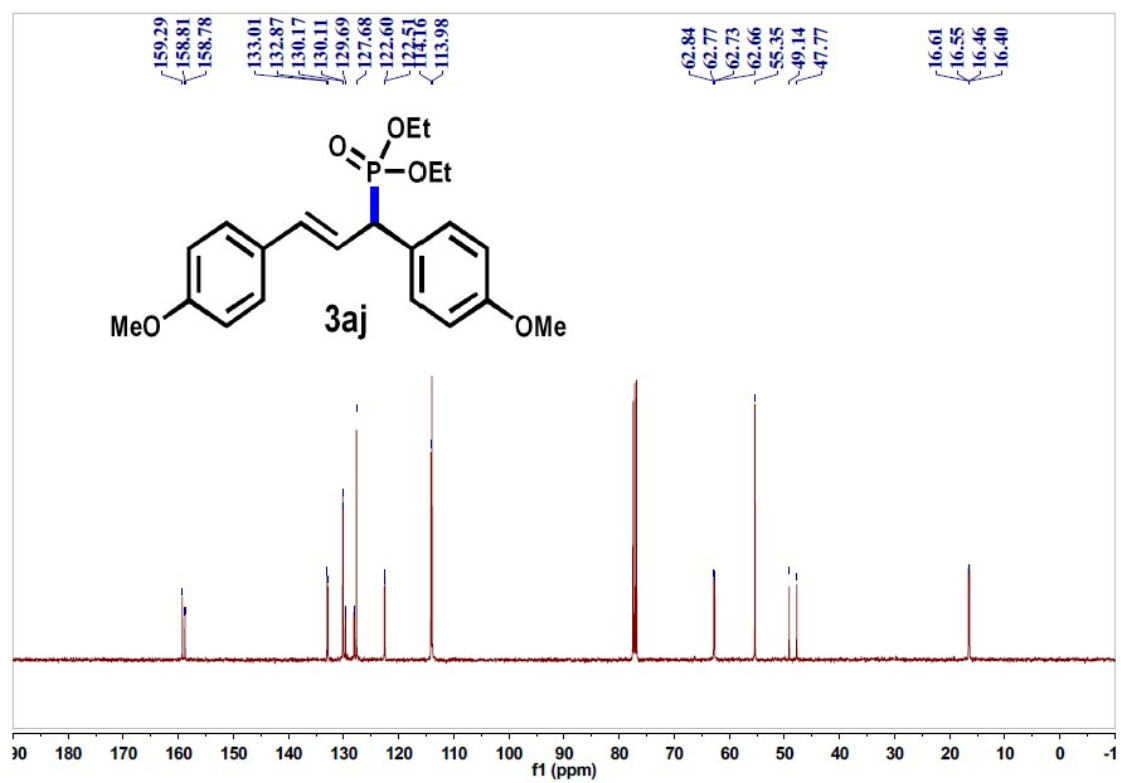

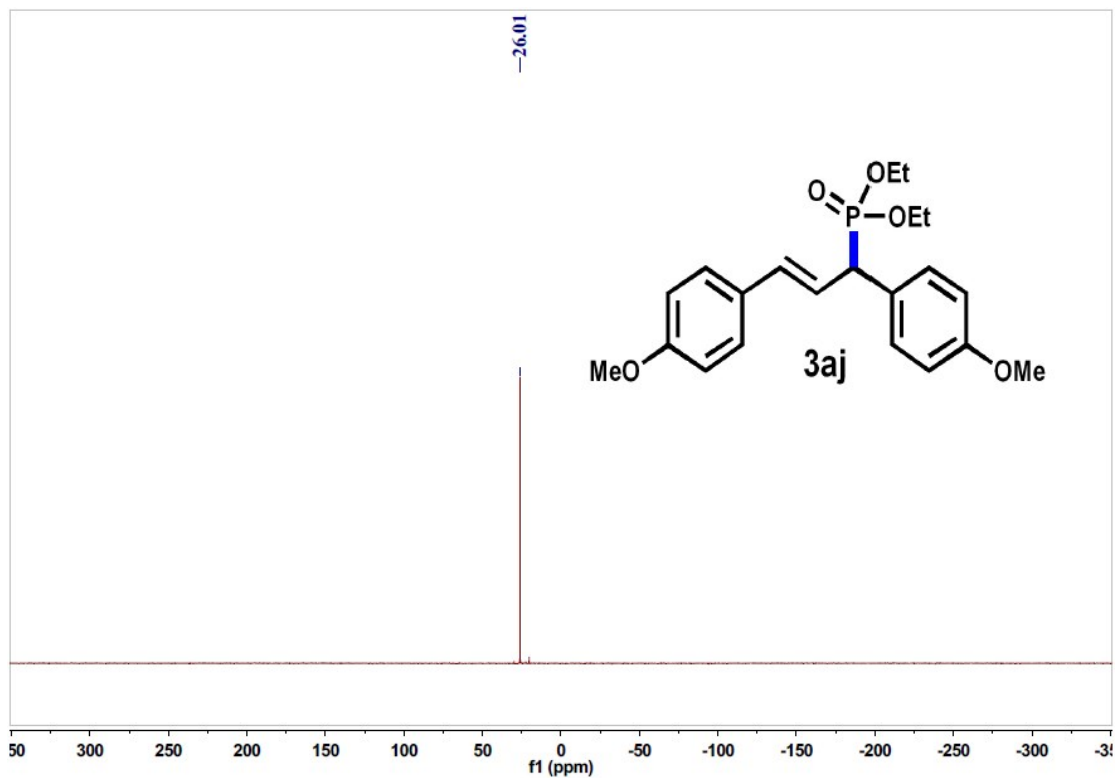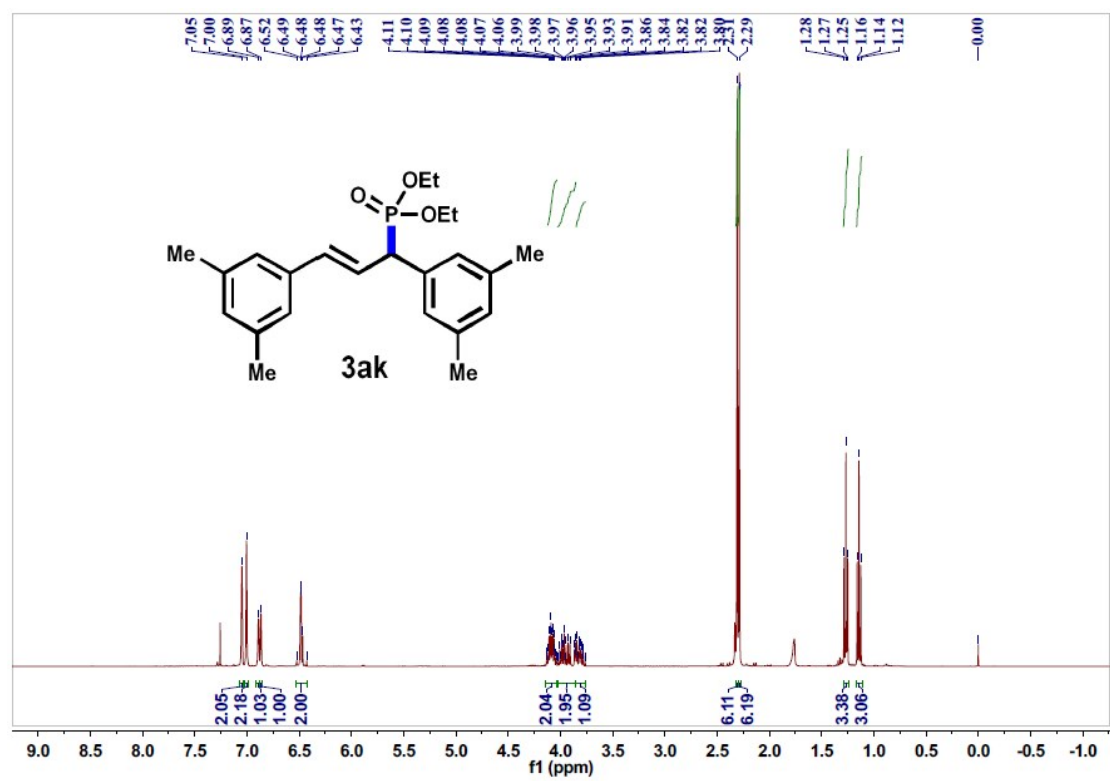

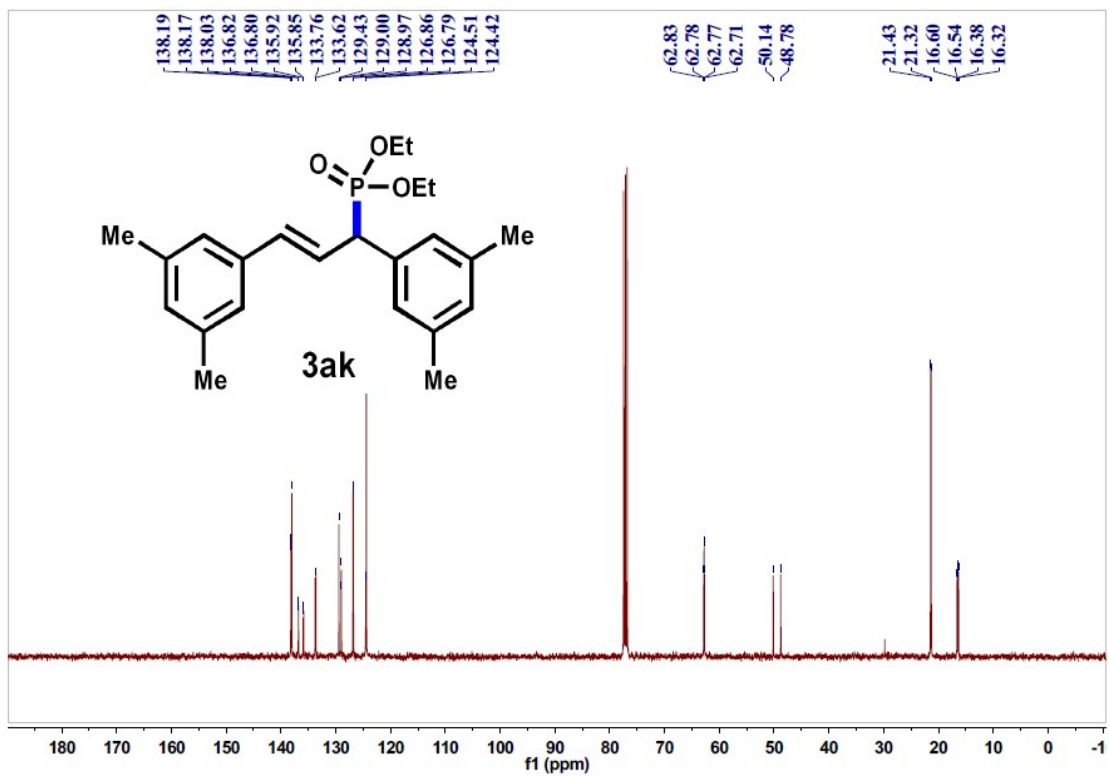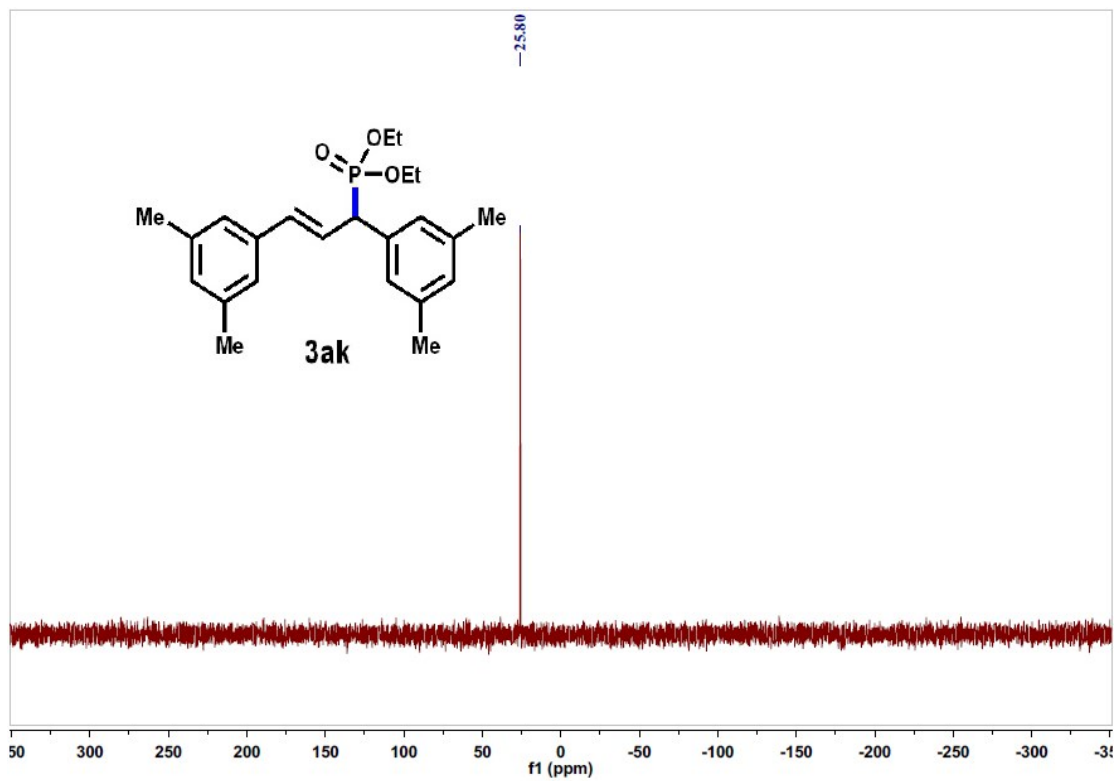

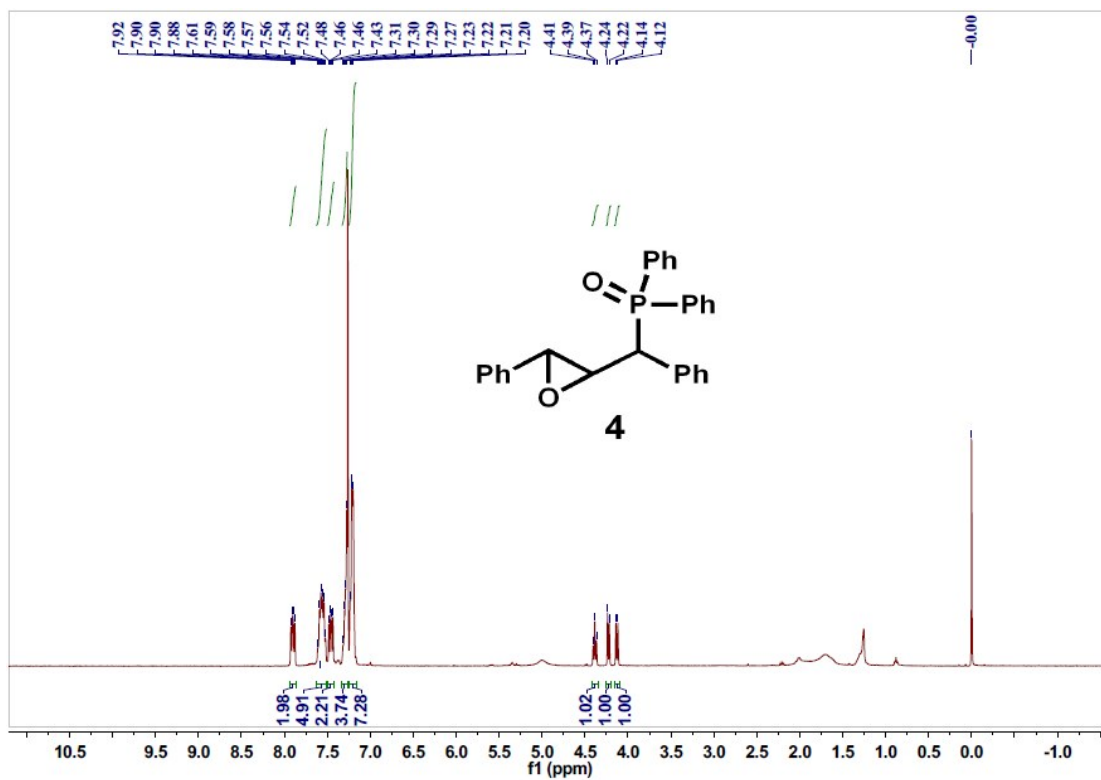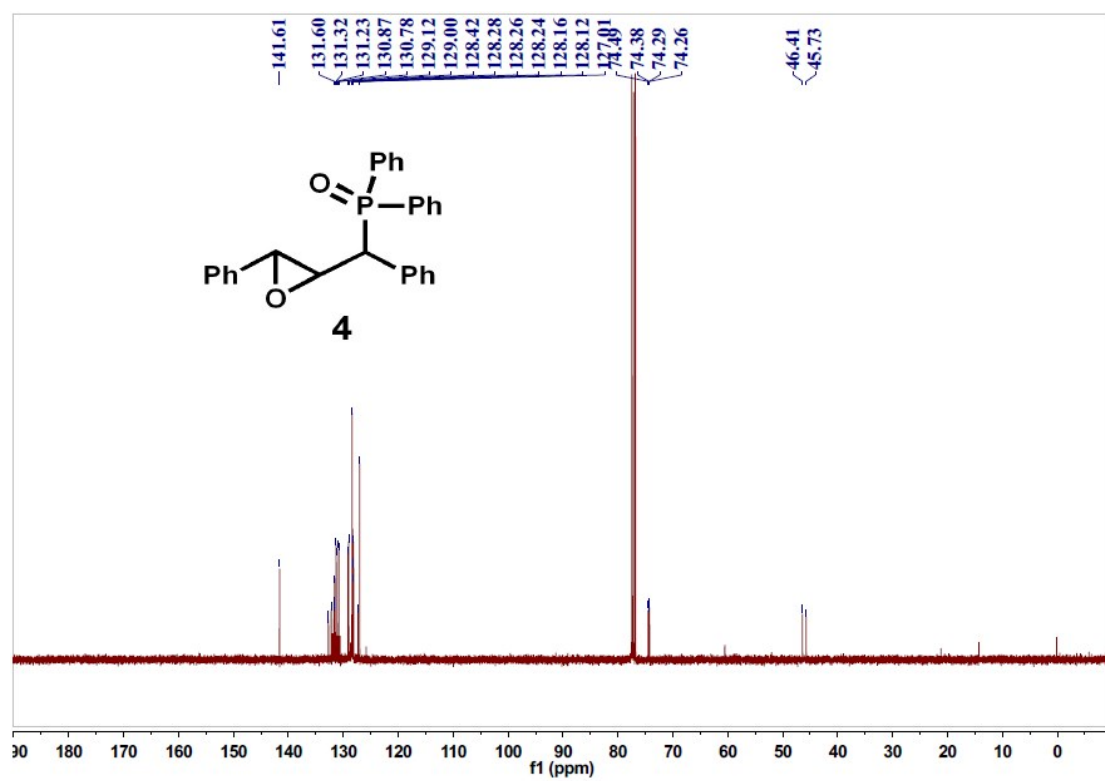

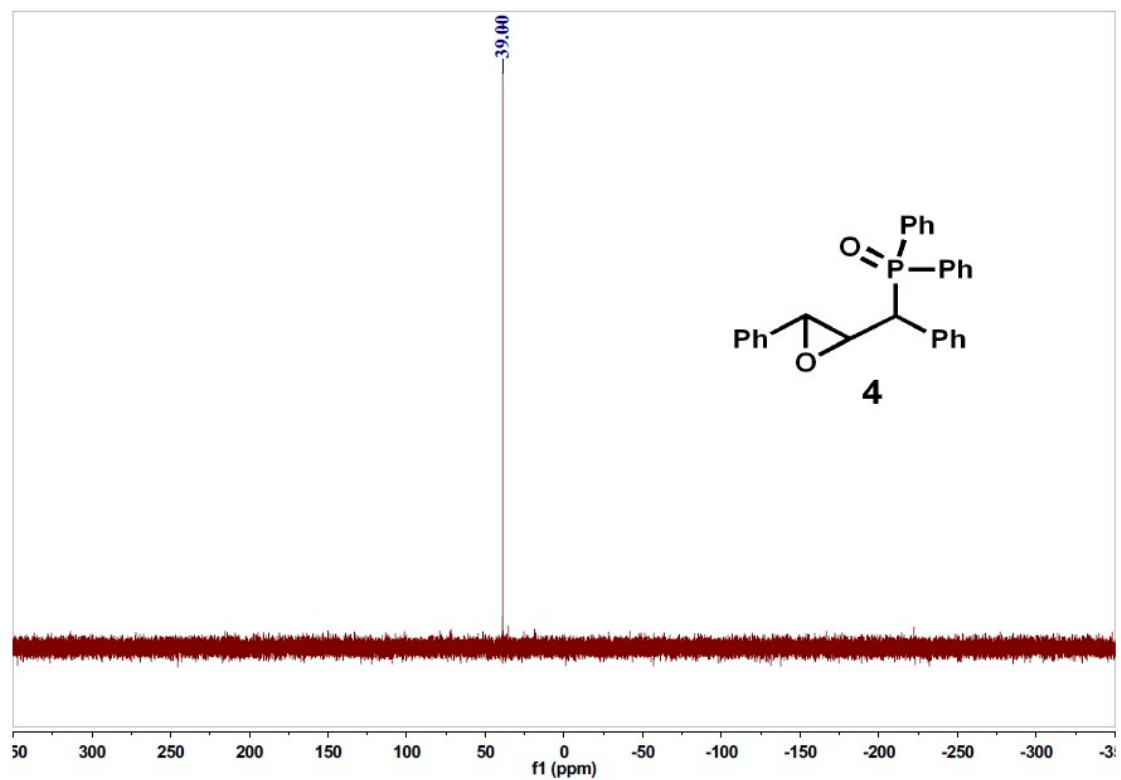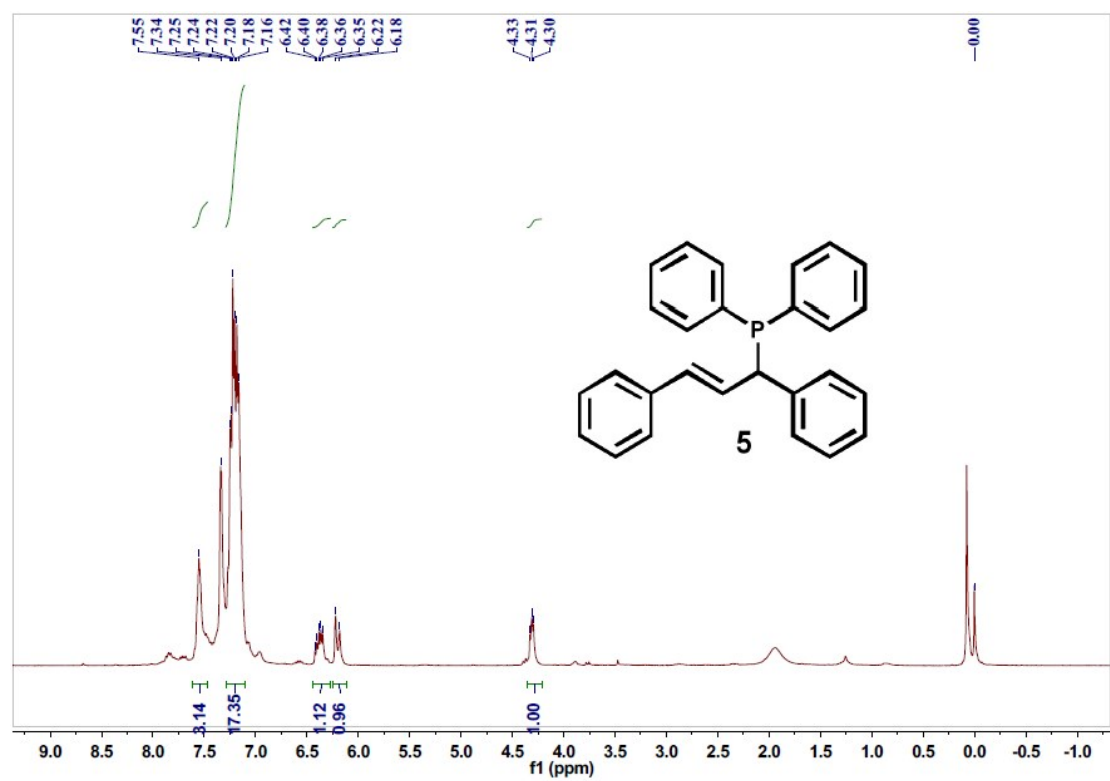

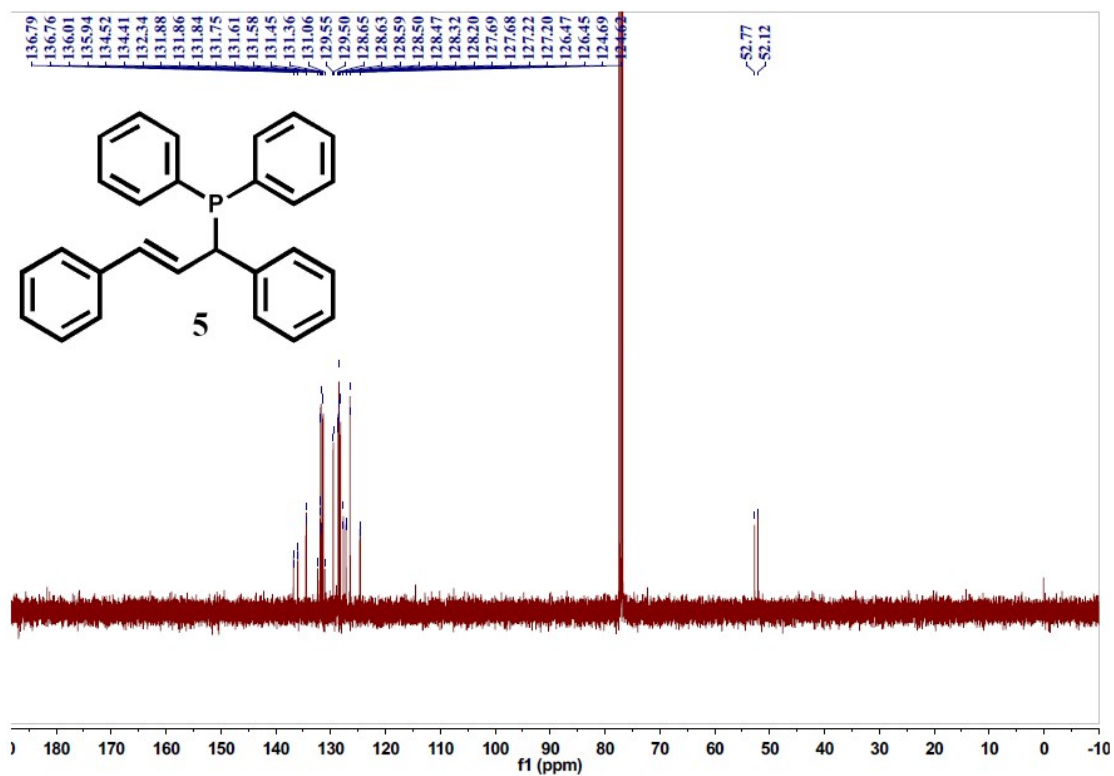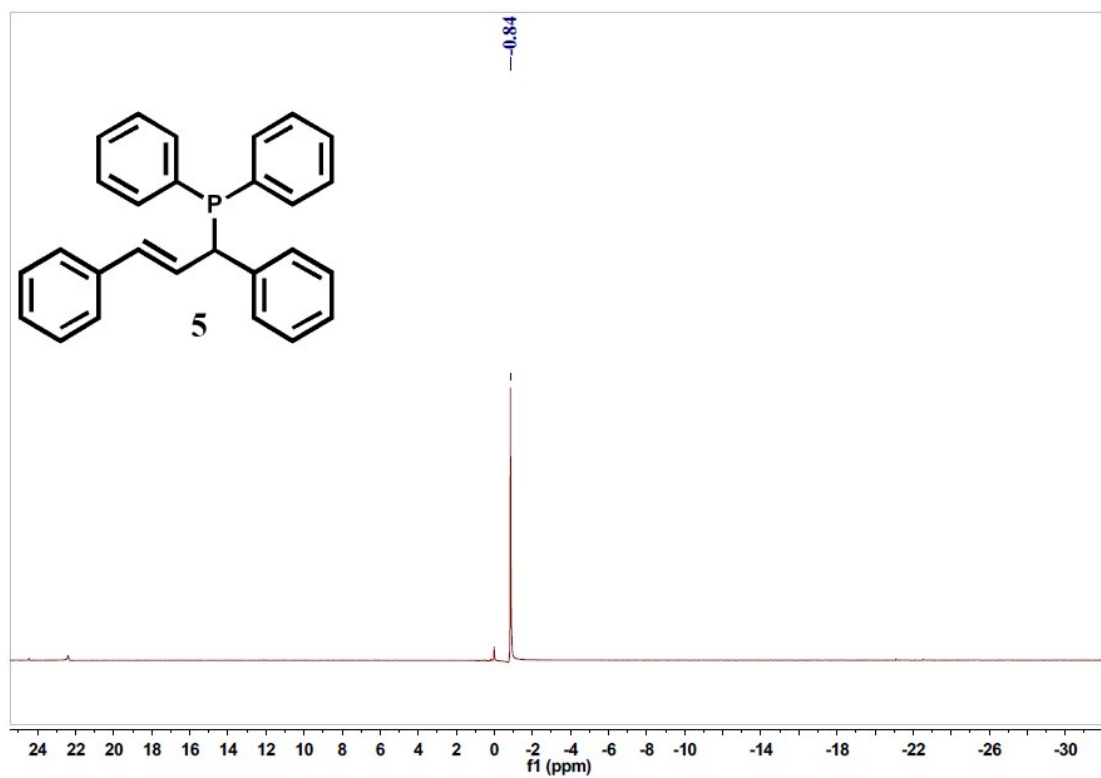

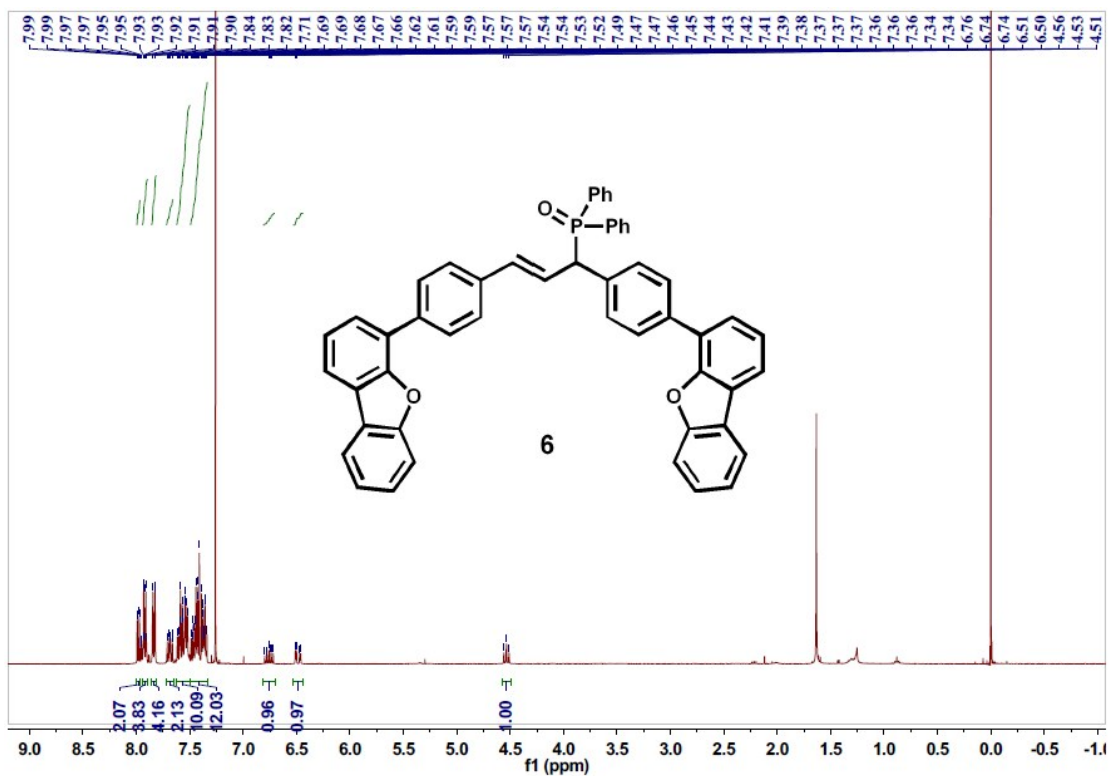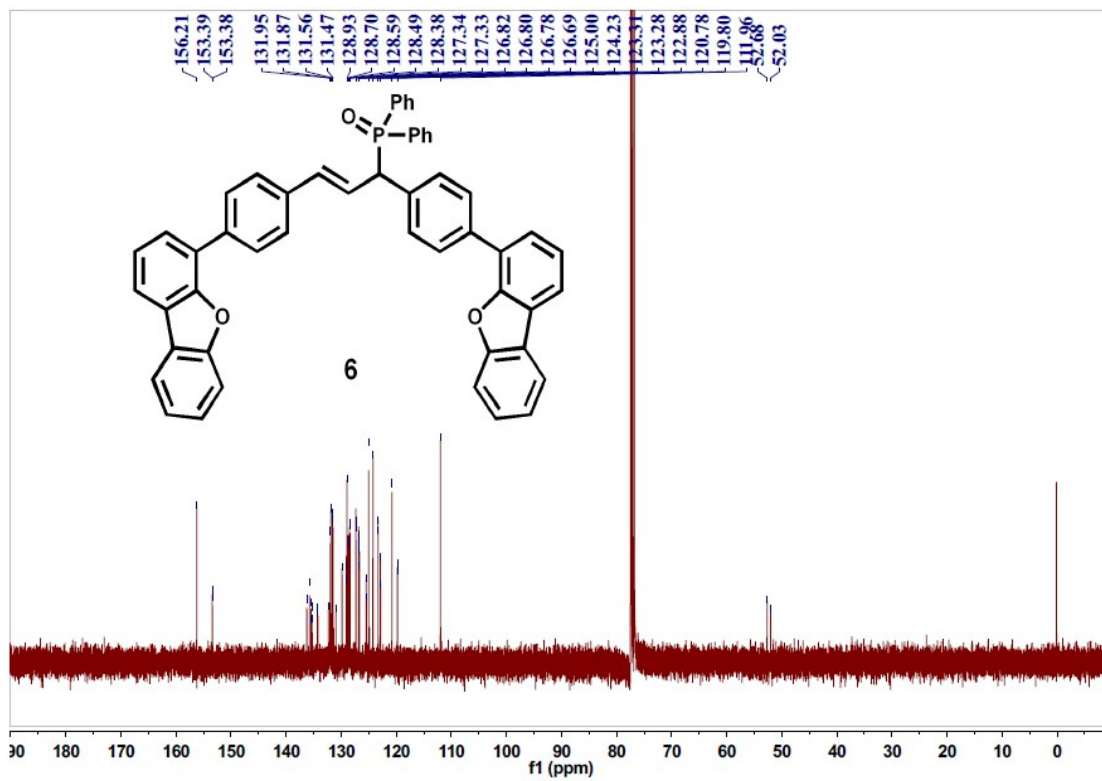



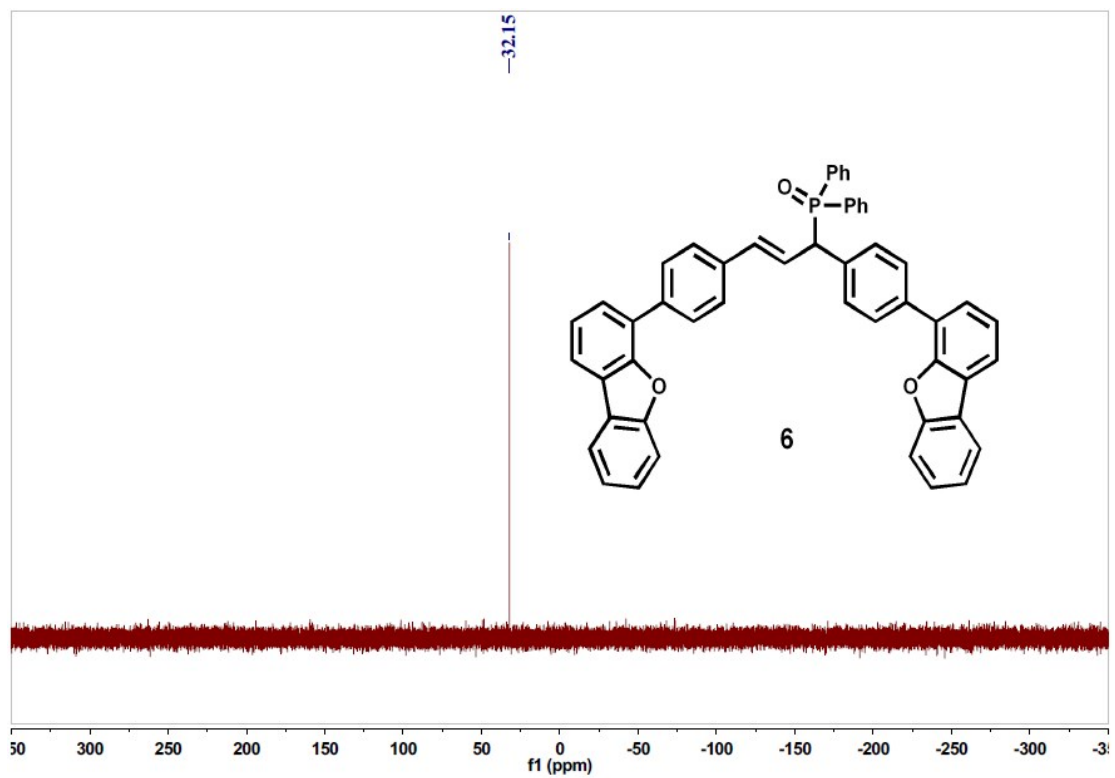

Supplement: d1gc00191d1.pdf [file d1gc00191d1.pdf]
